# Supplementary material
Source: bioRxiv or medRxiv preprint supplement (https://www.biorxiv.org/highwire/filestream/86260/field_highwire_adjunct_files/0/280792-1.pdf)
Supplement: Supplementary file [file 280792-1.pdf]

# The contribution of mitochondrial metagenomics to large-scale data mining and phylogenetic analysis of Coleoptera

Benjamin Linard, Alex Crampton-Platt, Jérôme Moriniere, Martijn J.T.N. Timmermans, Carmelo Andujar, Paula Arribas, Kirsten E. Miller, Julia Lipecki, Emeline Favreau, Amie Hunter, Carola Gomez-Rodriguez, Christopher Barton, Ruie Nie, Conrad P.D.T. Gillett, Thijmen Breeschoten, Ladislav Bocak, Alfried P. Vogler

## Table of contents

|                                                                                   |    |
|-----------------------------------------------------------------------------------|----|
| Neuropterida outgroups                                                            | 2  |
| GenBank accessions related to MMG contigs                                         | 3  |
| Illumina reads QC and mitochondrial loci selection:                               | 4  |
| Labelling of the tree tips                                                        | 5  |
| Taxonomic codes: detailed key file                                                | 6  |
| Terminals based on both NCBI and MMG loci (“MERGED” keyword)                      | 7  |
| Manual correction of erroneous sequences                                          | 20 |
| NCBI extraction and Blast threshold                                               | 21 |
| Likelihood of the 20 tree searches based on the NCBI+MMG min3loci 1RY_3Del matrix | 22 |
| Annotation of NCBI+MMG min2loci 1RY_3Del tree                                     | 23 |
| References                                                                        | 32 |

## Neuropterida outgroups

A set of 8 complete Neuropterida mitochondrial genomes, from 8 different families were used as outgroups.

| <b>Loci and Taxonomic code</b>      | <b>Species</b>                | <b>GenBank identifier</b> |
|-------------------------------------|-------------------------------|---------------------------|
| XXXXXXXXXXXXXXXXXXXX---_NO4Th7lan   | Thyridosmylus langii          | NC_021415                 |
| XXXXXXXXXXXXXXXXXXXX---_NMa4Di7bis  | Ditaxis biseriata             | NC_013257                 |
| XXXXXXXXXXXXXXXXXXXX---_NCh4Chr7nip | Chrysoperla nipponensis       | NC_015093                 |
| XXXXXXXXXXXXXXXXXXXX---_NPo4Po7pun  | Polystoechotes punctatus      | NC_011278                 |
| XXXXXXXXXXXXXXXXXXXX---_NR4Ra7xiz   | Rapisma xizangense            | NC_023362                 |
| XXXXXXXXXXXXXXXXXXXX---_NNy4Ny7myr  | Nymphes<br>myrmeleonoides     | NC_024825                 |
| XXXXXXXXXXXXXXXXXXXX---_NMy4My7imm  | Myrmeleon immanis             | NC_024826                 |
| XXXXXXXXXXXXXXXXXXXX---_NA4As7app   | Ascaloptynx<br>appendiculatus | NC_011277                 |

## GenBank accessions related to MMG contigs

| Dataset Identifier             | GenBank codes (# per subset)                                                                                                                          | Publication                   |
|--------------------------------|-------------------------------------------------------------------------------------------------------------------------------------------------------|-------------------------------|
| <b>B480</b>                    | Submitted to NCBI                                                                                                                                     | Crampton-Platt et al., 2015   |
| <b>BIUK</b>                    | Submitted to NCBI                                                                                                                                     | Crampton-Platt, PhD UCL 2015  |
| <b>MT1</b>                     | HM486073<br>HQ232800-HQ232827 (27)                                                                                                                    | Timmermans et al., 2010       |
| <b>MT2</b>                     | JX220988-JX221000 (13)<br>JX313663-JX313692 (29)<br>JX412724-JX412859 (127)<br>JN039360<br>JN163945-JN163970 (25)<br>JQ034414<br>JQ034416<br>JQ034419 | Timmermans et al., 2016       |
| <b>Curc</b>                    | Submitted to NCBI                                                                                                                                     | Gillett et al., 2014          |
| <b>Germany Barcode-of-Life</b> | KX087231 - KX087368 (139)                                                                                                                             | Present study                 |
| <b>Chryso</b>                  | KX943331-KX943509 (179)                                                                                                                               | Gómez-Rodríguez, et al., 2015 |
| <b>Staphylinidae</b>           | KT780620-KT780701 (82)                                                                                                                                | Present study                 |
| <b>Soil</b>                    | Submitted to NCBI                                                                                                                                     | Andújar et al., 2015          |
| <b>Ethanol</b>                 | KT876876-KT876915 (42)                                                                                                                                | Linard et al., 2016           |
| <b>M2015</b>                   | KX035130-KX035162 (33)                                                                                                                                | Present study                 |
| <b>Scarabaeidae</b>            | KU39447-KU739446 (80)                                                                                                                                 | Breeschoten et al., 2016      |
| <b>ChrysoT</b>                 | KX943331-KX943509 (179)                                                                                                                               | Rui et al., submitted         |
| <b>French Guyana</b>           | KT696173-KT696273 (101)                                                                                                                               | Present study                 |
| <b>Panama</b>                  | MG193322-MG193541 (220)                                                                                                                               | Present study                 |
| <b>Scolytinae</b>              | KX035130-KX035226 (64)                                                                                                                                | Miller et al., unpublished    |
| <b>Cocci</b>                   | KJ778881-KJ77883 (3)<br>KJ778886<br>KJ778888-KJ778889 (2)                                                                                             | Paula et al., 2014            |

## Illumina reads QC and mitochondrial loci selection:

1. Trimmomatic was used to discard eventual Illumina adapter left in the metagenomes:  

```
java -jar trimmomatic-0.33.jar PE -threads 4 -phred33 -trimlog MyLibraryTrimlog  
MyLibrary_R1.fq MyLibrary_R2.fq MyLibrary_R1.paired.fq MyLibrary_R1.unpaired.fq  
MyLibrary_R2.paired.fq MyLibrary_R2.unpaired.fq  
ILLUMINACLIP:MyLibrary_Truseq_trimseqs.fa:2:30:10
```
2. Prinseq was used to trim reads of low quality with:  

```
perl prinseq-lite.pl -verbose -fastq MyLibrary.fq -log -out_format 3 -out_good  
MyLibrary.QC -min_len 150 -min_qual_mean 25 -ns_max_n 0 -trim_qual_right 20
```
3. Mitochondrial reads were filtered with the help of blastn. First the quality controlled metagenomes were blasted to a custom database of a hundred of Coleopteran mitochondrial genomes with this command:  

```
blastn -db MitogenomeReferences.fa -query MyLibrary.paired.fq -out  
MyLibrary.paired.blastn -task blastn -evalue 1e-5 -max_target_seqs 1 -outfmt 6 -dust no
```
4. All reads matching this database at a Evalue inferior to  $1e-3$  and with at least 70% of identity were filtered out with a custom script to form a putative mitochondrial reads subset.
5. Following these quality control and filtering, the read subset was submitted to IDBA assembly with:  

```
idba_ub --mink 80 --maxk 250or300 --min_contig 1000 --similar 0.98
```
6. All contigs <5kb were discarded (short contigs cannot be identified because they don't hold the cox1 or cytb regions)
7. All remaining contigs were submitted to the pipeline of Bocak et al., 2014.

# Labelling of the tree tips

The tips labels contain 3 groups (see figure below), the locus code, the taxonomic code, the Linnaean binomial and metadata related to the mitochondrial contig if the tip is partially or fully based on loci extracted from the MMG dataset.

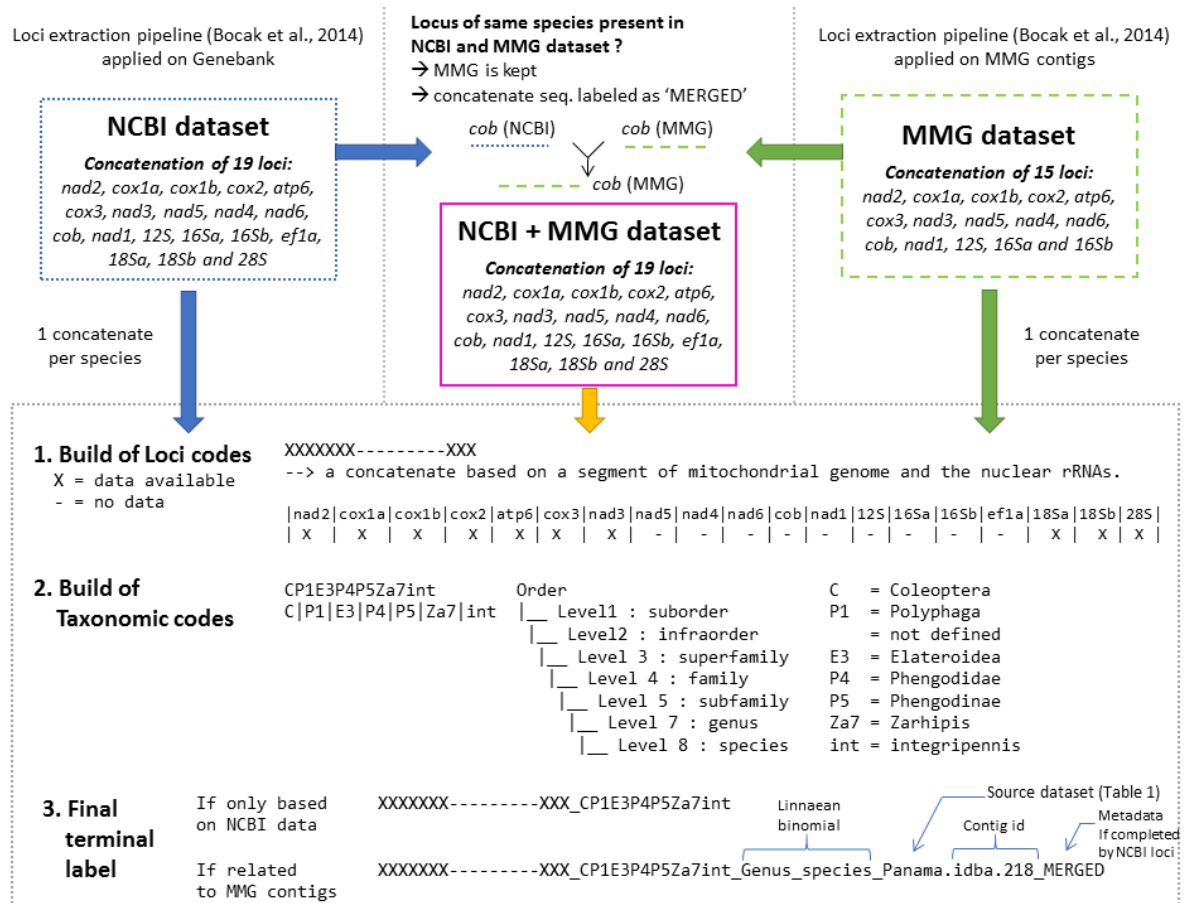

- **Locus code:** The ordered X/- symbols help the reader to determine which locus supports a particular tip. Typically, a X on the first 15 positions means a full mitochondria, while the 4 last positions represent the nuclear loci used in the analysis. The example in the figure below describe a species supported by a first half of mitochondrial genome ( loci nad2 to nad3) and 3 nuclear loci.
- **Taxonomic code:** This code is similar to the one used in Bocak et al, 2014. Eight taxonomic orders are associated to combinations of 1 to 3 letters and a number. The numbers represent 8 taxonomical levels: 1=suborder, 2=infraorder, 3=superfamily, 4=family, 5=subfamily, 7=genus, 8=species. A tip may or may not be associated to each of these levels: see the example below where the infraorder of Zarhipis integripennis is undefined (level 3 absent). A tip may also be associated to only high taxonomic ranks if the sequence was extracted from poorly identified specimens. Example: a taxonomic code limited to "CP1E3" correspond to an Elateroidea sp. (specimen identified at superfamily level).
- **Linnaean binomial:** The genus and species in plain letter in most cases. When the sequence correspond to a specimen identified at higher taxonomic levels, this higher level is used

instead. Example: Elateroidea sp.

- Finally, if the tip is related to MMG sequences, the study and the contig from which were built at least 1 locus are reported as **supplementary keywords**. These metadata are labelled using the following set of keywords :
  - o **NCBI**: indicates that the tip is fully based on NCBI loci.
  - o **MMG**: indicates that the tip is fully based on a MMG contig.
  - o **MERGED**: indicates that at least one locus supporting the tip was from available both from the NCBI and MMG datasets. In such case the MMG locus was kept (ensuring coherence of the full mitochondrial contig).
  - o **ANNOT\_FROM\_BARCODE**: is related to MMG contigs for which study-related, NCBI or BOLD barcodes allowed DNA-based identification of the genus or species (match >99.8%, sequenced assigned to species, match >99% identity, sequenced assigned to genus level).
  - o **ANNOT\_FROM\_TREE**; is related to MMG contigs for which no matching barcodes or other reference sequences could be discovered. In such case, the superfamily to which was placed the sequence (through tree reconstruction) was used as a high-level taxonomic identification.

## Taxonomic codes: detailed key file

All taxonomic codes and their detailed description can be found in Suppl. File S2 (excel table).

# Terminals based on both NCBI and MMG loci (“MERGED” keyword)

(Ordered taxonomically via the column “NCBI original taxonomic code)

(Use Suppl. File S2 to get taxonomic code details)

| NCBI original loci code | NCBI original taxonomic code | MMG original loci code | MMG original taxonomic code                                  | MERGED loci code       | MERGED label                                                        |
|-------------------------|------------------------------|------------------------|--------------------------------------------------------------|------------------------|---------------------------------------------------------------------|
| -XX-----                | CA1C3C4B6Br7cre              | XXXXXXXXXXXXXX         | CA1C3C4B6Br7cre_Brachinus_crepitans_JX412826                 | XXXXXXXXXXXXXX         | CA1C3C4B6Br7cre_Brachinus_crepitans_JX412826_MERGED                 |
| --X-----X-XX--XX-       | CA1C3C4C5C6Hab7cap           | XXXXXXXXXXXXXX         | CA1C3C4C5C6Hab7cap_Habrodera_capensis_JX412824               | XXXXXXXXXXXXXX-XX-     | CA1C3C4C5C6Hab7cap_Habrodera_capensis_JX412824_MERGED               |
| -XX---X--X-XXX-XXX      | CA1C3C4Ca6Ca7n7em            | -XXXXXXXXXXXXXX        | CA1C3C4Ca6Ca7n7em_Carabus_nemoralis_BIUK.idba.47             | -XXXXXXXXXXXXXX-XXX    | CA1C3C4Ca6Ca7n7em_Carabus_nemoralis_BIUK.idba.47_MERGED             |
| -XX---X--X-XXX-X-X      | CA1C3C4Ca6Ca7prob            | XXXXX-----             | CA1C3C4Ca6Ca7prob_Carabus_problematicus_BIUK.idba.82         | XXXXX--X--X-XXX-X-X    | CA1C3C4Ca6Ca7prob_Carabus_problematicus_BIUK.idba.82_MERGED         |
| -X-----X-XXX-XXX        | CA1C3C4Cy6Cy7car             | XXXXXXXXXXXXXX         | CA1C3C4Cy6Cy7car_Cychrus_caraboides_BIUK.idba.13             | XXXXXXXXXXXXXX-XXX     | CA1C3C4Cy6Cy7car_Cychrus_caraboides_BIUK.idba.13_MERGED             |
| -X-----XX-              | CA1C3C4E5E6B17mul            | XXXXXXXXXX             | CA1C3C4E5E6B17mul_Blethisa_multipunctata_ameie.idba.101      | XXXXXXXXXX-----XX-     | CA1C3C4E5E6B17mul_Blethisa_multipunctata_ameie.idba.101_MERGED      |
| -XX-----X--XX-          | CA1C3C4E5E6E17cup            | XXXXXXXXXXXXXX         | CA1C3C4E5E6E17cup_Elaphrus_cupreus_ameie.idba.30             | XXXXXXXXXXXXXX--XX-    | CA1C3C4E5E6E17cup_Elaphrus_cupreus_ameie.idba.30_MERGED             |
| -XXX--X-----            | CA1C3C4H5H6An7poe            | XXXXXX-----            | CA1C3C4H5H6An7poe_Anisodactylus_poeciloides_ameie.idba.172   | XXXXXX-X-----          | CA1C3C4H5H6An7poe_Anisodactylus_poeciloides_ameie.idba.172_MERGED   |
| -XX-----                | CA1C3C4H5H6Br7ruf            | XXXXXXXXXX             | CA1C3C4H5H6Br7ruf_Bradycellus_ruficollis_ameie.idba.124      | XXXXXXXXXX-----        | CA1C3C4H5H6Br7ruf_Bradycellus_ruficollis_ameie.idba.124_MERGED      |
| -XX-----                | CA1C3C4H5H6Cry7ten           | XX-----                | CA1C3C4H5H6Cry7ten_Cryptophonus_tenebrosus_ameie.idba.193    | XX-----                | CA1C3C4H5H6Cry7ten_Cryptophonus_tenebrosus_ameie.idba.193_MERGED    |
| -XX-----                | CA1C3C4H5H6Op7ard            | -XXXXXXXXXXXX          | CA1C3C4H5H6Op7ard_Ophonus_ardosiacus_Soil.idba.8a            | -XXXXXXXXXXXX-----     | CA1C3C4H5H6Op7ard_Ophonus_ardosiacus_Soil.idba.8a_MERGED            |
| -X-----                 | CA1C3C4H5L6Le7chl            | XXXXXXXXXXXXXX         | CA1C3C4H5L6Le7chl_Lebia_chlorocephala_ameie.idba.39          | XXXXXXXXXXXXXX-----    | CA1C3C4H5L6Le7chl_Lebia_chlorocephala_ameie.idba.39_MERGED          |
| -XX-----X-              | CA1C3C4H5L6Mic7min           | XXXXXXXXXXXXXX         | CA1C3C4H5L6Mic7min_Microlestes_minutulus_ameie.idba.19       | XXXXXXXXXXXXXX-----X-  | CA1C3C4H5L6Mic7min_Microlestes_minutulus_ameie.idba.19_MERGED       |
| -XX-----                | CA1C3C4H5L6Sy7fov            | XXXXXXXXXX             | CA1C3C4H5L6Sy7fov_Syntomus_foveatus_Soil.idba.104            | XXXXXXXXXX-----        | CA1C3C4H5L6Sy7fov_Syntomus_foveatus_Soil.idba.104_MERGED            |
| -XXX--X-----XX-XX-      | CA1C3C4H5P6Ab7par            | XXXXXXXXXXXXXX         | CA1C3C4H5P6Ab7par_Abax_parallelepipedus_2VGB.idba.3          | XXXXXXXXXXXXXX-XX-     | CA1C3C4H5P6Ab7par_Abax_parallelepipedus_2VGB.idba.3_MERGED          |
| -X-----XX-              | CA1C3C4H5P6Ab7para           | -XXXXXX-----           | CA1C3C4H5P6Ab7para_Abax_parallelus_ameie.idba.169            | -XXXXXX----XX----      | CA1C3C4H5P6Ab7para_Abax_parallelus_ameie.idba.169_MERGED            |
| -XX-----                | CA1C3C4H5P6Pt7mad            | -XXXXXXXXXXXX          | CA1C3C4H5P6Pt7mad_Pterostichus_madidus_BIUK.idba.54          | -XXXXXXXXXXXX-----     | CA1C3C4H5P6Pt7mad_Pterostichus_madidus_BIUK.idba.54_MERGED          |
| -XX-----XX-             | CA1C3C4H5P6Pt7nig            | XXXXXXXXXXXXXX         | CA1C3C4H5P6Pt7nig_Pterostichus_niger_2VGB.idba.5             | XXXXXXXXXXXXXX-XX-     | CA1C3C4H5P6Pt7nig_Pterostichus_niger_2VGB.idba.5_MERGED             |
| -XXX-----XX-            | CA1C3C4H5P6St7pum            | XXXXXXXXXXXXXX         | CA1C3C4H5P6St7pum_Stomis_pumicatus_2VGB.idba.4               | XXXXXXXXXXXXXX-XX-     | CA1C3C4H5P6St7pum_Stomis_pumicatus_2VGB.idba.4_MERGED               |
| -XX-----                | CA1C3C4H5Z6Am7com            | XXXXXXXXXXXXXX         | CA1C3C4H5Z6Am7com_Amara_communis_677553_idba_contig.5        | XXXXXXXXXXXXXX-----    | CA1C3C4H5Z6Am7com_Amara_communis_677553_idba_contig.5_MERGED        |
| -XX-----X--XX-          | CA1C3C4L5L6Lo7pil            | XXXXXXXXXXXXXX         | CA1C3C4L5L6Lo7pil_Loricera_pilicornis_BIUK.idba.49           | XXXXXXXXXXXXX-X--XX-   | CA1C3C4L5L6Lo7pil_Loricera_pilicornis_BIUK.idba.49_MERGED           |
| -XX-----XX-XX-          | CA1C3C4Ne6Ne7bre             | XXXXXXXXXXXXXX         | CA1C3C4Ne6Ne7bre_Nebria_brevicollis_2VGB.idba.0              | XXXXXXXXXXXXXX-XX-     | CA1C3C4Ne6Ne7bre_Nebria_brevicollis_2VGB.idba.0_MERGED              |
| -XXX-----XXX-           | CA1C3C4P15P6Ag7mue           | -XXXXXXXXXXXX          | CA1C3C4P15P6Ag7mue_Agonum_muelleri_JX412835                  | -XXXXXXXXXXXX--XXX-    | CA1C3C4P15P6Ag7mue_Agonum_muelleri_JX412835_MERGED                  |
| -XX-----                | CA1C3C4P15P6Ox7obs           | XXXXXXXXXXXXXX         | CA1C3C4P15P6Ox7obs_Oxypselaphus_obscurus_BIUK.idba.26        | XXXXXXXXXXXXXX-----    | CA1C3C4P15P6Ox7obs_Oxypselaphus_obscurus_BIUK.idba.26_MERGED        |
| -XXX-----X--            | CA1C3C4P15S6Ca7me1           | XXXX--XXXX             | CA1C3C4P15S6Ca7me1_Calathus_melanocephalus_2VGB.idba.15      | XXXX-----XXXX--        | CA1C3C4P15S6Ca7me1_Calathus_melanocephalus_2VGB.idba.15_MERGED      |
| -XXXX-----XX-           | CA1C3C4Pr5P6Pr7cra           | XXXXXXXXXXXXXX         | CA1C3C4Pr5P6Pr7cra_Promecognathus_crassus_JX313665           | XXXXXXXXXXXXXX--XX-    | CA1C3C4Pr5P6Pr7cra_Promecognathus_crassus_JX313665_MERGED           |
| -X-----XX-              | CA1C3C4T5B6Be7lae            | XXXXXXXXXXXXXX         | CA1C3C4T5B6Be7lae_Bembidion_laetum_Soil.idba.40              | XXXXXXXXXXXXXX-XX-     | CA1C3C4T5B6Be7lae_Bembidion_laetum_Soil.idba.40_MERGED              |
| -X-----XX-              | CA1C3C4T5B6Be7var            | XXXXXXXXXXXXXX         | CA1C3C4T5B6Be7var_Bembidion_varium_ameie.idba.56             | XXXXXXXXXXXXXX--XX-    | CA1C3C4T5B6Be7var_Bembidion_varium_ameie.idba.56_MERGED             |
| -X-----XX-              | CA1C3C4T5B6Ta7nan            | XXXXXXXXXXXXXX         | CA1C3C4T5B6Ta7nan_Tachyta_nana_832958_idba_contig.6          | XXXXXXXXXXXXXX-XX-     | CA1C3C4T5B6Ta7nan_Tachyta_nana_832958_idba_contig.6_MERGED          |
| -X-----                 | CA1C3C4T5Po6Po7iri           | XXXXXXXXXXXXXX         | CA1C3C4T5Po6Po7iri_Pogonus_iridipennis_ameie.idba.48         | XXXXXXXXXXXXXX-----    | CA1C3C4T5Po6Po7iri_Pogonus_iridipennis_ameie.idba.48_MERGED         |
| -XXX-----XX-X-          | CA1C3C4T5Tr7obt              | XXXXXXXXXXXXXX         | CA1C3C4T5Tr7obt_Trechus_obtusus_Soil.idba.42                 | XXXXXXXXXXXXXX-X-      | CA1C3C4T5Tr7obt_Trechus_obtusus_Soil.idba.42_MERGED                 |
| XXXXXXXXXX-XXX-XX-      | CA1C3T4Tr7hol                | XXXXXXXXXXXXXX         | CA1C3T4Tr7hol_Trachypachus_holmbergi_NC_011329               | XXXXXXXXXXXXXX-XX-     | CA1C3T4Tr7hol_Trachypachus_holmbergi_NC_011329_MERGED               |
| -X-----X-XXX-XX-        | CA1D3A4Am7ins                | XX-----                | CA1D3A4Am7ins_Amphizoa_insolens_799022_idba_contig.85        | XX-----X-XXX-XX-       | CA1D3A4Am7ins_Amphizoa_insolens_799022_idba_contig.85_MERGED        |
| XXXXXXXXXXXXXX-XX-      | CA1D3As4As7nio               | XXXXXXXXXXXXXX         | CA1D3As4As7nio_Aspidytes_niobe_NC_012139                     | XXXXXXXXXXXXXX-XX-     | CA1D3As4As7nio_Aspidytes_niobe_NC_012139_MERGED                     |
| -XX-----XX-             | CA1D3D4A5A6Ag7uli            | XXXXXXXXXXXXXX         | CA1D3D4A5A6Ag7uli_Agabus_uliginosus_ameie.idba.68            | XXXXXXXXXXXXXX-----    | CA1D3D4A5A6Ag7uli_Agabus_uliginosus_ameie.idba.68_MERGED            |
| -XXX-----X-XXXX-        | CA1D3D4C5C6Co7fus            | XXXXXXXXXXXXXX-X----   | CA1D3D4C5C6Co7fus_Colymbetes_fuscus_1VWB.idba.16             | XXXXXXXXXXXXXX-----    | CA1D3D4C5C6Co7fus_Colymbetes_fuscus_1VWB.idba.16_MERGED             |
| --X-----X-----XX-       | CA1D3D4Co5C6L17hae           | XXXXXXXXXXXXXX         | CA1D3D4Co5C6L17hae_Liopterus_haemorrhoidalis_1VWB.idba.11    | XXXXXXXXXXXXXX-XX-     | CA1D3D4Co5C6L17hae_Liopterus_haemorrhoidalis_1VWB.idba.11_MERGED    |
| -XXX-----X--XX-         | CA1D3D4D5Ac6Ac7sul           | XXXXXXXXXXXXXX         | CA1D3D4D5Ac6Ac7sul_Acilius_sulcatus_1VWB.idba.3              | XXXXXXXXXXXXXX-XX-     | CA1D3D4D5Ac6Ac7sul_Acilius_sulcatus_1VWB.idba.3_MERGED              |
| -XX-----XX-XX-          | CA1D3D4D5C6Cy7lat            | XXXXXXXXXX             | CA1D3D4D5C6Cy7lat_Cybister_lateralimarginalis_ameie.idba.131 | XXXXXXXXXX--XX-XX-     | CA1D3D4D5C6Cy7lat_Cybister_lateralimarginalis_ameie.idba.131_MERGED |
| -X-----XX----           | CA1D3D4H5H6Hy7dis            | XXXXXXXXXX             | CA1D3D4H5H6Hy7dis_Hydroporus_discretus_1VWB.idba.14          | XXXXXXXXXX--XX----     | CA1D3D4H5H6Hy7dis_Hydroporus_discretus_1VWB.idba.14_MERGED          |
| -XX-----X--XX-          | CA1D3D4H5H6Hy7ery            | -----XXXXXXXXXX        | CA1D3D4H5H6Hy7ery_Hydroporus_erythrocephalus_1VWB.idba.20    | -XX-----XXXXXXXXXX-    | CA1D3D4H5H6Hy7ery_Hydroporus_erythrocephalus_1VWB.idba.20_MERGED    |
| -XX-----XX----          | CA1D3D4H5H6Hy7gyl            | XXXXXXXXXXXXXX         | CA1D3D4H5H6Hy7gyl_Hydroporus_gyllenhalii_1VWB.idba.4         | XXXXXXXXXXXXXX--XX---- | CA1D3D4H5H6Hy7gyl_Hydroporus_gyllenhalii_1VWB.idba.4_MERGED         |
| -XXX-----XX-X-          | CA1D3D4H5H6Hy7obs            | XXXXXXXXXXXXXX         | CA1D3D4H5H6Hy7obs_Hydroporus_obscurus_1VWB.idba.1            | XXXXXXXXXXXXXX-X-      | CA1D3D4H5H6Hy7obs_Hydroporus_obscurus_1VWB.idba.1_MERGED            |

|                       |                     |                      |                                                            |                          |                                                                   |
|-----------------------|---------------------|----------------------|------------------------------------------------------------|--------------------------|-------------------------------------------------------------------|
| -XX-----XX-XX-        | CA1D3D4H5H6Hy7pa1   | -----XXXXXX-XXXX     | CA1D3D4H5H6Hy7pa1_Hydropsorus_palustris_JX313670           | -XX-XXXXXXXXXX-XX-       | CA1D3D4H5H6Hy7pa1_Hydropsorus_palustris_JX313670_MERGED           |
| -XX-----XX-XX-        | CA1D3D4H5H6Hy7pla   | XXXXXXXXXXXXXXXXXXXX | CA1D3D4H5H6Hy7pla_Hydropsorus_planus_1VWB.idba.2           | XXXXXXXXXXXXXXXXXXXX     | CA1D3D4H5H6Hy7pla_Hydropsorus_planus_1VWB.idba.2_MERGED           |
| -XX-----X--XX-        | CA1D3D4H5Hyg6Hy7con | XXXXXXXXXXXXXXXXXXXX | CA1D3D4H5Hyg6Hy7con_Hygrotylus_confluens_1VWB.idba.7       | XXXXXXXXXXXXXXXXXXXX-XX- | CA1D3D4H5Hyg6Hy7con_Hygrotylus_confluens_1VWB.idba.7_MERGED       |
| -XX-----XX-XX-        | CA1D3D4H5Hyg6Hy7ina | XXXXXXXXXXXXXXXXXXXX | CA1D3D4H5Hyg6Hy7ina_Hygrotylus_inaequalis_1VWB.idba.10     | XXXXXXXXXXXXXXXXXXXX-XX- | CA1D3D4H5Hyg6Hy7ina_Hygrotylus_inaequalis_1VWB.idba.10_MERGED     |
| --X-----XX----        | CA1D3D4H5Hyg6Hy7nig | XXXXXXXXXXXXXXXXXXXX | CA1D3D4H5Hyg6Hy7nig_Hygrotylus_nigrolineatus_ameie.idba.11 | XXXXXXXXXXXXXXXXXXXX     | CA1D3D4H5Hyg6Hy7nig_Hygrotylus_nigrolineatus_ameie.idba.11_MERGED |
| -XX-----X-XX-XX-      | CA1D3D4L5L6La7poe   | XXXXXXXXXXXXXXXXXXXX | CA1D3D4L5L6La7poe_Laccophilus_poecilus_ameie.idba.8        | XXXXXXXXXXXXXXXXXXXX-XX- | CA1D3D4L5L6La7poe_Laccophilus_poecilus_ameie.idba.8_MERGED        |
| -XX-----X-X-X-XX-     | CA1D3H4Hy7her       | XXXXXXXXXXXXXXXXXXXX | CA1D3H4Hy7her_Hygrobia_hermanni_1VWB.idba.13               | XXXXXXXXXXXXXXXXXXXX-XX- | CA1D3H4Hy7her_Hygrobia_hermanni_1VWB.idba.13_MERGED               |
| --X-----X-XXX-XX-     | CA1D3M4Me7phy       | --XXXXXXXXXXXX-XXXX  | CA1D3M4Me7phy_Meru_phyllisae_JX313691                      | --XXXXXXXXXXXX-XX-XX-    | CA1D3M4Me7phy_Meru_phyllisae_JX313691_MERGED                      |
| -XXX-----X-XXX-XX-    | CA1D3N4Not7cla      | XXXXXXXXXXXXXXXXXXXX | CA1D3N4Not7cla_Noterus_clavicornis_1VWB.idba.5             | XXXXXXXXXXXXXXXXXXXX-XX- | CA1D3N4Not7cla_Noterus_clavicornis_1VWB.idba.5_MERGED             |
| XXXXXXXXXXXXX-X-X-XX- | CA1G3G4Ma7obl       | XXXXXXXXXXXXXXXXXXXX | CA1G3G4Ma7obl_Macrogyrus_oblongus_NC_013249                | XXXXXXXXXXXXXXXXXXXX     | CA1G3G4Ma7obl_Macrogyrus_oblongus_NC_013249_MERGED                |
| -X-----X-----XX-      | CA1H3H4Ha7fla       | XXXXXXXXXXXX-XXXX    | CA1H3H4Ha7fla_Haliplus_flavicollis_JX313677                | XXXXXXXXXXXXXXXXXXXX     | CA1H3H4Ha7fla_Haliplus_flavicollis_JX313677_MERGED                |
| -XX-----X-----XX-     | CA1H3H4Ha7imm       | -XXXXXXXXXX-XXXX     | CA1H3H4Ha7imm_Haliplus_immaculatus_1VWB.idba.22            | -XXXXXXXXXX-XXXX         | CA1H3H4Ha7imm_Haliplus_immaculatus_1VWB.idba.22_MERGED            |
| -XX-----X-X-X-XX-     | CA1H3H4Ha7lin       | XXXXXXXXXXXXXXXXXXXX | CA1H3H4Ha7lin_Haliplus_lineatocollis_1VWB.idba.6           | XXXXXXXXXXXXXXXXXXXX-XX- | CA1H3H4Ha7lin_Haliplus_lineatocollis_1VWB.idba.6_MERGED           |
| -X-----X-----XX-      | CA1H3H4Ha7sib       | XXXXXXXXXXXX-XXXX    | CA1H3H4Ha7sib_Haliplus_sibiricus_ameie.idba.110            | XXXXXXXXXXXX-XXXX        | CA1H3H4Ha7sib_Haliplus_sibiricus_ameie.idba.110_MERGED            |
| --X-----X-----XX-     | CA1H3H4Pe7qua       | --XXXXXXXXXX-XXXX    | CA1H3H4Pe7qua_Peltodytes_quadratius_JX313685               | --XXXXXXXXXX-XXXX        | CA1H3H4Pe7qua_Peltodytes_quadratius_JX313685_MERGED               |
| -X-----XX-XX-         | CAr1C4Pr7ser        | --XXXXXXXXXX-XXXX    | CAr1C4Pr7ser_Priacma_serrata_JX412806                      | -X-XXXXXXXXXX-XX-        | CAr1C4Pr7ser_Priacma_serrata_JX412806_MERGED                      |
| XXXXXXXXXXXXX-X-XX-   | CAr1O4Te7bru        | XXXXXXXXXXXXXXXXXXXX | CAr1O4Te7bru_Tetraperus_bruchi_NC_011328                   | XXXXXXXXXXXXXXXXXXXX     | CAr1O4Te7bru_Tetraperus_bruchi_NC_011328_MERGED                   |
| XXXXXXXXXXXXX-XX-     | CM1H4Hy7gra         | XXXXXXXXXXXXXXXXXXXX | CM1H4Hy7gra_Hydroscapha_granulum_NC_012144                 | XXXXXXXXXXXXXXXXXXXX     | CM1H4Hy7gra_Hydroscapha_granulum_NC_012144_MERGED                 |
| -X-----XX-XX-         | CM1T4In7mad         | XXXXXXXXXXXXXXXXXXXX | CM1T4In7mad_Incoltorrida_madagassica_670733_idba_contig_2  | XXXXXXXXXXXXXXXXXXXX     | CM1T4In7mad_Incoltorrida_madagassica_670733_idba_contig_2_MERGED  |
| -X-----X-----XX-      | CP1B3B4A5Ag7big     | --XXXXXXXXXX-XXXX    | CP1B3B4A5Ag7big_Agrilus_biguttatus_JX412786                | -X-XXXXXXXXXX-XX-        | CP1B3B4A5Ag7big_Agrilus_biguttatus_JX412786_MERGED                |
| -X-----X-XX-          | CP1B3B4A5Tr7tro     | XXXXXXXXXXXX-XXXX    | CP1B3B4A5Tr7tro_Trachys_trogodytiformis_ameie.idba.40      | XXXXXXXXXXXX-XX-XX-      | CP1B3B4A5Tr7tro_Trachys_trogodytiformis_ameie.idba.40_MERGED      |
| XXXX-XXXXXXXX-X-XX-   | CP1B3B4C5Ch7ful     | XXXXXXXXXXXXXXXXXXXX | CP1B3B4C5Ch7ful_Chrysochroa_fulgidissima_NC_012765         | XXXXXXXXXXXXXXXXXXXX     | CP1B3B4C5Ch7ful_Chrysochroa_fulgidissima_NC_012765_MERGED         |
| -X-----X-----XX-      | CP1B3B4Ch5Pe7lug    | --XXXXXXXXXX-XXXX    | CP1B3B4Ch5Pe7lug_Perotis_lugubris_JX412762                 | -X-XXXXXXXXXX-XXXX       | CP1B3B4Ch5Pe7lug_Perotis_lugubris_JX412762_MERGED                 |
| -X-----X-----XX-      | CP1Bo3A4Ga7lae      | XXXXXXXXXXXX-XXXX    | CP1Bo3A4Ga7lae_Gastrallus_laevigatus_ameie.idba.78         | XXXXXXXXXXXX-XXXX        | CP1Bo3A4Ga7lae_Gastrallus_laevigatus_ameie.idba.78_MERGED         |
| -X-----X-----XX-      | CP1Bo3A4La7red      | XXXXXXXXXXXXXXXXXXXX | CP1Bo3A4La7red_Lasioderma_redtenbacheri_ameie.idba.91      | XXXXXXXXXXXXXXXXXXXX     | CP1Bo3A4La7red_Lasioderma_redtenbacheri_ameie.idba.91_MERGED      |
| XXXXXXXXXXXXX-X-X-XX- | CP1Bo3B4B5Ap7for    | XXXXXXXXXXXXXXXXXXXX | CP1Bo3B4B5Ap7for_Apatides_fortis_NC_013582                 | XXXXXXXXXXXXXXXXXXXX     | CP1Bo3B4B5Ap7for_Apatides_fortis_NC_013582_MERGED                 |
| -X-----X-----XX-      | CP1Bo3B4D5D17min    | XXXXXXXXXXXX-XXXX    | CP1Bo3B4D5D17min_Dinoderus_minutus_ameie.idba.76           | XXXXXXXXXXXX-XXXX        | CP1Bo3B4D5D17min_Dinoderus_minutus_ameie.idba.76_MERGED           |
| -XX-----X-----XX-     | CP1Bo3D4An7ver      | XXXXXXXXXXXX-XXXX    | CP1Bo3D4An7ver_Anthrenus_verbasci_ameie.idba.111           | XXXXXXXXXX-X-XX-         | CP1Bo3D4An7ver_Anthrenus_verbasci_ameie.idba.111_MERGED           |
| -XX-----XX-XXX        | CP1Bo3D4De7per      | --XXXXXXXXXX-XXXX    | CP1Bo3D4De7per_Dermestes_peruvianus_JX313683               | -XXXXXXXXXXXX-XXX        | CP1Bo3D4De7per_Dermestes_peruvianus_JX313683_MERGED               |
| -----XX-XX-           | CP1Bo3D4Tr7hir      | --XXXXXXXXXX-XXXX    | CP1Bo3D4Tr7hir_Trinodes_hirtus_JX313664                    | --XXXXXXXXXX-XX-         | CP1Bo3D4Tr7hir_Trinodes_hirtus_JX313664_MERGED                    |
| -X-----XX-XX-         | CP1Bo3N4No7fas      | XXXXXXXXXXXXXXXXXXXX | CP1Bo3N4No7fas_Nosodendron_fasciculare_ameie.idba.85       | XXXXXXXXXXXXXXXXXXXX     | CP1Bo3N4No7fas_Nosodendron_fasciculare_ameie.idba.85_MERGED       |
| -X-----X-----XX-      | CP1Bo3P4Nip7hol     | XXXXXX-XXXX          | CP1Bo3P4Nip7hol_Niptus_hololeucus_ameie.idba.138           | XXXXXX-XXXX              | CP1Bo3P4Nip7hol_Niptus_hololeucus_ameie.idba.138_MERGED           |
| -X-----X-----XX-      | CP1Bo3P4Pt7ruf      | --XXXXXXXXXX-XXXX    | CP1Bo3P4Pt7ruf_Ptinus_rufipes_HQ232819                     | --XXXXXXXXXX-XXXX        | CP1Bo3P4Pt7ruf_Ptinus_rufipes_HQ232819_MERGED                     |
| -X-----X-----XX-      | CP1By3D4Dr7ern      | XXXXXXXXXXXXXXXXXXXX | CP1By3D4Dr7ern_Dryops_ernesti_833433_idba_contig_9         | XXXXXXXXXXXXXXXXXXXX     | CP1By3D4Dr7ern_Dryops_ernesti_833433_idba_contig_9_MERGED         |
| -XX-----XX-XX-        | CP1By3D4Dr7lur      | XXXXXXXXXXXXXXXXXXXX | CP1By3D4Dr7lur_Dryops_luridus_1VWB.idba.12                 | XXXXXXXXXXXXXXXXXXXX     | CP1By3D4Dr7lur_Dryops_luridus_1VWB.idba.12_MERGED                 |
| -X-----XX-XXX         | CP1By3E4E5L17per    | --XXXXXXXXXX-XXXX    | CP1By3E4E5L17per_Limnius_perrisi_JX412747                  | --XXXXXXXXXXXX-XXX       | CP1By3E4E5L17per_Limnius_perrisi_JX412747_MERGED                  |
| -X-----XX-X-XX-       | CP1By3H4He7fen      | --XXXXXXXXXX-XXXX    | CP1By3H4He7fen_Heterocerus_fenestratus_HQ232811            | -XXXXXXXXXXXXX-X-XX-     | CP1By3H4He7fen_Heterocerus_fenestratus_HQ232811_MERGED            |
| -X-----X-----XX-      | CP1By3H4He7par      | XXXXXXXXXXXXXXXXXXXX | CP1By3H4He7par_Heterocerus_parallelus_ameie.idba.47        | XXXXXXXXXXXXXXXXXXXX     | CP1By3H4He7par_Heterocerus_parallelus_ameie.idba.47_MERGED        |
| -XX-----XX-XXX        | CP1C3C4Tr7leu       | XXXXXX-XXXX          | CP1C3C4Tr7leu_Trichodes_leucopsidens_ameie.idba.184        | XXXXXX-XXXX-XX-XXX       | CP1C3C4Tr7leu_Trichodes_leucopsidens_ameie.idba.184_MERGED        |
| XXXXXXXXXXXXX-XX-     | CP1C3M4C5Ch7sca     | XXXXXXXXXXXXXXXXXXXX | CP1C3M4C5Ch7sca_Chaetosoma_scaritides_NC_011324            | XXXXXXXXXXXXXXXXXXXX     | CP1C3M4C5Ch7sca_Chaetosoma_scaritides_NC_011324_MERGED            |
| -X-----XX-XXX         | CP1C3P4Ph7edw       | XXXXXXXXXXXXXXXXXXXX | CP1C3P4Ph7edw_Phloiophilus_edwardsi_JX412815               | XXXXXXXXXXXXXXXXXXXX-XXX | CP1C3P4Ph7edw_Phloiophilus_edwardsi_JX412815_MERGED               |
| -----XX-XX-           | CP1C3T4T5Tem7vir    | XXXXXXXXXXXXXXXXXXXX | CP1C3T4T5Tem7vir_Temnoscheila_virescens_JX412752           | XXXXXXXXXXXXXXXXXXXX-XXX | CP1C3T4T5Tem7vir_Temnoscheila_virescens_JX412752_MERGED           |
| -X-----XXX-XX-        | CP1Ch3C4C5C6Ch7ame  | -----XXXXXXXXXX-XXXX | CP1Ch3C4C5C6Ch7ame_Chrysolina_americanus_Chryso.idba.155   | -X-XXXXXX-XX-            | CP1Ch3C4C5C6Ch7ame_Chrysolina_americanus_Chryso.idba.155_MERGED   |
| -XX-----XXX-X-        | CP1Ch3C4C5C6Ch7ban  | XXXXXXXXXXXXXXXXXXXX | CP1Ch3C4C5C6Ch7ban_Chrysolina_bankii_Chryso.idba.17        | XXXXXXXXXXXXXXXXXXXX-XX- | CP1Ch3C4C5C6Ch7ban_Chrysolina_bankii_Chryso.idba.17_MERGED        |
| -XX-----XXX-XX-       | CP1Ch3C4C5C6Ch7hae  | XXXXXXXXXXXXXXXXXXXX | CP1Ch3C4C5C6Ch7hae_Chrysolina_haemoptera_Chryso.idba.38    | XXXXXXXXXXXXXXXXXXXX-XX- | CP1Ch3C4C5C6Ch7hae_Chrysolina_haemoptera_Chryso.idba.38_MERGED    |
| -XX-----XXX-XX-       | CP1Ch3C4C5C6Ch7her  | XXXXXXXXXXXXXXXXXXXX | CP1Ch3C4C5C6Ch7her_Chrysolina_herbaea_Chryso.idba.10       | XXXXXXXXXXXXXXXXXXXX     | CP1Ch3C4C5C6Ch7her_Chrysolina_herbaea_Chryso.idba.10_MERGED       |
| -XX-----XXX-XX-       | CP1Ch3C4C5C6Ch7hyp  | --XXXXXXXXXX-XXXX    | CP1Ch3C4C5C6Ch7hyp_Chrysolina_hyperici_Chryso.idba.134     | --XXXXXXXXXXXX-XX-       | CP1Ch3C4C5C6Ch7hyp_Chrysolina_hyperici_Chryso.idba.134_MERGED     |
| -----XXX-XX-          | CP1Ch3C4C5C6Ch7lep  | XXXXXX-XXXX          | CP1Ch3C4C5C6Ch7lep_Chrysolina_lepida_Chryso.idba.151       | XXXXXX-XXXX-XX-XX-       | CP1Ch3C4C5C6Ch7lep_Chrysolina_lepida_Chryso.idba.151_MERGED       |
| -XX-----XXX-XX-       | CP1Ch3C4C5C6Ch7pol  | XXXXXXXXXXXXXXXXXXXX | CP1Ch3C4C5C6Ch7pol_Chrysolina_polita_Chryso.idba.123       | XXXXXXXXXXXXXXXXXXXX     | CP1Ch3C4C5C6Ch7pol_Chrysolina_polita_Chryso.idba.123_MERGED       |
| -X-----X-----XX-      | CP1Ch3C4C5C6Ch7ruf  | XXXXXXXXXXXXXXXXXXXX | CP1Ch3C4C5C6Ch7ruf_Chrysolina_rufoaeana_Chryso.idba.131    | XXXXXXXXXXXX-XX-         | CP1Ch3C4C5C6Ch7ruf_Chrysolina_rufoaeana_Chryso.idba.131_MERGED    |
| -X-----XX-XX-         | CP1Ch3C4C5C6Ch7ver  | XXXXXXXXXXXXXXXXXXXX | CP1Ch3C4C5C6Ch7ver_Chrysolina_vernalis_Chryso.idba.25      | XXXXXXXXXXXXXXXXXXXX-XX- | CP1Ch3C4C5C6Ch7ver_Chrysolina_vernalis_Chryso.idba.25_MERGED      |
| -XXX-----X-XXX-XX-    | CP1Ch3C4C5C6Ch7pop  | XXXXXXXXXXXXXXXXXXXX | CP1Ch3C4C5C6Ch7pop_Chrysomela_populi_ameie.idba.70         | XXXXXXXXXXXXXXXXXXXX     | CP1Ch3C4C5C6Ch7pop_Chrysomela_populi_ameie.idba.70_MERGED         |
| -X-----X-----XX-      | CP1Ch3C4C5C6Col7bar | XXXXXXXXXXXXXXXXXXXX | CP1Ch3C4C5C6Col7bar_Colaspidea_barbarum_Chryso.idba.24     | XXXXXXXXXXXXXXXXXXXX-XX- | CP1Ch3C4C5C6Col7bar_Colaspidea_barbarum_Chryso.idba.24_MERGED     |
| -X-----X-----XX-      | CP1Ch3C4C5C6Go7aeg  | XXXXXXXXXXXXXXXXXXXX | CP1Ch3C4C5C6Go7aeg_Gonioctena_aegrotata_Chryso.idba.29     | XXXXXXXXXXXXXXXXXXXX-XX- | CP1Ch3C4C5C6Go7aeg_Gonioctena_aegrotata_Chryso.idba.29_MERGED     |
| -X-----X-----XX-      | CP1Ch3C4C5C6Go7lep  | XXXXXXXXXXXXXXXXXXXX | CP1Ch3C4C5C6Go7lep_Gonioctena_lepraeuri_Chryso.idba.15     | XXXXXXXXXXXXXXXXXXXX-XX- | CP1Ch3C4C5C6Go7lep_Gonioctena_lepraeuri_Chryso.idba.15_MERGED     |



|                   |                     |                      |                                                                  |                      |                                                                         |
|-------------------|---------------------|----------------------|------------------------------------------------------------------|----------------------|-------------------------------------------------------------------------|
| -XX-XXXX-XXX-XXX  | CP1Ch3C4C5C6Go7o1i  | XXXXXXXXXXXXX----    | CP1Ch3C4C5C6Go7o1i_Gonioctena_olivacea_Chryso.idba.3             | XXXXXXXXXXXXX-XX     | CP1Ch3C4C5C6Go7o1i_Gonioctena_olivacea_Chryso.idba.3_MERGED             |
| --X-XXXX-XXX-XX   | CP1Ch3C4C5C6Hy7fai  | XXXXXXXXXXXXX----    | CP1Ch3C4C5C6Hy7fai_Hydrothassa_fairmairei_Chryso.idba.12         | XXXXXXXXXXXXX-XX     | CP1Ch3C4C5C6Hy7fai_Hydrothassa_fairmairei_Chryso.idba.12_MERGED         |
| --X-XXXX-XX--XX   | CP1Ch3C4C5C6Hy7gla  | XXXXXXXXXXXXX----    | CP1Ch3C4C5C6Hy7gla_Hydrothassa_glabra_Chryso.idba.9              | XXXXXXXXXXXXX-XX     | CP1Ch3C4C5C6Hy7gla_Hydrothassa_glabra_Chryso.idba.9_MERGED              |
| -XXX-XXXX-XXXXXXX | CP1Ch3C4C5C6Li7aen  | XXXXXXXXXXXXX----    | CP1Ch3C4C5C6Li7aen_Plagiosterna_aenea_Chryso.idba.2              | XXXXXXXXXXXXX-XX     | CP1Ch3C4C5C6Li7aen_Plagiosterna_aenea_Chryso.idba.2_MERGED              |
| -XX-XXXX-XX--XXX  | CP1Ch3C4C5C6Ph7arm  | --XXXXXXXXXXXX-XXXX  | CP1Ch3C4C5C6Ph7arm_Phaedon_armoraciae_JX220992                   | -XXXXXXXXXXXX-XXX    | CP1Ch3C4C5C6Ph7arm_Phaedon_armoraciae_JX220992_MERGED                   |
| -X-XXXX-XX--XX    | CP1Ch3C4C5C6Ph7tum  | XXXXXXXXXXXXX----    | CP1Ch3C4C5C6Ph7tum_Phaedon_tumidulus_Chryso.idba.4               | XXXXXXXXXXXXX-XX     | CP1Ch3C4C5C6Ph7tum_Phaedon_tumidulus_Chryso.idba.4_MERGED               |
| -XXX-XXXX-XXXX--- | CP1Ch3C4C5C6Phr7vit | XXXXXXXXXXXXX----    | CP1Ch3C4C5C6Phr7vit_Phratora_vitellinae_Chryso.idba.79           | XXXXXXXXXXXXX-XX     | CP1Ch3C4C5C6Phr7vit_Phratora_vitellinae_Chryso.idba.79_MERGED           |
| -XX-XXXX-X--XX-   | CP1Ch3C4C5C6Phr7vul | XXXXXXXXXXXX-XXXX    | CP1Ch3C4C5C6Phr7vul_Phratora_vulgatissima_amie.idba.119          | XXXXXXXXXXXX-X--XX-  | CP1Ch3C4C5C6Phr7vul_Phratora_vulgatissima_amie.idba.119_MERGED          |
| -----XX-XXXX      | CP1Ch3C4C5E6En7ado  | XXXXXXXXXXXXX----    | CP1Ch3C4C5E6En7ado_Entomoscelis_adonidis_Chryso.idba.57          | XXXXXXXXXXXXX-XX     | CP1Ch3C4C5E6En7ado_Entomoscelis_adonidis_Chryso.idba.57_MERGED          |
| XXX-XXXX-XX----   | CP1Ch3C4C5T6Ti7goe  | -XXXXXXXXXXXX-XXXX   | CP1Ch3C4C5T6Ti7goe_Timarcha_goettingensis_JX412789               | -XXXXXXXXXXXX-XX---- | CP1Ch3C4C5T6Ti7goe_Timarcha_goettingensis_JX412789_MERGED               |
| -X-XXXX-XX--XXX   | CP1Ch3C4Ca5Ar7lab   | --XXXXXXXXXXXX-XXXX  | CP1Ch3C4Ca5Ar7lab_Arescus_labiatus_JX220988                      | --XXXXXXXXXXXX-XXX   | CP1Ch3C4Ca5Ar7lab_Arescus_labiatus_JX220988_MERGED                      |
| -XX-XXXX-X--XX-   | CP1Ch3C4Ca5Ca7den   | XXXXXXXXXXXXX----    | CP1Ch3C4Ca5Ca7den_Cassida_denticollis_Chryso.idba.59             | XXXXXXXXXXXXX-XX-    | CP1Ch3C4Ca5Ca7den_Cassida_denticollis_Chryso.idba.59_MERGED             |
| -XX-XXXX-XX--XXX  | CP1Ch3C4Ca5Ca7rub   | XXXXXXXXXXXXX----    | CP1Ch3C4Ca5Ca7rub_Cassida_rubiginosa_Chryso.idba.121             | XXXXXXXXXXXXX-XXX    | CP1Ch3C4Ca5Ca7rub_Cassida_rubiginosa_Chryso.idba.121_MERGED             |
| -XX-XXXX-X--XX-   | CP1Ch3C4Ca5Ca7vib   | --XXXXXXXXXXXX-XXXX  | CP1Ch3C4Ca5Ca7vib_Cassida_vibex_Chryso.idba.154                  | -XXXXXXXXXXXX-X--XX- | CP1Ch3C4Ca5Ca7vib_Cassida_vibex_Chryso.idba.154_MERGED                  |
| -XX-XXXX-X--XX-   | CP1Ch3C4Ca5Ca7vir   | XXXXXXXXXXXXX----    | CP1Ch3C4Ca5Ca7vir_Cassida_viridis_Chryso.idba.6                  | XXXXXXXXXXXXX-XX-    | CP1Ch3C4Ca5Ca7vir_Cassida_viridis_Chryso.idba.6_MERGED                  |
| --X-XXXX-XX--XXX  | CP1Ch3C4Ca5Im7cap   | --XXXXXXXXXXXX-XXXX  | CP1Ch3C4Ca5Im7cap_Imatidium_capense_JX220993                     | --XXXXXXXXXXXX-XXX   | CP1Ch3C4Ca5Im7cap_Imatidium_capense_JX220993_MERGED                     |
| --X-XXXX-X--XX-   | CP1Ch3C4C15Ch7obe   | XXXXXXXXXXXXX----    | CP1Ch3C4C15Ch7obe_Chilotomina_oberthuri_Chryso.idba.32           | XXXXXXXXXXXXX-XX-    | CP1Ch3C4C15Ch7obe_Chilotomina_oberthuri_Chryso.idba.32_MERGED           |
| -X-XXXX-X--XX-    | CP1Ch3C4C15La7gal   | XXXXXXXXXXXXX----    | CP1Ch3C4C15La7gal_Lachnaia_gallaeca_Chryso.idba.66               | XXXXXXXXXXXXX-XX-    | CP1Ch3C4C15La7gal_Lachnaia_gallaeca_Chryso.idba.66_MERGED               |
| -X-XXXX-X--XX-    | CP1Ch3C4C15La7hir   | XXXXXXXXXXXXX----    | CP1Ch3C4C15La7hir_Lachnaia_hirta_Chryso.idba.55                  | XXXXXXXXXXXXX-XX-    | CP1Ch3C4C15La7hir_Lachnaia_hirta_Chryso.idba.55_MERGED                  |
| -X-XXXX-X--XX-    | CP1Ch3C4C15La7pub   | XXXXXXXXXXXXX----    | CP1Ch3C4C15La7pub_Lachnaia_pubescens_Chryso.idba.36              | XXXXXXXXXXXXX-XX-    | CP1Ch3C4C15La7pub_Lachnaia_pubescens_Chryso.idba.36_MERGED              |
| --X-XXXX-XX--XXX  | CP1Ch3C4C15La7tri   | XXXXXXXXXXXXX----    | CP1Ch3C4C15La7tri_Lachnaia_tristigma_Chryso.idba.68              | XXXXXXXXXXXXX-XXX    | CP1Ch3C4C15La7tri_Lachnaia_tristigma_Chryso.idba.68_MERGED              |
| -----XX--XXX      | CP1Ch3C4C15Lab7ghi  | XXXXXXXXXXXXX----    | CP1Ch3C4C15Lab7ghi_Labidostomis_ghiliani_Chryso.idba.91          | XXXXXXXXXXXXX-XX-    | CP1Ch3C4C15Lab7ghi_Labidostomis_ghiliani_Chryso.idba.91_MERGED          |
| -X-XXXX-X--XX-    | CP1Ch3C4C15Lab7luc  | XXXXXXXXXXXXX----    | CP1Ch3C4C15Lab7luc_Labidostomis_lucida_Chryso.idba.90            | XXXXXXXXXXXXX-XX-    | CP1Ch3C4C15Lab7luc_Labidostomis_lucida_Chryso.idba.90_MERGED            |
| -----XX--XXX      | CP1Ch3C4C15Lab7lus  | XXXXXXXXXXXXX----    | CP1Ch3C4C15Lab7lus_Labidostomis_lusitanica_Chryso.idba.65        | XXXXXXXXXXXXX-XXX    | CP1Ch3C4C15Lab7lus_Labidostomis_lusitanica_Chryso.idba.65_MERGED        |
| -----XX--XXX      | CP1Ch3C4C15Lab7tax  | XXXXXXXXXXXXX----    | CP1Ch3C4C15Lab7tax_Labidostomis_taxicornis_Chryso.idba.92        | XXXXXXXXXXXXX-XX-    | CP1Ch3C4C15Lab7tax_Labidostomis_taxicornis_Chryso.idba.92_MERGED        |
| -X-XXXX-XX--XXX   | CP1Ch3C4C15Sm7con   | XXXXXXXXXXXXX----    | CP1Ch3C4C15Sm7con_Smaragdina_concolor_Chryso.idba.37             | XXXXXXXXXXXXX-XXX    | CP1Ch3C4C15Sm7con_Smaragdina_concolor_Chryso.idba.37_MERGED             |
| -X-XXXX-XX--XXX   | CP1Ch3C4C15Sm7rey   | XXXXXXXXXXXXX----    | CP1Ch3C4C15Sm7rey_Smaragdina_reyi_Chryso.idba.52                 | XXXXXXXXXXXXX-XXX    | CP1Ch3C4C15Sm7rey_Smaragdina_reyi_Chryso.idba.52_MERGED                 |
| -X-XXXX-X--XX-    | CP1Ch3C4C15Sm7ruf   | XXXXXXXXXXXXX----    | CP1Ch3C4C15Sm7ruf_Smaragdina_rufimana_Chryso.idba.20             | XXXXXXXXXXXXX-XX-    | CP1Ch3C4C15Sm7ruf_Smaragdina_rufimana_Chryso.idba.20_MERGED             |
| XXXXXXXXXXXXX-X-  | CP1Ch3C4Cr5Cr7duo   | XXXXXXXXXXXXX----    | CP1Ch3C4Cr5Cr7duo_Crioceris_duodecimpunctata_NC_003372           | XXXXXXXXXXXXX-X-     | CP1Ch3C4Cr5Cr7duo_Crioceris_duodecimpunctata_NC_003372_MERGED           |
| -X-XXXX-XX--XXX   | CP1Ch3C4Cr5Ou7gal   | XXXXXXXXXXXXX----    | CP1Ch3C4Cr5Ou7gal_Oulema_gallaeciana_Chryso.idba.130             | XXXXXXXXXXXXX-XX-    | CP1Ch3C4Cr5Ou7gal_Oulema_gallaeciana_Chryso.idba.130_MERGED             |
| -XX-XXXX-X--XXX   | CP1Ch3C4Cr5Ou7mel   | XXXXXXXXXXXXX----    | CP1Ch3C4Cr5Ou7mel_Oulema_melanopus_Chryso.idba.13                | XXXXXXXXXXXXX-XXX    | CP1Ch3C4Cr5Ou7mel_Oulema_melanopus_Chryso.idba.13_MERGED                |
| -XX-XXXX-X--XXX   | CP1Ch3C4Cry5Cr7and  | XXXXXXXXXXXXX----    | CP1Ch3C4Cry5Cr7and_Cryptocephalus_androgyne_Chryso.idba.100      | XXXXXXXXXXXXX-XX-    | CP1Ch3C4Cry5Cr7and_Cryptocephalus_androgyne_Chryso.idba.100_MERGED      |
| -XX-XXXX-X--XXX   | CP1Ch3C4Cry5Cr7aur  | XXXXXXXXXXXXX----    | CP1Ch3C4Cry5Cr7aur_Cryptocephalus_aureolus_Chryso.idba.54        | XXXXXXXXXXXXX-XX-    | CP1Ch3C4Cry5Cr7aur_Cryptocephalus_aureolus_Chryso.idba.54_MERGED        |
| -XX-XXXX-X-XXX-   | CP1Ch3C4Cry5Cr7bip  | XXXXXXXXXXXXX----    | CP1Ch3C4Cry5Cr7bip_Cryptocephalus_bipunctatus_Chryso.idba.99     | XXXXXXXXXXXXX-XXX    | CP1Ch3C4Cry5Cr7bip_Cryptocephalus_bipunctatus_Chryso.idba.99_MERGED     |
| -X-XXXX-X-X-XX-   | CP1Ch3C4Cry5Cr7can  | XXXXXXXXXXXXX----    | CP1Ch3C4Cry5Cr7can_Cryptocephalus_cantabricus_Chryso.idba.87     | XXXXXXXXXXXXX-XX-    | CP1Ch3C4Cry5Cr7can_Cryptocephalus_cantabricus_Chryso.idba.87_MERGED     |
| -X-XXXX-XX--XXX   | CP1Ch3C4Cry5Cr7cel  | XXXXXXXXXXXXX----    | CP1Ch3C4Cry5Cr7cel_Cryptocephalus_celtibericus_Chryso.idba.56    | XXXXXXXXXXXXX-XX-    | CP1Ch3C4Cry5Cr7cel_Cryptocephalus_celtibericus_Chryso.idba.56_MERGED    |
| -X-XXXX-X-X-XX-   | CP1Ch3C4Cry5Cr7cyn  | XXXXXXXXXXXXX----    | CP1Ch3C4Cry5Cr7cyn_Cryptocephalus_cynarae_Chryso.idba.63         | XXXXXXXXXXXXX-XX-    | CP1Ch3C4Cry5Cr7cyn_Cryptocephalus_cynarae_Chryso.idba.63_MERGED         |
| -X-XXXX-X--XX-    | CP1Ch3C4Cry5Cr7liv  | XXXXXXXXXXXXX----    | CP1Ch3C4Cry5Cr7liv_Cryptocephalus_lividimanus_Chryso.idba.85     | XXXXXXXXXXXXX-XX-    | CP1Ch3C4Cry5Cr7liv_Cryptocephalus_lividimanus_Chryso.idba.85_MERGED     |
| -XX-XXXX-XXXX-    | CP1Ch3C4Cry5Cr7mor  | XXXXXXXXXXXXX----    | CP1Ch3C4Cry5Cr7mor_Cryptocephalus_moraei_Chryso.idba.107         | XXXXXXXXXXXXX-XXX    | CP1Ch3C4Cry5Cr7mor_Cryptocephalus_moraei_Chryso.idba.107_MERGED         |
| --X-XXXX-X--XX-   | CP1Ch3C4Cry5Cr7mys  | XXXXXXXXXXXXX----    | CP1Ch3C4Cry5Cr7mys_Cryptocephalus_mystacatus_Chryso.idba.41      | XXXXXXXXXXXXX-XX-    | CP1Ch3C4Cry5Cr7mys_Cryptocephalus_mystacatus_Chryso.idba.41_MERGED      |
| -X-XXXX-X--XX-    | CP1Ch3C4Cry5Cr7obl  | XXXXXXXXXXXXX----    | CP1Ch3C4Cry5Cr7obl_Cryptocephalus_obliteratifer_Chryso.idba.104  | XXXXXXXXXXXXX-XX-    | CP1Ch3C4Cry5Cr7obl_Cryptocephalus_obliteratifer_Chryso.idba.104_MERGED  |
| -XX-XXXX-X-X-XX-  | CP1Ch3C4Cry5Cr7oct  | XXXXXXXXXXXXX----    | CP1Ch3C4Cry5Cr7oct_Cryptocephalus_octoguttatus_Chryso.idba.124   | XXXXXXXXXXXXX-XX-    | CP1Ch3C4Cry5Cr7oct_Cryptocephalus_octoguttatus_Chryso.idba.124_MERGED   |
| -X-XXXX-X-X-XX-   | CP1Ch3C4Cry5Cr7pom  | XXXXXXXXXXXXX----    | CP1Ch3C4Cry5Cr7pom_Cryptocephalus_pominorum_Chryso.idba.94       | XXXXXXXXXXXXX-XX-    | CP1Ch3C4Cry5Cr7pom_Cryptocephalus_pominorum_Chryso.idba.94_MERGED       |
| -XX-XXXX-XXXX-    | CP1Ch3C4Cry5Cr7pus  | XXXXXXXXXXXXX----    | CP1Ch3C4Cry5Cr7pus_Cryptocephalus_pusillus_Chryso.idba.53        | XXXXXXXXXXXXX-XX-    | CP1Ch3C4Cry5Cr7pus_Cryptocephalus_pusillus_Chryso.idba.53_MERGED        |
| -X-XXXX-X--XXX    | CP1Ch3C4Cry5Cr7qua  | XXXXXXXXXXXXX----    | CP1Ch3C4Cry5Cr7qua_Cryptocephalus_quadripunctatus_Chryso.idba.83 | XXXXXXXXXXXXX-XX-    | CP1Ch3C4Cry5Cr7qua_Cryptocephalus_quadripunctatus_Chryso.idba.83_MERGED |
| -X-XXXX-X-X-XX-   | CP1Ch3C4Cry5Cr7ram  | XXXXXXXXXXXXX----    | CP1Ch3C4Cry5Cr7ram_Cryptocephalus_ramburii_Chryso.idba.88        | XXXXXXXXXXXXX-XX-    | CP1Ch3C4Cry5Cr7ram_Cryptocephalus_ramburii_Chryso.idba.88_MERGED        |
| -X-XXXX-XXXX-     | CP1Ch3C4Cry5Cr7ruf  | XXXXXXXXXXXXX----    | CP1Ch3C4Cry5Cr7ruf_Cryptocephalus_rufipes_Chryso.idba.77         | XXXXXXXXXXXXX-XX-    | CP1Ch3C4Cry5Cr7ruf_Cryptocephalus_rufipes_Chryso.idba.77_MERGED         |
| -X-XXXX-X-X-XX-   | CP1Ch3C4Cry5Cr7rug  | XXXXXXXXXXXXX----    | CP1Ch3C4Cry5Cr7rug_Cryptocephalus_rugicollis_Chryso.idba.95      | XXXXXXXXXXXXX-XX-    | CP1Ch3C4Cry5Cr7rug_Cryptocephalus_rugicollis_Chryso.idba.95_MERGED      |
| -X-XXXX-X--XX-    | CP1Ch3C4Cry5Cr7sau  | XXXXXXXXXXXX-XX-XXXX | CP1Ch3C4Cry5Cr7sau_Cryptocephalus_saucius_Chryso.idba.143        | XXXXXXXXXXXX-X-X-XX- | CP1Ch3C4Cry5Cr7sau_Cryptocephalus_saucius_Chryso.idba.143_MERGED        |
| -X-XXXX-XXXX-     | CP1Ch3C4Cry5Cr7sch  | XXXXXXXXXXXXX----    | CP1Ch3C4Cry5Cr7sch_Cryptocephalus_schaefferi_Chryso.idba.49      | XXXXXXXXXXXXX-XX-    | CP1Ch3C4Cry5Cr7sch_Cryptocephalus_schaefferi_Chryso.idba.49_MERGED      |
| -X-XXXX-X-X-XX-   | CP1Ch3C4Cry5Cr7tib  | XXXXXXXXXXXXX----    | CP1Ch3C4Cry5Cr7tib_Cryptocephalus_tibialis_Chryso.idba.101       | XXXXXXXXXXXXX-XX-    | CP1Ch3C4Cry5Cr7tib_Cryptocephalus_tibialis_Chryso.idba.101_MERGED       |
| -XX-XXXX-X--XX-   | CP1Ch3C4Cry5Cr7vit  | XXXXXXXXXXXXX----    | CP1Ch3C4Cry5Cr7vit_Cryptocephalus_vittatus_Chryso.idba.81        | XXXXXXXXXXXXX-XX-    | CP1Ch3C4Cry5Cr7vit_Cryptocephalus_vittatus_Chryso.idba.81_MERGED        |
| -XX-XXXX-X--XX-   | CP1Ch3C4Cry5Pa7reg  | XXXXXXXXXXXX-XXXX    | CP1Ch3C4Cry5Pa7reg_Pachybrachis_regius_Chryso.idba.138           | XXXXXXXXXXXX-X--XX-  | CP1Ch3C4Cry5Pa7reg_Pachybrachis_regius_Chryso.idba.138_MERGED           |
| -X-XXXX-X--XX-    | CP1Ch3C4Cry5Pa7suf  | XXXXXXXXXXXXX----    | CP1Ch3C4Cry5Pa7suf_Pachybrachis_suffriani_Chryso.idba.98         | XXXXXXXXXXXXX-XX-    | CP1Ch3C4Cry5Pa7suf_Pachybrachis_suffriani_Chryso.idba.98_MERGED         |
| -X-XXXX-XXXX-     | CP1Ch3C4Cry5Pa7ter  | XXXXXXXXXXXXX----    | CP1Ch3C4Cry5Pa7ter_Pachybrachis_terminalis_Chryso.idba.96        | XXXXXXXXXXXXX-XX-    | CP1Ch3C4Cry5Pa7ter_Pachybrachis_terminalis_Chryso.idba.96_MERGED        |

|                 |                      |                     |                                                              |                      |                                                                     |
|-----------------|----------------------|---------------------|--------------------------------------------------------------|----------------------|---------------------------------------------------------------------|
| --X-----X--XX-  | CP1Ch3C4Cry5St7ili   | XXXXXXXXXXXXX----   | CP1Ch3C4Cry5St7ili_Stylosomus_illicicola_Soil.idba.48        | XXXXXXXXXXXXX-XX-    | CP1Ch3C4Cry5St7ili_Stylosomus_illicicola_Soil.idba.48_MERGED        |
| --X-----X--XX-  | CP1Ch3C4Cry5St7rug   | XXXXXXXXXXXXX----   | CP1Ch3C4Cry5St7rug_Stylosomus_rugithorax_Chryso.idba.39      | XXXXXXXXXXXXX-XX-    | CP1Ch3C4Cry5St7rug_Stylosomus_rugithorax_Chryso.idba.39_MERGED      |
| --X-----XX-XXX- | CP1Ch3C4Do7dis       | ---XXXXXXXXXX----   | CP1Ch3C4Do7dis_Donacia_distincta_JX220999                    | --XXXXXXXXXXXXX-XXX- | CP1Ch3C4Do7dis_Donacia_distincta_JX220999_MERGED                    |
| --X-----X---    | CP1Ch3C4Do7ful       | XXXXXXXXXXXXX----   | CP1Ch3C4Do7ful_Doryidomorpha_fulva_CS.idba.19                | XXXXXXXXXXXXX-XX-    | CP1Ch3C4Do7ful_Doryidomorpha_fulva_CS.idba.19_MERGED                |
| -X-----X--XXX   | CP1Ch3C4E5Br7obs     | XXXXXXXXXXXXX----   | CP1Ch3C4E5Br7obs_Bromius_obscurus_ame.idba.82                | XXXXXXXXXXXXX--XXX   | CP1Ch3C4E5Br7obs_Bromius_obscurus_ame.idba.82_MERGED                |
| --X-----X--XX-  | CP1Ch3C4E5Colas7glo  | XXXXXXXXXXXXX----   | CP1Ch3C4E5Colas7glo_Colaspdea_globosa_Chryso.idba.110        | XXXXXXXXXXXXX-XX-    | CP1Ch3C4E5Colas7glo_Colaspdea_globosa_Chryso.idba.110_MERGED        |
| --X-----XX-XXX  | CP1Ch3C4E5Phy7dil    | -----XXXXXXXXXX---- | CP1Ch3C4E5Phy7dil_Phytorus_dilatatus_B480tru.idba.116        | --X-----XXXXXXX-XXX  | CP1Ch3C4E5Phy7dil_Phytorus_dilatatus_B480tru.idba.116_MERGED        |
| --X-----X--XXX  | CP1Ch3C4Ex7can       | --XXXXXXXXXXXXX---- | CP1Ch3C4Ex7can_Exema_canadensis_JX220990                     | --XXXXXXXXXXXXX--XXX | CP1Ch3C4Ex7can_Exema_canadensis_JX220990_MERGED                     |
| -----XXX        | CP1Ch3C4G5A6Ac7ass   | XXXXXXXXXXXXX----   | CP1Ch3C4G5A6Ac7ass_Acrocrypta_assamensis_CS.idba.43          | XXXXXXXXXXXXX-XXX    | CP1Ch3C4G5A6Ac7ass_Acrocrypta_assamensis_CS.idba.43_MERGED          |
| XXX-----X--XX-  | CP1Ch3C4G5A6Alt7amp  | XXXXXXX-----        | CP1Ch3C4G5A6Alt7amp_Altica_ampelophaga_Chryso.idba.149       | XXXXXXXXXX--X--XX-   | CP1Ch3C4G5A6Alt7amp_Altica_ampelophaga_Chryso.idba.149_MERGED       |
| -XX-----X--XX-  | CP1Ch3C4G5A6Alt7eri  | XXXXXXXX-----       | CP1Ch3C4G5A6Alt7eri_Altica_ericeti_Chryso.idba.163           | XXXXXXXXXX--X--XX-   | CP1Ch3C4G5A6Alt7eri_Altica_ericeti_Chryso.idba.163_MERGED           |
| -XXX-----       | CP1Ch3C4G5A6Alt7ole  | XXXXXXXXXXXXX----   | CP1Ch3C4G5A6Alt7ole_Altica_oleracea_Chryso.idba.51           | XXXXXXXXXXXXX-XX-    | CP1Ch3C4G5A6Alt7ole_Altica_oleracea_Chryso.idba.51_MERGED           |
| -XX-----X--XXX  | CP1Ch3C4G5A6Ap7orb   | XXXXXXXXXXXXX----   | CP1Ch3C4G5A6Ap7orb_Apteropeda_orbiculata_Chryso.idba.18      | XXXXXXXXXXXXX-XX-    | CP1Ch3C4G5A6Ap7orb_Apteropeda_orbiculata_Chryso.idba.18_MERGED      |
| -XX-----X--XX-  | CP1Ch3C4G5A6Ap7ovu   | XXXXXXXXXXXXX----   | CP1Ch3C4G5A6Ap7ovu_Apteropeda_ovulum_Chryso.idba.23          | XXXXXXXXXXXXX-XX-    | CP1Ch3C4G5A6Ap7ovu_Apteropeda_ovulum_Chryso.idba.23_MERGED          |
| -----XX--XXX    | CP1Ch3C4G5A6Aph7col  | XXXXXXXXXXXXX----   | CP1Ch3C4G5A6Aph7col_Aphthonomorpha_collaris_ChrysoT.idba.34  | XXXXXXXXXXXXX-XXX    | CP1Ch3C4G5A6Aph7col_Aphthonomorpha_collaris_ChrysoT.idba.34_MERGED  |
| -----X--XX-     | CP1Ch3C4G5A6Aph7alb  | XXXXXXXXXXXXX----   | CP1Ch3C4G5A6Aph7alb_Aphthona_albertinae_Chryso.idba.48       | XXXXXXXXXXXXX-XX-    | CP1Ch3C4G5A6Aph7alb_Aphthona_albertinae_Chryso.idba.48_MERGED       |
| -XX-----X--XX-  | CP1Ch3C4G5A6Aph7eup  | XXXXXXXXXXXXX----   | CP1Ch3C4G5A6Aph7eup_Aphthona_euphorbiae_Chryso.idba.42       | XXXXXXXXXXXXX-XX-    | CP1Ch3C4G5A6Aph7eup_Aphthona_euphorbiae_Chryso.idba.42_MERGED       |
| -XX-----X-XX--  | CP1Ch3C4G5A6Aph7lut  | XXXXXXXXXXXXX----   | CP1Ch3C4G5A6Aph7lut_Aphthona_lutescens_Chryso.idba.103       | XXXXXXXXXXXXX-XX-    | CP1Ch3C4G5A6Aph7lut_Aphthona_lutescens_Chryso.idba.103_MERGED       |
| -X-----X--XX-   | CP1Ch3C4G5A6Aph7mel  | XXXXXXXXXXXXX----   | CP1Ch3C4G5A6Aph7mel_Aphthona_melancholica_Chryso.idba.71     | XXXXXXXXXXXXX-XX-    | CP1Ch3C4G5A6Aph7mel_Aphthona_melancholica_Chryso.idba.71_MERGED     |
| -X-----XX-XXX   | CP1Ch3C4G5A6As17tra  | XXXXXXXXXXXXX----   | CP1Ch3C4G5A6As17tra_Asiorestia_transversa_ChrysoT.idba.7     | XXXXXXXXXXXXX-XXX    | CP1Ch3C4G5A6As17tra_Asiorestia_transversa_ChrysoT.idba.7_MERGED     |
| -X-----X--XX-   | CP1Ch3C4G5A6Ba7aer   | XXXXXXXXXXXXX----   | CP1Ch3C4G5A6Ba7aer_Batophila_aerata_Chryso.idba.47           | XXXXXXXXXXXXX-XX-    | CP1Ch3C4G5A6Ba7aer_Batophila_aerata_Chryso.idba.47_MERGED           |
| -X-----XXX      | CP1Ch3C4G5A6Ch7ang   | XXXXXXXXXXXXX----   | CP1Ch3C4G5A6Ch7ang_Chabria_nr_angulicollis_ChrysoT.idba.36   | XXXXXXXXXXXXX-XXX    | CP1Ch3C4G5A6Ch7ang_Chabria_nr_angulicollis_ChrysoT.idba.36_MERGED   |
| -----X--XX-     | CP1Ch3C4G5A6Chae7ari | XXXXXXXXXXXXX----   | CP1Ch3C4G5A6Chae7ari_Chaetocnema_arida_Chryso.idba.82        | XXXXXXXXXXXXX-XX-    | CP1Ch3C4G5A6Chae7ari_Chaetocnema_arida_Chryso.idba.82_MERGED        |
| -X-----X--XX-   | CP1Ch3C4G5A6Chae7dep | XXXXXXXXXXXXX----   | CP1Ch3C4G5A6Chae7dep_Chaetocnema_depressa_Chryso.idba.43     | XXXXXXXXXXXXX-XX-    | CP1Ch3C4G5A6Chae7dep_Chaetocnema_depressa_Chryso.idba.43_MERGED     |
| -XX-----XX-     | CP1Ch3C4G5A6Chae7hor | XXXXXXXXXXXXX----   | CP1Ch3C4G5A6Chae7hor_Chaetocnema_hortensis_Chryso.idba.125   | XXXXXXXXXXXXX-XX-    | CP1Ch3C4G5A6Chae7hor_Chaetocnema_hortensis_Chryso.idba.125_MERGED   |
| -X-----XX-      | CP1Ch3C4G5A6Chae7obe | XXXXXXXXXXXXX----   | CP1Ch3C4G5A6Chae7obe_Chaetocnema_obesa_Chryso.idba.93        | XXXXXXXXXXXXX-XX-    | CP1Ch3C4G5A6Chae7obe_Chaetocnema_obesa_Chryso.idba.93_MERGED        |
| -X-----X--XX-   | CP1Ch3C4G5A6Chae7pag | XXXXXXXXXXXXX----   | CP1Ch3C4G5A6Chae7pag_Chaetocnema_paganettii_Chryso.idba.78   | XXXXXXXXXXXXX-XX-    | CP1Ch3C4G5A6Chae7pag_Chaetocnema_paganettii_Chryso.idba.78_MERGED   |
| -X-----XX-      | CP1Ch3C4G5A6Chae7pel | XXXXXXXXXXXXX----   | CP1Ch3C4G5A6Chae7pel_Chaetocnema_pelagica_Chryso.idba.21     | XXXXXXXXXXXXX-XX-    | CP1Ch3C4G5A6Chae7pel_Chaetocnema_pelagica_Chryso.idba.21_MERGED     |
| -----X--XX-     | CP1Ch3C4G5A6Chae7sch | XXXXXXXXXXXXX----   | CP1Ch3C4G5A6Chae7sch_Chaetocnema_scheffleri_Chryso.idba.69   | XXXXXXXXXXXXX-XX-    | CP1Ch3C4G5A6Chae7sch_Chaetocnema_scheffleri_Chryso.idba.69_MERGED   |
| -XX-----X--XX-  | CP1Ch3C4G5A6Chae7tib | XXXXXXXXXXXXX----   | CP1Ch3C4G5A6Chae7tib_Chaetocnema_tibialis_Chryso.idba.75     | XXXXXXXXXXXXX-XX-    | CP1Ch3C4G5A6Chae7tib_Chaetocnema_tibialis_Chryso.idba.75_MERGED     |
| -X-----XX-XXX   | CP1Ch3C4G5A6Chal7ful | -----XXXXXXXXXX---- | CP1Ch3C4G5A6Chal7ful_Chalcoides_fulvicornis_Chryso.idba.153  | --X---XXXXXXXXXX-XXX | CP1Ch3C4G5A6Chal7ful_Chalcoides_fulvicornis_Chryso.idba.153_MERGED  |
| -X-----X--XXX   | CP1Ch3C4G5A6Cre7p1u  | -XXXXXXXXXXXXX----  | CP1Ch3C4G5A6Cre7p1u_Crepidodera_pluta_ame.idba.98            | -XXXXXXXXXXXXX--XXX  | CP1Ch3C4G5A6Cre7p1u_Crepidodera_pluta_ame.idba.98_MERGED            |
| -X-----X--XX-   | CP1Ch3C4G5A6Dib7occ  | XXXXXXXXXXXXX----   | CP1Ch3C4G5A6Dib7occ_Dibolia_occultans_Chryso.idba.132        | XXXXXXXXXXXXX--XX-   | CP1Ch3C4G5A6Dib7occ_Dibolia_occultans_Chryso.idba.132_MERGED        |
| -X-----         | CP1Ch3C4G5A6Dib7rug  | XXXXXXXXXXXXX----   | CP1Ch3C4G5A6Dib7rug_Dibolia_rugulosa_ame.idba.94             | XXXXXXXXXXXXX-----   | CP1Ch3C4G5A6Dib7rug_Dibolia_rugulosa_ame.idba.94_MERGED             |
| -X-----XXX      | CP1Ch3C4G5A6Ep7abe   | XXXXXXXXXXXXX----   | CP1Ch3C4G5A6Ep7abe_Epitrix_abeillei_CS.idba.39               | XXXXXXXXXXXXX-XXX    | CP1Ch3C4G5A6Ep7abe_Epitrix_abeillei_CS.idba.39_MERGED               |
| -XX-----XX-XXXX | CP1Ch3C4G5A6He7p1a   | XXXXXXXXXXXXX----   | CP1Ch3C4G5A6He7p1a_Hemipyxis_plagioderoides_ChrysoT.idba.5   | XXXXXXXXXXXXX-XXX    | CP1Ch3C4G5A6He7p1a_Hemipyxis_plagioderoides_ChrysoT.idba.5_MERGED   |
| -X-----X--XX-   | CP1Ch3C4G5A6Her7cic  | XXXXXXXXXX-----     | CP1Ch3C4G5A6Her7cic_Hermaeophaga_cicatrix_CS.idba.66         | XXXXXXXXXX--X--XX-   | CP1Ch3C4G5A6Her7cic_Hermaeophaga_cicatrix_CS.idba.66_MERGED         |
| -----XX--XXX    | CP1Ch3C4G5A6Lan7ram  | XXXXXXXXXXXXX----   | CP1Ch3C4G5A6Lan7ram_Lanka_ramakrishnai_ChrysoT.idba.39       | XXXXXXXXXXXXX-XXX    | CP1Ch3C4G5A6Lan7ram_Lanka_ramakrishnai_ChrysoT.idba.39_MERGED       |
| -X-----X--XX-   | CP1Ch3C4G5A6Lo7aen   | XXXXXXXXXXXXX----   | CP1Ch3C4G5A6Lo7aen_Longitarsus_aeneus_Chryso.idba.115        | XXXXXXXXXXXXX-XX-    | CP1Ch3C4G5A6Lo7aen_Longitarsus_aeneus_Chryso.idba.115_MERGED        |
| -XX-----X--XX-  | CP1Ch3C4G5A6Lo7atr   | XXXXXXXXXXXXX----   | CP1Ch3C4G5A6Lo7atr_Longitarsus_atricillus_Chryso.idba.40     | XXXXXXXXXXXXX-XX-    | CP1Ch3C4G5A6Lo7atr_Longitarsus_atricillus_Chryso.idba.40_MERGED     |
| -X-----X--XX-   | CP1Ch3C4G5A6Lo7cer   | XXXXXXXXXXXXX----   | CP1Ch3C4G5A6Lo7cer_Longitarsus_cerinthos_Chryso.idba.50      | XXXXXXXXXXXXX-XX-    | CP1Ch3C4G5A6Lo7cer_Longitarsus_cerinthos_Chryso.idba.50_MERGED      |
| -XX-----X--XX-  | CP1Ch3C4G5A6Lo7dor   | XXXXXXXXXXXXX----   | CP1Ch3C4G5A6Lo7dor_Longitarsus_dorsalis_Chryso.idba.108      | XXXXXXXXXXXXX-XX-    | CP1Ch3C4G5A6Lo7dor_Longitarsus_dorsalis_Chryso.idba.108_MERGED      |
| -XX-----XX-XXX  | CP1Ch3C4G5A6Lo7exs   | XXXXXXXXXXXXX----   | CP1Ch3C4G5A6Lo7exs_Longitarsus_exsoletus_Chryso.idba.102     | XXXXXXXXXXXXX-XXX    | CP1Ch3C4G5A6Lo7exs_Longitarsus_exsoletus_Chryso.idba.102_MERGED     |
| -X-----         | CP1Ch3C4G5A6Lo7ibe   | XXXXXXXXXXXXX----   | CP1Ch3C4G5A6Lo7ibe_Longitarsus_ibericus_Chryso.idba.67       | XXXXXXXXXXXXX-XX-    | CP1Ch3C4G5A6Lo7ibe_Longitarsus_ibericus_Chryso.idba.67_MERGED       |
| -XX-----X--XX-  | CP1Ch3C4G5A6Lo7lur   | XXXXXXXXXXXXX----   | CP1Ch3C4G5A6Lo7lur_Longitarsus_luridus_Chryso.idba.72        | XXXXXXXXXXXXX-XX-    | CP1Ch3C4G5A6Lo7lur_Longitarsus_luridus_Chryso.idba.72_MERGED        |
| -X-----X--XX-   | CP1Ch3C4G5A6Lo7me1   | XXXXXXXXXXXXX----   | CP1Ch3C4G5A6Lo7me1_Longitarsus_melanocephalus_Chryso.idba.26 | XXXXXXXXXXXXX-XX-    | CP1Ch3C4G5A6Lo7me1_Longitarsus_melanocephalus_Chryso.idba.26_MERGED |
| -X-----XX-XXX-  | CP1Ch3C4G5A6Lo7mem   | XXXXXXXXXXXXX----   | CP1Ch3C4G5A6Lo7mem_Longitarsus_membranaceus_Chryso.idba.45   | XXXXXXXXXXXXX-XXX    | CP1Ch3C4G5A6Lo7mem_Longitarsus_membranaceus_Chryso.idba.45_MERGED   |
| -X-----         | CP1Ch3C4G5A6Lo7nig   | XXXXXXXXXXXXX----   | CP1Ch3C4G5A6Lo7nig_Longitarsus_nigrofasciatus_Chryso.idba.89 | XXXXXXXXXXXXX-XX-    | CP1Ch3C4G5A6Lo7nig_Longitarsus_nigrofasciatus_Chryso.idba.89_MERGED |
| -XX-----X--XX-  | CP1Ch3C4G5A6Lo7ord   | XXXXXXXXXXXXX----   | CP1Ch3C4G5A6Lo7ord_Longitarsus_ordinatus_Chryso.idba.106     | XXXXXXXXXXXXX-XX-    | CP1Ch3C4G5A6Lo7ord_Longitarsus_ordinatus_Chryso.idba.106_MERGED     |
| -XX-----X--XX-  | CP1Ch3C4G5A6Lo7par   | XXXXXXXXXX-----     | CP1Ch3C4G5A6Lo7par_Longitarsus_parvulus_Chryso.idba.145      | XXXXXXXXXX--X--XX-   | CP1Ch3C4G5A6Lo7par_Longitarsus_parvulus_Chryso.idba.145_MERGED      |
| -X-----X--XX-   | CP1Ch3C4G5A6Lo7pra   | XXXXXXXXXXXXX----   | CP1Ch3C4G5A6Lo7pra_Longitarsus_pratensis_Chryso.idba.127     | XXXXXXXXXXXXX-XX-    | CP1Ch3C4G5A6Lo7pra_Longitarsus_pratensis_Chryso.idba.127_MERGED     |
| -X-----X--XX-   | CP1Ch3C4G5A6Lo7rut   | XXXXXXXXXXXXX----   | CP1Ch3C4G5A6Lo7rut_Longitarsus_rutilus_Chryso.idba.61        | XXXXXXXXXXXXX-XX-    | CP1Ch3C4G5A6Lo7rut_Longitarsus_rutilus_Chryso.idba.61_MERGED        |
| -XX-----X--XX-  | CP1Ch3C4G5A6Lo7tab   | XXXXXXXXXXXXX----   | CP1Ch3C4G5A6Lo7tab_Longitarsus_tabidus_Chryso.idba.86        | XXXXXXXXXXXXX-XX-    | CP1Ch3C4G5A6Lo7tab_Longitarsus_tabidus_Chryso.idba.86_MERGED        |
| -XX-----XX-XXX  | CP1Ch3C4G5A6Lup7xan  | XXXXXXXX-----       | CP1Ch3C4G5A6Lup7xan_Luperomorpha_xanthodera_ame.idba.160     | XXXXXXX--X--XXX      | CP1Ch3C4G5A6Lup7xan_Luperomorpha_xanthodera_ame.idba.160_MERGED     |
| -X-----X--XXX   | CP1Ch3C4G5A6Lyp7pub  | XXXXXXXXXXXXX----   | CP1Ch3C4G5A6Lyp7pub_Lypnea_pubipennis_CS.idba.34             | XXXXXXXXXXXXX-XXX    | CP1Ch3C4G5A6Lyp7pub_Lypnea_pubipennis_CS.idba.34_MERGED             |

|                  |                      |                  |                                                              |                      |                                                                     |
|------------------|----------------------|------------------|--------------------------------------------------------------|----------------------|---------------------------------------------------------------------|
| --X-----XX--XXX  | CP1Ch3C4G5A6Mac7sub  | XXXXXXXXXXXXXXXX | CP1Ch3C4G5A6Mac7sub_Macrohaltica_subplicata_ChrysoT.idba.16  | XXXXXXXXXXXXXXXX-XX  | CP1Ch3C4G5A6Mac7sub_Macrohaltica_subplicata_ChrysoT.idba.16_MERGED  |
| -XX-----X--XX-   | CP1Ch3C4G5A6Mant7chr | XXXXXXXXXXXXXXXX | CP1Ch3C4G5A6Mant7chr_Mantura_chrysanthem1_Chryso.idba.58     | XXXXXXXXXXXXXXXX-XX- | CP1Ch3C4G5A6Mant7chr_Mantura_chrysanthem1_Chryso.idba.58_MERGED     |
| -X-----X--XX-    | CP1Ch3C4G5A6Ne7bre   | XXXXXXXXXXXXXXXX | CP1Ch3C4G5A6Ne7bre_Neocrepidodera_brevicollis_Chryso.idba.35 | XXXXXXXXXXXXXXXX-XX- | CP1Ch3C4G5A6Ne7bre_Neocrepidodera_brevicollis_Chryso.idba.35_MERGED |
| -XX-----X--XX-   | CP1Ch3C4G5A6Ne7fer   | XXXXXXXXXXXXXXXX | CP1Ch3C4G5A6Ne7fer_Neocrepidodera_ferruginea_Chryso.idba.112 | XXXXXXXXXXXXXXXX-XX- | CP1Ch3C4G5A6Ne7fer_Neocrepidodera_ferruginea_Chryso.idba.112_MERGED |
| -XX-----X--XX-   | CP1Ch3C4G5A6Ne7tra   | XXXXXXXXXXXXXXXX | CP1Ch3C4G5A6Ne7tra_Neocrepidodera_transversa_Chryso.idba.16  | XXXXXXXXXXXXXXXX-XX- | CP1Ch3C4G5A6Ne7tra_Neocrepidodera_transversa_Chryso.idba.16_MERGED  |
| -XX-----X--XXX   | CP1Ch3C4G5A6Oe7cin   | XXXXXXXXXXXXXXXX | CP1Ch3C4G5A6Oe7cin_Oedionychus_cinctus_ChrysoT.idba.19       | XXXXXXXXXXXXXXXX-XXX | CP1Ch3C4G5A6Oe7cin_Oedionychus_cinctus_ChrysoT.idba.19_MERGED       |
| --X-----XX-      | CP1Ch3C4G5A6Ore7pun  | -XXXXXXXXXX-     | CP1Ch3C4G5A6Ore7pun_Orestia_punctipennis_CS.idba.63          | --XXXXXXXXXX----     | CP1Ch3C4G5A6Ore7pun_Orestia_punctipennis_CS.idba.63_MERGED          |
| -X-----XX-       | CP1Ch3C4G5A6Phi7vib  | XXXXXXXXXXXXXXXX | CP1Ch3C4G5A6Phi7vib_Philopona_vibex_ChrysoT.idba.38          | XXXXXXXXXXXXXXXX---- | CP1Ch3C4G5A6Phi7vib_Philopona_vibex_ChrysoT.idba.38_MERGED          |
| -XXX-----XX-     | CP1Ch3C4G5A6Phy7cru  | XXXXXXXXXXXXXXXX | CP1Ch3C4G5A6Phy7cru_Phyllotreta_cruciferae_Chryso.idba.105   | XXXXXXXXXXXXXXXX-XX- | CP1Ch3C4G5A6Phy7cru_Phyllotreta_cruciferae_Chryso.idba.105_MERGED   |
| -XX-----XX-      | CP1Ch3C4G5A6Phy7fou  | XXXXXXXXXXXXXXXX | CP1Ch3C4G5A6Phy7fou_Phyllotreta_foudrasi_Chryso.idba.113     | XXXXXXXXXXXXXXXX-XX- | CP1Ch3C4G5A6Phy7fou_Phyllotreta_foudrasi_Chryso.idba.113_MERGED     |
| -X-----XX-       | CP1Ch3C4G5A6Phy7hem  | XXXXXXXXXXXXXXXX | CP1Ch3C4G5A6Phy7hem_Phyllotreta_hemipoda_Chryso.idba.109     | XXXXXXXXXXXXXXXX-XX- | CP1Ch3C4G5A6Phy7hem_Phyllotreta_hemipoda_Chryso.idba.109_MERGED     |
| -XX-----XX-      | CP1Ch3C4G5A6Phy7nig  | XXXXXXXXXX-      | CP1Ch3C4G5A6Phy7nig_Phyllotreta_nigripes_ChrysoT.idba.54     | XXXXXXXXXX-          | CP1Ch3C4G5A6Phy7nig_Phyllotreta_nigripes_ChrysoT.idba.54_MERGED     |
| -XX-----XX-      | CP1Ch3C4G5A6Phy7tet  | XXXXXXXXXXXXXXXX | CP1Ch3C4G5A6Phy7tet_Phyllotreta_tetrastigma_Chryso.idba.80   | XXXXXXXXXXXXXXXX-XX- | CP1Ch3C4G5A6Phy7tet_Phyllotreta_tetrastigma_Chryso.idba.80_MERGED   |
| -XX-----XX-      | CP1Ch3C4G5A6Phy7und  | XXXXXXXXXXXXXXXX | CP1Ch3C4G5A6Phy7und_Phyllotreta_undulata_Chryso.idba.114     | XXXXXXXXXXXXXXXX-XX- | CP1Ch3C4G5A6Phy7und_Phyllotreta_undulata_Chryso.idba.114_MERGED     |
| -X-----XX-       | CP1Ch3C4G5A6Phy7var  | XXXXXXXXXXXXXXXX | CP1Ch3C4G5A6Phy7var_Phyllotreta_variipennis_Chryso.idba.119  | XXXXXXXXXXXXXXXX-XX- | CP1Ch3C4G5A6Phy7var_Phyllotreta_variipennis_Chryso.idba.119_MERGED  |
| --X-----XXX      | CP1Ch3C4G5A6Po7lut   | XXXXXXXXXXXXXXXX | CP1Ch3C4G5A6Po7lut_Podontia_lutea_ChrysoT.idba.3             | XXXXXXXXXXXXXXXX-XXX | CP1Ch3C4G5A6Po7lut_Podontia_lutea_ChrysoT.idba.3_MERGED             |
| -XX-----X--XX-   | CP1Ch3C4G5A6Pod7fus  | -XXXXXXXXXXXX-   | CP1Ch3C4G5A6Pod7fus_Podagricola_fuscipes_Chryso.idba.135     | -XXXXXXXXXXXX-XX-    | CP1Ch3C4G5A6Pod7fus_Podagricola_fuscipes_Chryso.idba.135_MERGED     |
| -XX-----X--XXX   | CP1Ch3C4G5A6Psy7chr  | XXXXXXXXXXXXXXXX | CP1Ch3C4G5A6Psy7chr_Psylliodes_chrysocephalus_Chryso.idba.76 | XXXXXXXXXXXXXXXX-XXX | CP1Ch3C4G5A6Psy7chr_Psylliodes_chrysocephalus_Chryso.idba.76_MERGED |
| -X-----X--XXX-   | CP1Ch3C4G5A6Psy7cup  | XXXXXXXXXXXXXXXX | CP1Ch3C4G5A6Psy7cup_Psylliodes_cupreatus_Chryso.idba.117     | XXXXXXXXXXXXXXXX-XX- | CP1Ch3C4G5A6Psy7cup_Psylliodes_cupreatus_Chryso.idba.117_MERGED     |
| -X-----X--XXX-   | CP1Ch3C4G5A6Psy7fus  | XXXXXXXXXXXXXXXX | CP1Ch3C4G5A6Psy7fus_Psylliodes_fusiformis_Chryso.idba.0      | XXXXXXXXXXXXXXXX-XXX | CP1Ch3C4G5A6Psy7fus_Psylliodes_fusiformis_Chryso.idba.0_MERGED      |
| -X-----X--XXX-   | CP1Ch3C4G5A6Psy7gou  | XXXXXXXXXXXXXXXX | CP1Ch3C4G5A6Psy7gou_Psylliodes_gougeleti_Chryso.idba.128     | XXXXXXXXXXXXXXXX-XXX | CP1Ch3C4G5A6Psy7gou_Psylliodes_gougeleti_Chryso.idba.128_MERGED     |
| -X-----X--XXX-   | CP1Ch3C4G5A6Psy7his  | XXXXXXXXXXXXXXXX | CP1Ch3C4G5A6Psy7his_Psylliodes_hispnus_Chryso.idba.1         | XXXXXXXXXXXXXXXX-XXX | CP1Ch3C4G5A6Psy7his_Psylliodes_hispnus_Chryso.idba.1_MERGED         |
| -X-----X--XX-    | CP1Ch3C4G5A6Psy7lae  | -XXXXXXXXXXXX-   | CP1Ch3C4G5A6Psy7lae_Psylliodes_laevicollis_Chryso.idba.129   | -XXXXXXXXXXXX-XX-    | CP1Ch3C4G5A6Psy7lae_Psylliodes_laevicollis_Chryso.idba.129_MERGED   |
| -XX-----X--XX-   | CP1Ch3C4G5A6Psy7thl  | XXXXXXXXXXXXXXXX | CP1Ch3C4G5A6Psy7thl_Psylliodes_thlasps_Chryso.idba.120       | XXXXXXXXXXXXXXXX-XX- | CP1Ch3C4G5A6Psy7thl_Psylliodes_thlasps_Chryso.idba.120_MERGED       |
| -X-----XXX       | CP1Ch3C4G5A6Si7ful   | XXXXXXXXXXXXXXXX | CP1Ch3C4G5A6Si7ful_Sinocrepis_fulva_ChrysoT.idba.14          | XXXXXXXXXXXXXXXX-XXX | CP1Ch3C4G5A6Si7ful_Sinocrepis_fulva_ChrysoT.idba.14_MERGED          |
| -XX-----X--XXX   | CP1Ch3C4G5A6Te7ker   | XXXXXXXXXXXXXXXX | CP1Ch3C4G5A6Te7ker_Tegyrius_keralaensis_ChrysoT.idba.32      | XXXXXXXXXXXXXXXX-XXX | CP1Ch3C4G5A6Te7ker_Tegyrius_keralaensis_ChrysoT.idba.32_MERGED      |
| -XX-----X--XX-   | CP1Ch3C4G5G6Gal7int  | XXXXXXXXXXXXXXXX | CP1Ch3C4G5G6Gal7int_Galeruca_interrupta_Chryso.idba.33       | XXXXXXXXXXXXXXXX-XX- | CP1Ch3C4G5G6Gal7int_Galeruca_interrupta_Chryso.idba.33_MERGED       |
| -X-----XX-       | CP1Ch3C4G5G6Gal7mac  | XXXXXXXXXXXXXXXX | CP1Ch3C4G5G6Gal7mac_Galeruca_macchoi_Chryso.idba.28          | XXXXXXXXXXXXXXXX-XX- | CP1Ch3C4G5G6Gal7mac_Galeruca_macchoi_Chryso.idba.28_MERGED          |
| -XX-----X--X---- | CP1Ch3C4G5G6Gal7nig  | XXXXXXXXXXXXXXXX | CP1Ch3C4G5G6Gal7nig_Galeruca_nigrolineata_ChrysoT.idba.33    | XXXXXXXXXXXXXXXX---- | CP1Ch3C4G5G6Gal7nig_Galeruca_nigrolineata_ChrysoT.idba.33_MERGED    |
| -X-----XXX       | CP1Ch3C4G5G6Is7dim   | XXXXXXXXXXXXXXXX | CP1Ch3C4G5G6Is7dim_Isshikia_dimidiaticornis_ChrysoT.idba.28  | XXXXXXXXXXXXXXXX-XXX | CP1Ch3C4G5G6Is7dim_Isshikia_dimidiaticornis_ChrysoT.idba.28_MERGED  |
| -X-----X--XXX    | CP1Ch3C4G5G6Pe7vig   | XXXXXXXXXX-      | CP1Ch3C4G5G6Pe7vig_Periclitena_vigorsi_ChrysoT.idba.66       | XXXXXXXXXX-XXX       | CP1Ch3C4G5G6Pe7vig_Periclitena_vigorsi_ChrysoT.idba.66_MERGED       |
| -XX-----XX-      | CP1Ch3C4G5G6Py7aen   | XXXXXXXXXXXXXXXX | CP1Ch3C4G5G6Py7aen_Pyrrhalta_aenescens_ChrysoT.idba.17       | XXXXXXXXXXXXXXXX---- | CP1Ch3C4G5G6Py7aen_Pyrrhalta_aenescens_ChrysoT.idba.17_MERGED       |
| -X-----XXX-XXX   | CP1Ch3C4G5G6Tr7vir   | XXXXXXXXXX-      | CP1Ch3C4G5G6Tr7vir_Trirhabda_virgata_ChrysoT.idba.57         | XXXXXXXXXX-XXX-XXX   | CP1Ch3C4G5G6Tr7vir_Trirhabda_virgata_ChrysoT.idba.57_MERGED         |
| -X-----X--XXX    | CP1Ch3C4G5L6Ag7mir   | XXXXXXXXXXXXXXXX | CP1Ch3C4G5L6Ag7mir_Agetocera_mirabilis_CS.idba.48            | XXXXXXXXXXXXXXXX-XXX | CP1Ch3C4G5L6Ag7mir_Agetocera_mirabilis_CS.idba.48_MERGED            |
| -XX-----XX-XXX   | CP1Ch3C4G5L6Ca7cir   | XXXXXXXXXX-      | CP1Ch3C4G5L6Ca7cir_Calomacrus_circumfusus_Chryso.idba.139    | XXXXXXXXXX-XX-XXX    | CP1Ch3C4G5L6Ca7cir_Calomacrus_circumfusus_Chryso.idba.139_MERGED    |
| -X-----XX-XXX    | CP1Ch3C4G5L6Ca7pin   | XXXXXXXXXXXX-    | CP1Ch3C4G5L6Ca7pin_Calomacrus_pinicola_amie.idba.64          | XXXXXXXXXXXX----     | CP1Ch3C4G5L6Ca7pin_Calomacrus_pinicola_amie.idba.64_MERGED          |
| -XX-----XX-      | CP1Ch3C4G5L6Ca7sut   | XXXXXXXXXXXXXXXX | CP1Ch3C4G5L6Ca7sut_Calomacrus_suturalis_Chryso.idba.22       | XXXXXXXXXXXXXXXX-XX- | CP1Ch3C4G5L6Ca7sut_Calomacrus_suturalis_Chryso.idba.22_MERGED       |
| XXXXXXXXXXXXXXXX | CP1Ch3C4G5L6Dia7bar  | XXXXXXXXXXXXXXXX | CP1Ch3C4G5L6Dia7bar_Diabrotica_barberi_NC_022935             | XXXXXXXXXXXXXXXX-XXX | CP1Ch3C4G5L6Dia7bar_Diabrotica_barberi_NC_022935_MERGED             |
| XXXXXXXXXXXXXXXX | CP1Ch3C4G5L6Dia7vir  | XXXXXXXXXXXXXXXX | CP1Ch3C4G5L6Dia7vir_Diabrotica_virgifera_KF658070            | XXXXXXXXXXXXXXXX---- | CP1Ch3C4G5L6Dia7vir_Diabrotica_virgifera_KF658070_MERGED            |
| -X-----XX-XXX    | CP1Ch3C4G5L6Ex7lus   | XXXXXXXXXXXXXXXX | CP1Ch3C4G5L6Ex7lus_Exosoma_lusitanicum_Chryso.idba.116       | XXXXXXXXXXXXXXXX-XXX | CP1Ch3C4G5L6Ex7lus_Exosoma_lusitanicum_Chryso.idba.116_MERGED       |
| -XX-----XX-XXX   | CP1Ch3C4G5L6Ho7uni   | XXXXXXXXXXXX-    | CP1Ch3C4G5L6Ho7uni_Hoplasoma_unicolor_ChrysoT.idba.50        | XXXXXXXXXXXX-XXX     | CP1Ch3C4G5L6Ho7uni_Hoplasoma_unicolor_ChrysoT.idba.50_MERGED        |
| -X-----X--XXX    | CP1Ch3C4G5L6Hop7sub  | XXXXXXXXXXXXXXXX | CP1Ch3C4G5L6Hop7sub_Hoplosaenidea_subcostata_ChrysoT.idba.41 | XXXXXXXXXXXXXXXX-XXX | CP1Ch3C4G5L6Hop7sub_Hoplosaenidea_subcostata_ChrysoT.idba.41_MERGED |
| -X-----XX-       | CP1Ch3C4G5L6Lep7ery  | XXXXXXXXXXXXXXXX | CP1Ch3C4G5L6Lep7ery_Leptomoma_erythrocephala_Chryso.idba.46  | XXXXXXXXXXXXXXXX-XX- | CP1Ch3C4G5L6Lep7ery_Leptomoma_erythrocephala_Chryso.idba.46_MERGED  |
| -XX-----X--XX-   | CP1Ch3C4G5L6Ph7qua   | XXXXXXXXXXXX-    | CP1Ch3C4G5L6Ph7qua_Phyllotreta_quadrimaculata_amie.idba.53   | XXXXXXXXXXXX-XXX     | CP1Ch3C4G5L6Ph7qua_Phyllotreta_quadrimaculata_amie.idba.53_MERGED   |
| -X-----XX-       | CP1Ch3C4G5L6St7nip   | XXXXXXXXXXXXXXXX | CP1Ch3C4G5L6St7nip_Stenoluperus_nipponensis_ChrysoT.idba.29  | XXXXXXXXXXXXXXXX---- | CP1Ch3C4G5L6St7nip_Stenoluperus_nipponensis_ChrysoT.idba.29_MERGED  |
| -X--X--X--       | CP1Ch3C4G5O60i7mac   | XXXXXXXXXXXXXXXX | CP1Ch3C4G5O60i7mac_Oides_maculatus_ChrysoT.idba.45           | XXXXXXXXXXXXXXXX---- | CP1Ch3C4G5O60i7mac_Oides_maculatus_ChrysoT.idba.45_MERGED           |
| -X-----X--XXX    | CP1Ch3C4G5Op7sca     | XXXXXXXXXX-      | CP1Ch3C4G5Op7sca_Ophrida_scapoides_CS.idba.69                | XXXXXXXXXX-XXX       | CP1Ch3C4G5Op7sca_Ophrida_scapoides_CS.idba.69_MERGED                |
| -X-----X--XXX    | CP1Ch3C4G5Par7fla    | XXXXXXXXXXXXXXXX | CP1Ch3C4G5Par7fla_Paragetocera_favipes_ChrysoT.idba.24       | XXXXXXXXXXXXXXXX-XXX | CP1Ch3C4G5Par7fla_Paragetocera_favipes_ChrysoT.idba.24_MERGED       |
| -XX-----X--XXXX- | CP1Ch3C4G5S6Age7aln  | XXXXXXXXXXXX-    | CP1Ch3C4G5S6Age7aln_Agelastica_alni_CS.idba.57               | XXXXXXXXXXXX-X-XXXX- | CP1Ch3C4G5S6Age7aln_Agelastica_alni_CS.idba.57_MERGED               |
| -XX-----XX-      | CP1Ch3C4G5S6Ar7chi   | XXXXXXXXXXXXXXXX | CP1Ch3C4G5S6Ar7chi_Arthrotus_chinensis_CS.idba.16            | XXXXXXXXXXXXXXXX-XXX | CP1Ch3C4G5S6Ar7chi_Arthrotus_chinensis_CS.idba.16_MERGED            |
| -XX-----XXXXXX   | CP1Ch3C4G5S6Se7hal   | XXXXXXXXXXXXXXXX | CP1Ch3C4G5S6Se7hal_Sermylassa_halensis_ChrysoT.idba.11       | XXXXXXXXXXXXXXXX-XXX | CP1Ch3C4G5S6Se7hal_Sermylassa_halensis_ChrysoT.idba.11_MERGED       |
| -X-----X--XXX    | CP1Ch3C4G5S17sub     | XXXXXXXXXXXXXXXX | CP1Ch3C4G5S17sub_Sinoluperus_subcostatus_ChrysoT.idba.44     | XXXXXXXXXXXXXXXX-XXX | CP1Ch3C4G5S17sub_Sinoluperus_subcostatus_ChrysoT.idba.44_MERGED     |
| -XX-----X--XX-   | CP1Ch3C4G5S7rub      | XXXXXXXXXXXXXXXX | CP1Ch3C4G5S7rub_Sphaeroderma_rubidum_Chryso.idba.27          | XXXXXXXXXXXXXXXX-XX- | CP1Ch3C4G5S7rub_Sphaeroderma_rubidum_Chryso.idba.27_MERGED          |
| -XX-----XXXXXX   | CP1Ch3C4P17ser       | XXXXXXXXXXXXXXXX | CP1Ch3C4P17ser_Plateumaris_sericea_Chryso.idba.118           | XXXXXXXXXXXXXXXX-XXX | CP1Ch3C4P17ser_Plateumaris_sericea_Chryso.idba.118_MERGED           |
| -X-----XX-XXX    | CP1Ch3C4S5Sp7sum     | -XXXXXXXXXXXX-   | CP1Ch3C4S5Sp7sum_Spilopyra_sumptuosa_JX220997                | -XXXXXXXXXXXX-XXX    | CP1Ch3C4S5Sp7sum_Spilopyra_sumptuosa_JX220997_MERGED                |

|                 |                       |             |                                                                      |               |                                                                             |
|-----------------|-----------------------|-------------|----------------------------------------------------------------------|---------------|-----------------------------------------------------------------------------|
| -X-----         | CP1Ch3Ce4C5Ca6Py7san  | XXXXXXXXXX  | CP1Ch3Ce4C5Ca6Py7san_Pyrrhidium_sanguineum_amei.idba.43              | XXXXXXXXXX    | CP1Ch3Ce4C5Ca6Py7san_Pyrrhidium_sanguineum_amei.idba.43_MERGED              |
| XXXXXXXXXX-XXXX | CP1Ch3Ce4C5Ce6Ma7rad  | XXXXXXXXXX  | CP1Ch3Ce4C5Ce6Ma7rad_Massicus_raddei_NC_023937                       | XXXXXXXXXX    | CP1Ch3Ce4C5Ce6Ma7rad_Massicus_raddei_NC_023937_MERGED                       |
| -X-----         | CP1Ch3Ce4L5L6Cort7hum | XXXXXXXXXX  | CP1Ch3Ce4L5L6Cort7hum_Cortodera_humeralis_amei.idba.52               | XXXXXXXXXX    | CP1Ch3Ce4L5L6Cort7hum_Cortodera_humeralis_amei.idba.52_MERGED               |
| -XX-----        | CP1Ch3Ce4L5L6St7nig   | XXXXXXXXXX  | CP1Ch3Ce4L5L6St7nig_Stenurella_nigra_amei.idba.31                    | XXXXXXXXXX    | CP1Ch3Ce4L5L6St7nig_Stenurella_nigra_amei.idba.31_MERGED                    |
| -X-----         | CP1Ch3Ce4L5L6St7sep   | XXXXXXXXXX  | CP1Ch3Ce4L5L6St7sep_Stenurella_septempunctata_amei.idba.16           | XXXXXXXXXX    | CP1Ch3Ce4L5L6St7sep_Stenurella_septempunctata_amei.idba.16_MERGED           |
| -X-----         | CP1Ch3Ce4L5R6Br7int   | XXXXXXXXXX  | CP1Ch3Ce4L5R6Br7int_Brachyta_interrogationis_amei.idba.3             | XXXXXXXXXX    | CP1Ch3Ce4L5R6Br7int_Brachyta_interrogationis_amei.idba.3_MERGED             |
| -XX-----        | CP1Ch3Ce4L5R6Rh7mor   | -XXXXXXXXXX | CP1Ch3Ce4L5R6Rh7mor_Rhagium_mordax_JX412743                          | -XXXXXXXXXX   | CP1Ch3Ce4L5R6Rh7mor_Rhagium_mordax_JX412743_MERGED                          |
| XXXXXXXXXX      | CP1Ch3Ce4La5Ag6Ps7hil | XXXXXXXXXX  | CP1Ch3Ce4La5Ag6Ps7hil_Psacotha_hilaris_NC_013070                     | XXXXXXXXXX    | CP1Ch3Ce4La5Ag6Ps7hil_Psacotha_hilaris_NC_013070_MERGED                     |
| XXXXXXXXXX      | CP1Ch3Ce4La5B6Ba7lin  | XXXXXXXXXX  | CP1Ch3Ce4La5B6Ba7lin_Batocera_lineolata_NC_022671                    | XXXXXXXXXX    | CP1Ch3Ce4La5B6Ba7lin_Batocera_lineolata_NC_022671_MERGED                    |
| XXXXXXXXXX      | CP1Ch3Ce4La5L6An7gla  | XXXXXXXXXX  | CP1Ch3Ce4La5L6An7gla_Anoplophora_glabripennis_NC_008221              | XXXXXXXXXX    | CP1Ch3Ce4La5L6An7gla_Anoplophora_glabripennis_NC_008221_MERGED              |
| XXXXXXXXXX-X-   | CP1Ch3Ce4La5Mo6Ma7alt | XXXXXXXXXX  | CP1Ch3Ce4La5Mo6Ma7alt_Monochamus_alternatus_NC_024652                | XXXXXXXXXX-X- | CP1Ch3Ce4La5Mo6Ma7alt_Monochamus_alternatus_NC_024652_MERGED                |
| -XX-----        | CP1Ch3Ce4N5N6Ne7u1m   | -XXXXXXXXXX | CP1Ch3Ce4N5N6Ne7u1m_Necydalis_ulmi_JX220989                          | -XXXXXXXXXX   | CP1Ch3Ce4N5N6Ne7u1m_Necydalis_ulmi_JX220989_MERGED                          |
| -X-----         | CP1Ch3040r7cer        | XXXXXXXXXX  | CP1Ch3040r7cer_Orsodacne_cerasi_amei.idba.18                         | XXXXXXXXXX    | CP1Ch3040r7cer_Orsodacne_cerasi_amei.idba.18_MERGED                         |
| -X-----         | CP1Ch3040r7lin        | -XXXXXXXXXX | CP1Ch3040r7lin_Orsodacne_lineola_JX220994                            | -XXXXXXXXXX   | CP1Ch3040r7lin_Orsodacne_lineola_JX220994_MERGED                            |
| -XX-----        | CP1Cu3B4By7och        | XXXXXXXXXX  | CP1Cu3B4By7och_Byturus_ochraceus_677381_idba_contig_12               | XXXXXXXXXX    | CP1Cu3B4By7och_Byturus_ochraceus_677381_idba_contig_12_MERGED               |
| -X-----         | CP1Cu3Bot4An7duo      | -XXXXXXXXXX | CP1Cu3Bot4An7duo_Anommatus_duodecimstriatus_Soil.idba.105            | -XXXXXXXXXX   | CP1Cu3Bot4An7duo_Anommatus_duodecimstriatus_Soil.idba.105_MERGED            |
| XXXXXXXXXX      | CP1Cu3Bot4Da7hel      | XXXXXXXXXX  | CP1Cu3Bot4Da7hel_Dastarcus_helophoroides_NC_024271                   | XXXXXXXXXX    | CP1Cu3Bot4Da7hel_Dastarcus_helophoroides_NC_024271_MERGED                   |
| -XX-----        | CP1Cu3Bot4Te7cyl      | -XXXXXXXXXX | CP1Cu3Bot4Te7cyl_Teredus_cylindricus_amei.idba.176                   | -XXXXXXXXXX   | CP1Cu3Bot4Te7cyl_Teredus_cylindricus_amei.idba.176_MERGED                   |
| -XXX-----       | CP1Cu3C4C5Ad7dec      | -XXXXXXXXXX | CP1Cu3C4C5Ad7dec_Adalia_decempunctata_BIUK.idba.56                   | -XXXXXXXXXX   | CP1Cu3C4C5Ad7dec_Adalia_decempunctata_BIUK.idba.56_MERGED                   |
| -XX-----        | CP1Cu3C4C5An7nov      | XXXXXXXXXX  | CP1Cu3C4C5An7nov_Anisosticta_novemdecimpunctata_2VGB.idba.9          | XXXXXXXXXX    | CP1Cu3C4C5An7nov_Anisosticta_novemdecimpunctata_2VGB.idba.9_MERGED          |
| -X-----         | CP1Cu3C4C5Ana7oce     | XXXXXXXXXX  | CP1Cu3C4C5Ana7oce_Anatis_ocellata_833044_idba_contig_22              | XXXXXXXXXX    | CP1Cu3C4C5Ana7oce_Anatis_ocellata_833044_idba_contig_22_MERGED              |
| -X-----         | CP1Cu3C4C5Ca7dec      | XXXXXXXXXX  | CP1Cu3C4C5Ca7dec_Calvia_decemguttata_amei.idba.50                    | XXXXXXXXXX    | CP1Cu3C4C5Ca7dec_Calvia_decemguttata_amei.idba.50_MERGED                    |
| -XXXXXXXXXX     | CP1Cu3C4C5Ch7sex      | XXXXXXXXXX  | CP1Cu3C4C5Ch7sex_Cheilomenes_sexmaculata_KM244706                    | XXXXXXXXXX    | CP1Cu3C4C5Ch7sex_Cheilomenes_sexmaculata_KM244706_MERGED                    |
| -X-----         | CP1Cu3C4C5Co7mag      | XXXXXXXXXX  | CP1Cu3C4C5Co7mag_Coccinella_magnifica_amei.idba.0                    | XXXXXXXXXX    | CP1Cu3C4C5Co7mag_Coccinella_magnifica_amei.idba.0_MERGED                    |
| -XX-----        | CP1Cu3C4C5Ha7qua      | XXXXXXXXXX  | CP1Cu3C4C5Ha7qua_Harmonia_quadripunctata_amei.idba.4                 | XXXXXXXXXX    | CP1Cu3C4C5Ha7qua_Harmonia_quadripunctata_amei.idba.4_MERGED                 |
| -XX-----        | CP1Cu3C4C5Hal7sed     | -XXXXXXXXXX | CP1Cu3C4C5Hal7sed_Halyzia_sedecimguttata_Staph.idba.68               | -XXXXXXXXXX   | CP1Cu3C4C5Hal7sed_Halyzia_sedecimguttata_Staph.idba.68_MERGED               |
| -X-----         | CP1Cu3C4C5Hi7und      | XXXXXXXXXX  | CP1Cu3C4C5Hi7und_Hippodamia_undecimnotata_amei.idba.26               | XXXXXXXXXX    | CP1Cu3C4C5Hi7und_Hippodamia_undecimnotata_amei.idba.26_MERGED               |
| -XXXXXXXXXX     | CP1Cu3C4C5Pr7jap      | XXXXXXXXXX  | CP1Cu3C4C5Pr7jap_Propylea_japonica_KM244660                          | XXXXXXXXXX    | CP1Cu3C4C5Pr7jap_Propylea_japonica_KM244660_MERGED                          |
| -XX-----        | CP1Cu3C4Co5Co7ruf     | -XXXXXXXXXX | CP1Cu3C4Co5Co7ruf_Coccidula_rufa_JX412767                            | -XXXXXXXXXX   | CP1Cu3C4Co5Co7ruf_Coccidula_rufa_JX412767_MERGED                            |
| XXXXXXXXXX      | CP1Cu3C4E5E6He7pusi   | XXXXXXXXXX  | CP1Cu3C4E5E6He7pusi_Henosepilachna_pusillanima_NC_023469             | XXXXXXXXXX    | CP1Cu3C4E5E6He7pusi_Henosepilachna_pusillanima_NC_023469_MERGED             |
| -XX-----        | CP1Cu3C4E5E6Su7vig    | XXXXXXXXXX  | CP1Cu3C4E5E6Su7vig_Suboccinella_vigintiquatuorpunctata_Staph.idba.64 | XXXXXXXXXX    | CP1Cu3C4E5E6Su7vig_Suboccinella_vigintiquatuorpunctata_Staph.idba.64_MERGED |
| -XX-----        | CP1Cu3Ce4Ce7his       | XXXXX-X-XXX | CP1Cu3Ce4Ce7his_Cerylon_histeroides_HQ232821                         | XXXXX-X-XXX   | CP1Cu3Ce4Ce7his_Cerylon_histeroides_HQ232821_MERGED                         |
| -XX-----        | CP1Cu3Cr4Cr7pil       | XXXXXXXXXX  | CP1Cu3Cr4Cr7pil_Cryptophagus_pilosus_Soil.idba.15                    | XXXXXXXXXX    | CP1Cu3Cr4Cr7pil_Cryptophagus_pilosus_Soil.idba.15_MERGED                    |
| -X-----         | CP1Cu3Cr4Mi7vil       | XXXXXXXXXX  | CP1Cu3Cr4Mi7vil_Micrambe_villosus_amei.idba.34                       | XXXXXXXXXX    | CP1Cu3Cr4Mi7vil_Micrambe_villosus_amei.idba.34_MERGED                       |
| XXXXXXXXXX      | CP1Cu3Cu4Cu7cla       | XXXXXXXXXX  | CP1Cu3Cu4Cu7cla_Cucujus_clavipes_NC_018350                           | XXXXXXXXXX    | CP1Cu3Cu4Cu7cla_Cucujus_clavipes_NC_018350_MERGED                           |
| -X-----         | CP1Cu3Cu4Cu7hae       | XXXXXXXXXX  | CP1Cu3Cu4Cu7hae_Cucujus_haematodes_amei.idba.42                      | XXXXXXXXXX    | CP1Cu3Cu4Cu7hae_Cucujus_haematodes_amei.idba.42_MERGED                      |
| -XX-----        | CP1Cu3E4Tr7bip        | -XXXX-XXXX  | CP1Cu3E4Tr7bip_Tritoma_bipustulata_HQ232822                          | -XXXX-XXXX    | CP1Cu3E4Tr7bip_Tritoma_bipustulata_HQ232822_MERGED                          |
| -XX-----        | CP1Cu3En4End7coc      | -XXXXXXXXXX | CP1Cu3En4End7coc_Endomychus_coccineus_JX313667                       | -XXXXXXXXXX   | CP1Cu3En4End7coc_Endomychus_coccineus_JX313667_MERGED                       |
| -X-----         | CP1Cu3K4Bra7ves       | -XXXXXXXXXX | CP1Cu3K4Bra7ves_Brachypterolus_vestitus_amei.idba.107                | -XXXXXXXXXX   | CP1Cu3K4Bra7ves_Brachypterolus_vestitus_amei.idba.107_MERGED                |
| -XX-----        | CP1Cu3K4Ka7ped        | -XXXX-XXXX  | CP1Cu3K4Ka7ped_Kateretes_pedicularius_amei.idba.175                  | -XX-----      | CP1Cu3K4Ka7ped_Kateretes_pedicularius_amei.idba.175_MERGED                  |
| -XXX-----       | CP1Cu3Lat4Ca7nod      | XXXXXXXXXX  | CP1Cu3Lat4Ca7nod_Cartodere_nodifer_BIUK.idba.51                      | XXXXXXXXXX    | CP1Cu3Lat4Ca7nod_Cartodere_nodifer_BIUK.idba.51_MERGED                      |
| -XX-----        | CP1Cu3Lat4Co7gib      | XXXXXXXXXX  | CP1Cu3Lat4Co7gib_Corticinara_gibbosa_BIUK.idba.27                    | XXXXXXXXXX    | CP1Cu3Lat4Co7gib_Corticinara_gibbosa_BIUK.idba.27_MERGED                    |
| -XX-----        | CP1Cu3Lat4Co7sim      | XXXXXXXXXX  | CP1Cu3Lat4Co7sim_Corticarina_similata_BIUK.idba.1a                   | XXXXXXXXXX    | CP1Cu3Lat4Co7sim_Corticarina_similata_BIUK.idba.1a_MERGED                   |
| -X-----         | CP1Cu3Lat4En7bre      | -XXXXXXXXXX | CP1Cu3Lat4En7bre_Enicmus_brevicornis_JX313681                        | -XXXXXXXXXX   | CP1Cu3Lat4En7bre_Enicmus_brevicornis_JX313681_MERGED                        |
| -X-----         | CP1Cu3M4M5Mo7qua      | XXXXXXXXXX  | CP1Cu3M4M5Mo7qua_Monotoma_quadricollis_676892_idba_contig_27-86      | XXXXXXXXXX    | CP1Cu3M4M5Mo7qua_Monotoma_quadricollis_676892_idba_contig_27-86_MERGED      |
| -X-----         | CP1Cu3M4R5Rh7aen      | XXXXXXXXXX  | CP1Cu3M4R5Rh7aen_Rhizophagus_aeneus_amei.idba.45                     | XXXXXXXXXX    | CP1Cu3M4R5Rh7aen_Rhizophagus_aeneus_amei.idba.45_MERGED                     |
| -XX-----        | CP1Cu3M4R5Rh7dis      | -XXXX-XXXX  | CP1Cu3M4R5Rh7dis_Rhizophagus_dispr_676912_idba_contig_113            | -XXXX-XXXX    | CP1Cu3M4R5Rh7dis_Rhizophagus_dispr_676912_idba_contig_113_MERGED            |
| -XX-----        | CP1Cu3N4C5Ep7me1      | XXXXXXXXXX  | CP1Cu3N4C5Ep7me1_Epuraea_melanocephala_BIUK.idba.43                  | XXXXXXXXXX    | CP1Cu3N4C5Ep7me1_Epuraea_melanocephala_BIUK.idba.43_MERGED                  |
| -XX-----        | CP1Cu3N4Cr5G17hor     | -XXXXXXXXXX | CP1Cu3N4Cr5G17hor_Glischrochilus_hortensis_JX412778                  | -XXXXXXXXXX   | CP1Cu3N4Cr5G17hor_Glischrochilus_hortensis_JX412778_MERGED                  |
| -XX-----        | CP1Cu3N4N5Po7adu      | XXXXXXXXXX  | CP1Cu3N4N5Po7adu_Pocadius_ajustus_BIUK.idba.12                       | XXXXXXXXXX    | CP1Cu3N4N5Po7adu_Pocadius_ajustus_BIUK.idba.12_MERGED                       |
| -XX-----        | CP1Cu3P4Er7syl        | XXX-----    | CP1Cu3P4Er7syl_Ericmodes_sylvaticus_697044_idba_contig_61            | XXX-----      | CP1Cu3P4Er7syl_Ericmodes_sylvaticus_697044_idba_contig_61_MERGED            |
| XXXXXXXXXX      | CP1Cu3Ph4Pr7obs       | XXXXXXXXXX  | CP1Cu3Ph4Pr7obs_Priasilpha_obscura_NC_011326                         | XXXXXXXXXX    | CP1Cu3Ph4Pr7obs_Priasilpha_obscura_NC_011326_MERGED                         |
| -XX-----        | CP1Cu3S4As7orb        | XXXXXXXXXX  | CP1Cu3S4As7orb_Aspidiphorus_orbiculatus_Staph.idba.13                | XXXXXXXXXX    | CP1Cu3S4As7orb_Aspidiphorus_orbiculatus_Staph.idba.13_MERGED                |
| -XX-----        | CP1Cu3S4Sp7dub        | -XXXXXXXXXX | CP1Cu3S4Sp7dub_Sphindus_dubius_JX412803                              | -XXXXXXXXXX   | CP1Cu3S4Sp7dub_Sphindus_dubius_JX412803_MERGED                              |
| -X-----         | CP1Cu3S14S50r7sur     | XXXXXXXXXX  | CP1Cu3S14S50r7sur_Oryzaephilus_surinamensis_Soil.idba.57             | XXXXXXXXXX    | CP1Cu3S14S50r7sur_Oryzaephilus_surinamensis_Soil.idba.57_MERGED             |

|                   |                         |                       |                                                             |                        |                                                                    |
|-------------------|-------------------------|-----------------------|-------------------------------------------------------------|------------------------|--------------------------------------------------------------------|
| -XX-----XX-XXX    | CP1Cu3S14S5S17uni       | -----XXXX-XXXX        | CP1Cu3S14S5S17uni_Silvanus_unidentatus_JX313687             | -XX---XXXXXX-XX        | CP1Cu3S14S5S17uni_Silvanus_unidentatus_JX313687_MERGED             |
| -XX-----X---XX-   | CP1Cur3A4A5P6P17alb     | -XXXXXXXXXX-XXXX      | CP1Cur3A4A5P6P17alb_Platystomos_albinus_JN163968            | -XXXXXXXXXX-XX-        | CP1Cur3A4A5P6P17alb_Platystomos_albinus_JN163968_MERGED            |
| -XX-----XX-XX-    | CP1Cur3AT4A5AT7nit      | XXXXXXXXXXXX-XXXX     | CP1Cur3AT4A5AT7nit_AtteLABUS_nitens_ameie_idba.73           | XXXXXXXXXXXX-XX-       | CP1Cur3AT4A5AT7nit_AtteLABUS_nitens_ameie_idba.73_MERGED           |
| -X-----X-----     | CP1Cur3AT4A5P7cor       | -XXXXXXXXXX-XXXX      | CP1Cur3AT4A5P7cor_Apoderus_coryli_JN163966                  | -XXXXXXXXXX-XXXX       | CP1Cur3AT4A5P7cor_Apoderus_coryli_JN163966_MERGED                  |
| -X-----XX-----    | CP1Cur3AT4R5B7pop       | --XXXXXXXXXX-XXXX     | CP1Cur3AT4R5B7pop_Byctiscus_populi_NC_018760                | -X-XXXXXXXXXX-XXXX     | CP1Cur3AT4R5B7pop_Byctiscus_populi_NC_018760_MERGED                |
| -XX-----XX-----   | CP1Cur3AT4R5De7bet      | --XXXXXXXXXX-XXXX     | CP1Cur3AT4R5De7bet_Deporaus_betulae_JN163945                | -XXXXXXXXXX-XX-        | CP1Cur3AT4R5De7bet_Deporaus_betulae_JN163945_MERGED                |
| -X-----XX-----    | CP1Cur3AT4R5De7tri      | XXXXXXXXXX-XXXX       | CP1Cur3AT4R5De7tri_Deporaus_tristis_ameie_idba.109          | XXXXXXXXXX-XXXX        | CP1Cur3AT4R5De7tri_Deporaus_tristis_ameie_idba.109_MERGED          |
| -XX-----X---XX-   | CP1Cur3Br4A5Be7sim      | XXXXXXXXXXXXXXXX-XXXX | CP1Cur3Br4A5Be7sim_Betulapion_simile_BIUK_idba.36           | XXXXXXXXXXXXXXXX-XX-   | CP1Cur3Br4A5Be7sim_Betulapion_simile_BIUK_idba.36_MERGED           |
| -X-----XX-----    | CP1Cur3Br4A5Pr7int      | XXXXXXXXXX-XXXX       | CP1Cur3Br4A5Pr7int_Protapion_interjectum_Soil_idba.118      | XXXXXXXXXX-XXXX        | CP1Cur3Br4A5Pr7int_Protapion_interjectum_Soil_idba.118_MERGED      |
| -XX-----XX-----   | CP1Cur3Br4A5Pr7tri      | XXXXXXXXXXXXXXXX-XXXX | CP1Cur3Br4A5Pr7tri_Protapion_trifolii_Soil_idba.58          | XXXXXXXXXXXXXXXX-XXXX  | CP1Cur3Br4A5Pr7tri_Protapion_trifolii_Soil_idba.58_MERGED          |
| -X-----XX-----    | CP1Cur3Br4A5Rh7lon      | --XXXXXXXXXX-XXXX     | CP1Cur3Br4A5Rh7lon_Rhopalation_longirostre_JN163967         | -XXXXXXXXXX-XXXX       | CP1Cur3Br4A5Rh7lon_Rhopalation_longirostre_JN163967_MERGED         |
| -XX-----X---XX-   | CP1Cur3Br4N5Na7mar      | -----XXXXXXXXXX-XXXX  | CP1Cur3Br4N5Na7mar_Nanophyes_marmoratus_Curc_idba.93        | -XX-XXXXXXXXXX-XX-     | CP1Cur3Br4N5Na7mar_Nanophyes_marmoratus_Curc_idba.93_MERGED        |
| -----XX-----      | CP1Cur3Bra4B5Br7mur     | --XXXXXXXXXX-XXXX     | CP1Cur3Bra4B5Br7mur_Brachycerus_muricatus_JN163970          | --XXXXXXXXXX-XX-       | CP1Cur3Bra4B5Br7mur_Brachycerus_muricatus_JN163970_MERGED          |
| -X-----XX-----    | CP1Cur3Bra4B5Ha7DDM2009 | -----XXXXXXXXXX-XXXX  | CP1Cur3Bra4B5Ha7DDM2009_Haplonyx_spDDM-2009_Curc_idba.98    | -X-----XXXXXXXXXX-XXXX | CP1Cur3Bra4B5Ha7DDM2009_Haplonyx_spDDM-2009_Curc_idba.98_MERGED    |
| -X-----XX-----    | CP1Cur3Bra4E5D07tor     | XXXXXXXXXX-XXXX       | CP1Cur3Bra4E5D07tor_Dorytomus_tortrix_ameie_idba.139        | XXXXXXXXXX-XXXX        | CP1Cur3Bra4E5D07tor_Dorytomus_tortrix_ameie_idba.139_MERGED        |
| -XX-----X---X-    | CP1Cur3C4C5A6An7pom     | --XXXXXXXXXX-XXXX     | CP1Cur3C4C5A6An7pom_Anthonomus_pomorum_JN163951             | -XXXXXXXXXX-XX-        | CP1Cur3C4C5A6An7pom_Anthonomus_pomorum_JN163951_MERGED             |
| -X-----X-----     | CP1Cur3C4C5A6Br7ke1     | XXXXXXXXXXXX-XXXX     | CP1Cur3C4C5A6Br7ke1_Bradybatus_kellneri_ameie_idba.54       | XXXXXXXXXXXX-XXXX      | CP1Cur3C4C5A6Br7ke1_Bradybatus_kellneri_ameie_idba.54_MERGED       |
| -XX-----X---X-    | CP1Cur3C4C5C6Cu7ele     | XXXXXXXXXXXX-XXXX     | CP1Cur3C4C5C6Cu7ele_Curculio_elephas_ameie_idba.5           | XXXXXXXXXXXX-XX-       | CP1Cur3C4C5C6Cu7ele_Curculio_elephas_ameie_idba.5_MERGED           |
| -XX-----X-X-XXX-  | CP1Cur3C4C5C6Cu7gla     | -----XXXXXXXXXX-XXXX  | CP1Cur3C4C5C6Cu7gla_Curculio_glandium_BIUK_idba.52          | -XX-XXXXXXXXXXXX-XX-   | CP1Cur3C4C5C6Cu7gla_Curculio_glandium_BIUK_idba.52_MERGED          |
| -----X-X-XX-      | CP1Cur3C4C5E6An7tar     | XXXXXXXXXXXXXXXX-XXXX | CP1Cur3C4C5E6An7tar_Ancyttalia_tarsalis_Curc_idba.45        | XXXXXXXXXXXXXXXX-XX    | CP1Cur3C4C5E6An7tar_Ancyttalia_tarsalis_Curc_idba.45_MERGED        |
| -X-X-----XX-----  | CP1Cur3C4C5M6Me7jan     | --XXXXXX-XXXX         | CP1Cur3C4C5M6Me7jan_Mecinus_janthinus_ameie_idba.143        | -XXXXXX-XXXX           | CP1Cur3C4C5M6Me7jan_Mecinus_janthinus_ameie_idba.143_MERGED        |
| -XXX-----X-----   | CP1Cur3C4Ce5Ce7obs      | --XXXXXXXXXX-XXXX     | CP1Cur3C4Ce5Ce7obs_Ceutorhynchus_obstrictus_JN163956        | -XXXXXXXXXX-XX-        | CP1Cur3C4Ce5Ce7obs_Ceutorhynchus_obstrictus_JN163956_MERGED        |
| -X-----XX-----    | CP1Cur3C4Ce5Mon7pun     | XXXXXXXXXXXXXXXX-XXXX | CP1Cur3C4Ce5Mon7pun_Mononychus_punctumalbum_Curc_idba.3     | XXXXXXXXXXXXXXXX-XXXX  | CP1Cur3C4Ce5Mon7pun_Mononychus_punctumalbum_Curc_idba.3_MERGED     |
| -XX-----X-----    | CP1Cur3C4Ce5Rh7per      | XXXXXXXXXXXXXXXX-XXXX | CP1Cur3C4Ce5Rh7per_Rhinoncus_pericarpus_Curc_idba.24        | XXXXXXXXXXXXXXXX-XXXX  | CP1Cur3C4Ce5Rh7per_Rhinoncus_pericarpus_Curc_idba.24_MERGED        |
| -X-----X---X-     | CP1Cur3C4C15C17ole      | --XXXXXXXXXX-XXXX     | CP1Cur3C4C15C17ole_Cionus_olens_JN163958                    | -XXXXXXXXXX-XX-        | CP1Cur3C4C15C17ole_Cionus_olens_JN163958_MERGED                    |
| -XX-----X-X-XX-   | CP1Cur3C4C15La7tur      | --XXXXXXXXXX-XXXX     | CP1Cur3C4C15La7tur_Larinus_turbinatus_JN163952              | -XXXXXXXXXX-XX-        | CP1Cur3C4C15La7tur_Larinus_turbinatus_JN163952_MERGED              |
| -X-----XX-----    | CP1Cur3C4C5C6Co7cyc     | XXXXXXXXXXXXXXXX-XXXX | CP1Cur3C4C5C6Co7cyc_Coptonotus_cyclopus_Curc_idba.67        | XXXXXXXXXXXXXXXX-XXXX  | CP1Cur3C4C5C6Co7cyc_Coptonotus_cyclopus_Curc_idba.67_MERGED        |
| -XX-----XX-----   | CP1Cur3C4Cr5Ac7mis      | -----XXXXXXXXXX-XXXX  | CP1Cur3C4Cr5Ac7mis_Acalles_misellus_BIUK_idba.57            | -XX-XXXXXXXXXXXX-XX-   | CP1Cur3C4Cr5Ac7mis_Acalles_misellus_BIUK_idba.57_MERGED            |
| -XX-----XX-XX-    | CP1Cur3C4Cr5Ac7pti      | XXXXXXXXXXXXXXXX-XXXX | CP1Cur3C4Cr5Ac7pti_Acalles_ptinoides_BIUK_idba.42           | XXXXXXXXXXXXXXXX-XX-   | CP1Cur3C4Cr5Ac7pti_Acalles_ptinoides_BIUK_idba.42_MERGED           |
| -X-----XX-----    | CP1Cur3C4Cr5Ec7and      | XXXX-XXXX             | CP1Cur3C4Cr5Ec7and_Echinodera_andalusiensis_Soil_idba.193   | XXXX-XXXX-XX-----      | CP1Cur3C4Cr5Ec7and_Echinodera_andalusiensis_Soil_idba.193_MERGED   |
| -X-----XX-----    | CP1Cur3C4Cr5Ky7aub      | --XXXXXXXXXX-XXXX     | CP1Cur3C4Cr5Ky7aub_Kyklioacalles_aubei_JN163957             | XXXXXXXXXXXXXXXX-XXXX  | CP1Cur3C4Cr5Ky7aub_Kyklioacalles_aubei_JN163957_MERGED             |
| -X-----XX-----    | CP1Cur3C4Cr5Ky7rob      | -----XXXXXX-XXXX      | CP1Cur3C4Cr5Ky7rob_Kyklioacalles_roboris_BIUK_idba.79       | -X-----XXXXXX-XXXX     | CP1Cur3C4Cr5Ky7rob_Kyklioacalles_roboris_BIUK_idba.79_MERGED       |
| -XX-----XXX-X-X   | CP1Cur3C4Cr5Ou7squ      | XXXXXXXXXXXXXXXX-XXXX | CP1Cur3C4Cr5Ou7squ_Ouroperopterus_squamiventris_Curc_idba.5 | XXXXXXXXXXXXXXXX-X-X   | CP1Cur3C4Cr5Ou7squ_Ouroperopterus_squamiventris_Curc_idba.5_MERGED |
| -X-----XX-----    | CP1Cur3C4Cy5D17man      | XXXXXXXXXXXX-XXXX     | CP1Cur3C4Cy5D17man_Dichotrachelus_manueli_Curc_idba.88      | XXXXXXXXXXXX-XXXX      | CP1Cur3C4Cy5D17man_Dichotrachelus_manueli_Curc_idba.88_MERGED      |
| -XX-----XX-----   | CP1Cur3C4D5Co7sor       | XXXXXXXXXXXXXXXX-XXXX | CP1Cur3C4D5Co7sor_Cosmopolites_sordidus_Curc_idba.8         | XXXXXXXXXXXXXXXX-XXXX  | CP1Cur3C4D5Co7sor_Cosmopolites_sordidus_Curc_idba.8_MERGED         |
| -XX-----XXX-      | CP1Cur3C4D5Rhi7bar      | XXXXXXXXXXXXXXXX-XXXX | CP1Cur3C4D5Rhi7bar_Rhinostomus_barbirostris_Panama_idba.10  | XXXXXXXXXXXXXXXX-XXXX  | CP1Cur3C4D5Rhi7bar_Rhinostomus_barbirostris_Panama_idba.10_MERGED  |
| -X-X-----XXXX     | CP1Cur3C4D5Si7gra       | --XXXXXX-XX-----      | CP1Cur3C4D5Si7gra_Sitophilus_granarius_JN163959             | -XXXXXX-XX-----XXXX    | CP1Cur3C4D5Si7gra_Sitophilus_granarius_JN163959_MERGED             |
| -XXX-----X-X-XX-  | CP1Cur3C4E5B6St7mel     | --XXXXXXXXXX-XXXX     | CP1Cur3C4E5B6St7mel_Strophosoma_melanogrammum_JN163949      | -XXXXXXXXXXXX-XX-      | CP1Cur3C4E5B6St7mel_Strophosoma_melanogrammum_JN163949_MERGED      |
| -----XX-----      | CP1Cur3C4E5G6Ba7obs     | -XXXXXXXXXX-XXXX      | CP1Cur3C4E5G6Ba7obs_Barynotus_obscurus_JN163950             | -XXXXXXXXXX-XX-        | CP1Cur3C4E5G6Ba7obs_Barynotus_obscurus_JN163950_MERGED             |
| XXXXXXXXXXXX-XXXX | CP1Cur3C4E5N6Na7xan     | XXXXXXXXXXXXXXXX-XXXX | CP1Cur3C4E5N6Na7xan_Naupactus_xanthographus_NC_018354       | XXXXXXXXXXXXXXXX-XXXX  | CP1Cur3C4E5N6Na7xan_Naupactus_xanthographus_NC_018354_MERGED       |
| -X-X-----XX-----  | CP1Cur3C4E5Ot60T7mor    | XXXXXXXXXXXX-XXXX     | CP1Cur3C4E5Ot60T7mor_Otiorhynchus_morio_ameie_idba.90       | XXXXXXXXXXXX-XXXX      | CP1Cur3C4E5Ot60T7mor_Otiorhynchus_morio_ameie_idba.90_MERGED       |
| -XXX-----X-----   | CP1Cur3C4E5Ot60T7rug    | --XXXXXXXXXX-XXXX     | CP1Cur3C4E5Ot60T7rug_Otiorhynchus_rugosostriatus_JN163969   | -XXXXXXXXXXXX-XXXX     | CP1Cur3C4E5Ot60T7rug_Otiorhynchus_rugosostriatus_JN163969_MERGED   |
| -XXX-----X-XXXX-  | CP1Cur3C4E5Ot60T7sul    | XXXXXXXXXXXXXXXX-XXXX | CP1Cur3C4E5Ot60T7sul_Otiorhynchus_sulcatus_Curc_idba.36     | XXXXXXXXXXXXXXXX-XXXX  | CP1Cur3C4E5Ot60T7sul_Otiorhynchus_sulcatus_Curc_idba.36_MERGED     |
| -X-----XX-----    | CP1Cur3C4E5Po6Po7mar    | --XXXXXXXXXX-XXXX     | CP1Cur3C4E5Po6Po7mar_Polydrusus_marginatus_JN039360         | -XXXXXXXXXXXX-XXXX     | CP1Cur3C4E5Po6Po7mar_Polydrusus_marginatus_JN039360_MERGED         |
| -XX-----XX-----   | CP1Cur3C4E5S6Si7dis     | XXXXXXXXXXXXXXXX-XXXX | CP1Cur3C4E5S6Si7dis_Sitona_discoideus_Soil_idba.86          | XXXXXXXXXXXXXXXX-XX    | CP1Cur3C4E5S6Si7dis_Sitona_discoideus_Soil_idba.86_MERGED          |
| -XX-----X---X-    | CP1Cur3C4E5S6Si7lin     | --XXXXXXXXXX-XXXX     | CP1Cur3C4E5S6Si7lin_Sitona_lineatus_JN163948                | -XXXXXXXXXXXX-XX-      | CP1Cur3C4E5S6Si7lin_Sitona_lineatus_JN163948_MERGED                |
| -X-----XX-----    | CP1Cur3C4E5T6T77ele     | XXXXXXXXXXXX-XXXX     | CP1Cur3C4E5T6T77ele_Tropiphorus_elevatus_ameie_idba.114     | XXXXXXXXXXXX-XXXX      | CP1Cur3C4E5T6T77ele_Tropiphorus_elevatus_ameie_idba.114_MERGED     |
| -----XXX----      | CP1Cur3C4H5Hy7bru       | XXXXXXXXXXXXXXXX-XXXX | CP1Cur3C4H5Hy7bru_Hypera_brunneipennis_Soil_idba.79         | XXXXXXXXXXXXXXXX-XXXX  | CP1Cur3C4H5Hy7bru_Hypera_brunneipennis_Soil_idba.79_MERGED         |
| -XXX-----XXXX-    | CP1Cur3C4H5Hy7pos       | --XXXXXXXXXX-XXXX     | CP1Cur3C4H5Hy7pos_Hypera_postica_JN163953                   | -XXXXXXXXXXXXXXXX-XXXX | CP1Cur3C4H5Hy7pos_Hypera_postica_JN163953_MERGED                   |
| -XX-----X-----    | CP1Cur3C4M5H6Hy7abi     | --XXXXXXXXXX-XXXX     | CP1Cur3C4M5H6Hy7abi_Hylobius_abietis_JN163954               | -XXXXXXXXXXXX-XXXX     | CP1Cur3C4M5H6Hy7abi_Hylobius_abietis_JN163954_MERGED               |
| XXXXXXXX-XXXX-    | CP1Cur3C4M5H6Hy17xia    | XXXXXXXXXXXXXXXX-XXXX | CP1Cur3C4M5H6Hy17xia_Hylobitelus_xiaoi_NC_022680            | XXXXXXXXXXXXXXXX-XXXX  | CP1Cur3C4M5H6Hy17xia_Hylobitelus_xiaoi_NC_022680_MERGED            |
| -X-----X-----     | CP1Cur3C4M5P6P17pin     | XXXXXXXXXXXXXXXX-XXXX | CP1Cur3C4M5P6P17pin_Pissodes_pini_Curc_idba.48              | XXXXXXXXXXXXXXXX-XXXX  | CP1Cur3C4M5P6P17pin_Pissodes_pini_Curc_idba.48_MERGED              |
| -X-----XX-----    | CP1Cur3C4P6Dia7uni      | XXXXXXXXXXXXXXXX-XXXX | CP1Cur3C4P6Dia7uni_Diapus_unispneus_Curc_idba.33            | XXXXXXXXXXXXXXXX-XXXX  | CP1Cur3C4P6Dia7uni_Diapus_unispneus_Curc_idba.33_MERGED            |
| -XX-----XX-----   | CP1Cur3C4P6Eu7par       | XXXXXXXXXXXXXXXX-XXXX | CP1Cur3C4P6Eu7par_Euplatypus_parallelus_Scoly_idba.25       | XXXXXXXXXXXXXXXX-XXXX  | CP1Cur3C4P6Eu7par_Euplatypus_parallelus_Scoly_idba.25_MERGED       |
| -XX-----XX-----   | CP1Cur3C4P6P17cyl       | XXXXXXXXXXXXXXXX-XXXX | CP1Cur3C4P6P17cyl_Platypus_cylindrus_Curc_idba.22           | XXXXXXXXXXXXXXXX-XX-   | CP1Cur3C4P6P17cyl_Platypus_cylindrus_Curc_idba.22_MERGED           |

|                   |                      |                       |                                                             |                       |                                                                    |
|-------------------|----------------------|-----------------------|-------------------------------------------------------------|-----------------------|--------------------------------------------------------------------|
| -XX-----X--XX-    | CP1Cur3C4Po5Li7tes   | --XXXXXXXXX-----      | CP1Cur3C4Po5Li7tes_Liophloeus_tessulatus_JN163947           | -XXXXXXXXXX--XX-      | CP1Cur3C4Po5Li7tes_Liophloeus_tessulatus_JN163947_MERGED           |
| -XX-----X-----    | CP1Cur3C4Rh5Rh7que   | XXXXXXXXXXXXXXXXX---- | CP1Cur3C4Rh5Rh7que_Rhynchaenus_quercus_BIUK_idba.11         | XXXXXXXXXXXXXXXXX---- | CP1Cur3C4Rh5Rh7que_Rhynchaenus_quercus_BIUK_idba.11_MERGED         |
| -X-----X-----     | CP1Cur3C4S5An7dis    | XXXXXXXXXXXXXXXXX---- | CP1Cur3C4S5An7dis_Anisandrus_dispr_Scoly_idba.47            | XXXXXXXXXXXXXXXXX---- | CP1Cur3C4S5An7dis_Anisandrus_dispr_Scoly_idba.47_MERGED            |
| -XX-----XX---     | CP1Cur3C4S5Co7cyp    | XXXXXXXXXXXXXXXXX---- | CP1Cur3C4S5Co7cyp_Coccotrypes_cyper_i FG_idba.60            | XXXXXXXXXXXXXXXXX---- | CP1Cur3C4S5Co7cyp_Coccotrypes_cyper_i FG_idba.60_MERGED            |
| -X-----X-----     | CP1Cur3C4S5Co7rub    | XXXXXXXXX-----        | CP1Cur3C4S5Co7rub_Corthylus_rubricollis_Curc_idba.99        | XXXXXXXXX-----X---    | CP1Cur3C4S5Co7rub_Corthylus_rubricollis_Curc_idba.99_MERGED        |
| -X-----X-----     | CP1Cur3C4S5Cr7sal    | XXXXXXXXXXXXXXXXX---- | CP1Cur3C4S5Cr7sal_Cryphalus_saltuarius_Curc_idba.19         | XXXXXXXXXXXXXXXXX---- | CP1Cur3C4S5Cr7sal_Cryphalus_saltuarius_Curc_idba.19_MERGED         |
| -X-----X-----     | CP1Cur3C4S5Cry7pus   | XXXXXXXXXXXXXXXXX---- | CP1Cur3C4S5Cry7pus_Crypturgus_pusillus_Curc_idba.42         | XXXXXXXXXXXXXXXXX---- | CP1Cur3C4S5Cry7pus_Crypturgus_pusillus_Curc_idba.42_MERGED         |
| -X-----X-----     | CP1Cur3C4S5Cyc7bod   | XXXXXXXXXXXXXXXXX---- | CP1Cur3C4S5Cyc7bod_Cyclorhipidion_bodoanus_Scoly_idba.52    | XXXXXXXXXXXXXXXXX---- | CP1Cur3C4S5Cyc7bod_Cyclorhipidion_bodoanus_Scoly_idba.52_MERGED    |
| -X-----X-----     | CP1Cur3C4S5D17ine    | XXXXXXXXXXXXXXXXX---- | CP1Cur3C4S5D17ine_Diamerus_inermis_Curc_idba.58             | XXXXXXXXXXXXXXXXX---- | CP1Cur3C4S5D17ine_Diamerus_inermis_Curc_idba.58_MERGED             |
| -XX-----XXXX-     | CP1Cur3C4S5Dry7aut   | -----XXXX-----        | CP1Cur3C4S5Dry7aut_Dryocoetes_autographus_Curc_idba.118     | -XX-----XXXXXX-       | CP1Cur3C4S5Dry7aut_Dryocoetes_autographus_Curc_idba.118_MERGED     |
| -X-----X-----     | CP1Cur3C4S5Dry7vil   | XXXXXXXXXXXXXXXXX---- | CP1Cur3C4S5Dry7vil_Dryocoetes_villosus_Scoly_idba.38        | XXXXXXXXXXXXXXXXX---- | CP1Cur3C4S5Dry7vil_Dryocoetes_villosus_Scoly_idba.38_MERGED        |
| -X-----X-----     | CP1Cur3C4S5Ern7fag   | XXXXXXXXXXXXXXXXX---- | CP1Cur3C4S5Ern7fag_Ernoporicus_fagi_amie_idba.75            | XXXXXXXXXXXXXXXXX---- | CP1Cur3C4S5Ern7fag_Ernoporicus_fagi_amie_idba.75_MERGED            |
| -XX-----X---      | CP1Cur3C4S5Gna7mat   | XXXXXXXXXXXXXXXXX---- | CP1Cur3C4S5Gna7mat_Gnathotrichus_materiarius_Scoly_idba.22  | XXXXXXXXXXXXXXXXX---- | CP1Cur3C4S5Gna7mat_Gnathotrichus_materiarius_Scoly_idba.22_MERGED  |
| -X-----XXX-       | CP1Cur3C4S5Hyla7ate  | XXXXXXXXXXXXXXXXX---- | CP1Cur3C4S5Hyla7ate_Hylastes_ater_Scoly_idba.54             | XXXXXXXXXXXXXXXXX---- | CP1Cur3C4S5Hyla7ate_Hylastes_ater_Scoly_idba.54_MERGED             |
| -X-----X-----     | CP1Cur3C4S5Hyla7att  | XXXXXXXXXXXXXXXXX---- | CP1Cur3C4S5Hyla7att_Hylastes_attenuatus_Scoly_idba.12       | XXXXXXXXXXXXXXXXX---- | CP1Cur3C4S5Hyla7att_Hylastes_attenuatus_Scoly_idba.12_MERGED       |
| -X-----XXX-       | CP1Cur3C4S5Hyla7bru  | XXXXXXXXXXXXXXXXX---- | CP1Cur3C4S5Hyla7bru_Hylastes_brunneus_Scoly_idba.41         | XXXXXXXXXXXXXXXXX---- | CP1Cur3C4S5Hyla7bru_Hylastes_brunneus_Scoly_idba.41_MERGED         |
| -X-----XXX-       | CP1Cur3C4S5Hyla7opa  | XXXXXXXXXXXXXXXXX---- | CP1Cur3C4S5Hyla7opa_Hylastes_opacus_Curc_idba.62            | XXXXXXXXXXXXXXXXX---- | CP1Cur3C4S5Hyla7opa_Hylastes_opacus_Curc_idba.62_MERGED            |
| -X-----XXX-       | CP1Cur3C4S5Hyle7var  | --XXXXX-----          | CP1Cur3C4S5Hyle7var_Hylesinus_varius_amie_idba.170          | -XXXXXX-----XXX-      | CP1Cur3C4S5Hyle7var_Hylesinus_varius_amie_idba.170_MERGED          |
| -X-----X--XXX-    | CP1Cur3C4S5Hylur7pal | XXXXXXXXXXXXXXXXX---- | CP1Cur3C4S5Hylur7pal_Hylurgops_palliatus_Scoly_idba.48      | XXXXXXXXXXXXXXXXX---- | CP1Cur3C4S5Hylur7pal_Hylurgops_palliatus_Scoly_idba.48_MERGED      |
| -X-----X-----     | CP1Cur3C4S5Hypo7fic  | XXXXXXXXXXXXXXXXX---- | CP1Cur3C4S5Hypo7fic_Hypoborus_ficus_Curc_idba.77            | XXXXXXXXXXXXXXXXX---- | CP1Cur3C4S5Hypo7fic_Hypoborus_ficus_Curc_idba.77_MERGED            |
| -XX-----X--XXX-   | CP1Cur3C4S5Ip7acu    | XXXXXXXXXXXXXXXXX---- | CP1Cur3C4S5Ip7acu_Ips_acuminatus_Curc_idba.2                | XXXXXXXXXXXXXXXXX---- | CP1Cur3C4S5Ip7acu_Ips_acuminatus_Curc_idba.2_MERGED                |
| -X-----X--XXX-    | CP1Cur3C4S5Ip7cem    | --XXX--XXX-----       | CP1Cur3C4S5Ip7cem_Ips_cembrae_JN163961                      | -XXX--XXX--XXX-       | CP1Cur3C4S5Ip7cem_Ips_cembrae_JN163961_MERGED                      |
| -XX-----X--XXX-   | CP1Cur3C4S5Ip7sex    | XXXXXXXXXXXXXXXXX---- | CP1Cur3C4S5Ip7sex_Ips_sexdentatus_Scoly_idba.4              | XXXXXXXXXXXXXXXXX---- | CP1Cur3C4S5Ip7sex_Ips_sexdentatus_Scoly_idba.4_MERGED              |
| -XX-----X--XX-    | CP1Cur3C4S5Or7lar    | XXXXXXXXXXXXXXXXX---- | CP1Cur3C4S5Or7lar_Orthotomicus_laricis_Scoly_idba.3         | XXXXXXXXXXXXXXXXX--X- | CP1Cur3C4S5Or7lar_Orthotomicus_laricis_Scoly_idba.3_MERGED         |
| -X-----X--X---    | CP1Cur3C4S5P17qua    | XXXXXXXXXXXXXXXXX---- | CP1Cur3C4S5P17qua_Pityogenes_quadridens_Scoly_idba.23       | XXXXXXXXXXXXXXXXX---- | CP1Cur3C4S5P17qua_Pityogenes_quadridens_Scoly_idba.23_MERGED       |
| -XX-----XXXX-     | CP1Cur3C4S5P17tre    | XXXXXXXXXXXXXXXXX---- | CP1Cur3C4S5P17tre_Pityogenes_trepanatus_Scoly_idba.5        | XXXXXXXXXXXXXXXXX---- | CP1Cur3C4S5P17tre_Pityogenes_trepanatus_Scoly_idba.5_MERGED        |
| -X-----X-----     | CP1Cur3C4S5Pity7mic  | XXXXXXXXXXXXXXXXX---- | CP1Cur3C4S5Pity7mic_Pityophthorus_micrographus_Curc_idba.39 | XXXXXXXXXXXXXXXXX---- | CP1Cur3C4S5Pity7mic_Pityophthorus_micrographus_Curc_idba.39_MERGED |
| -X-----X-----     | CP1Cur3C4S5Pity7pub  | XXXXXXXXXXXXXXXXX---- | CP1Cur3C4S5Pity7pub_Pityophthorus_pubescens_Scoly_idba.14   | XXXXXXXXXXXXXXXXX---- | CP1Cur3C4S5Pity7pub_Pityophthorus_pubescens_Scoly_idba.14_MERGED   |
| -XX-----X---      | CP1Cur3C4S5Po7pol    | XXXXXXXXXXXXXXXXX---- | CP1Cur3C4S5Po7pol_Polygraphus_poligraphus_Curc_idba.16      | XXXXXXXXXXXXXXXXX---- | CP1Cur3C4S5Po7pol_Polygraphus_poligraphus_Curc_idba.16_MERGED      |
| -XX-----X--XX--X  | CP1Cur3C4S5Pr7cav    | XXXXXXXXXXXXXXXXX---- | CP1Cur3C4S5Pr7cav_Premnobius_cavipennis_Curc_idba.4         | XXXXXXXXXXXXXXXXX--X  | CP1Cur3C4S5Pr7cav_Premnobius_cavipennis_Curc_idba.4_MERGED         |
| -XX-----XX---     | CP1Cur3C4S5Sa7dam    | XXXXXXXXX-----        | CP1Cur3C4S5Sa7dam_Sampsonius_dampfi_Scoly_idba.59           | XXXXXXXXX-----XX---   | CP1Cur3C4S5Sa7dam_Sampsonius_dampfi_Scoly_idba.59_MERGED           |
| -X-----X-----     | CP1Cur3C4S5Scol7sco  | XXXXXXXXXXXXXXXXX---- | CP1Cur3C4S5Scol7sco_Scolytus_scolytus_Curc_idba.23          | XXXXXXXXXXXXXXXXX---- | CP1Cur3C4S5Scol7sco_Scolytus_scolytus_Curc_idba.23_MERGED          |
| -X-----XXX-       | CP1Cur3C4S5Te7dew    | -XXXXXXXX-----        | CP1Cur3C4S5Te7dew_Tesserocerus_dewalquei_Curc_idba.95       | -XXXXXXXX-----XXX-    | CP1Cur3C4S5Te7dew_Tesserocerus_dewalquei_Curc_idba.95_MERGED       |
| -XX-----XXXX-     | CP1Cur3C4S5To7pin    | XXXXXXXXXXXXXXXXX---- | CP1Cur3C4S5To7pin_Tomicus_piniperda_Scoly_idba.17           | XXXXXXXXXXXXXXXXX---- | CP1Cur3C4S5To7pin_Tomicus_piniperda_Scoly_idba.17_MERGED           |
| -X-----X-----     | CP1Cur3C4S5Tr7dom    | XXXXXXXXXXXXXXXXX---- | CP1Cur3C4S5Tr7dom_Trypodendron_domesticum_Scoly_idba.7      | XXXXXXXXXXXXXXXXX---- | CP1Cur3C4S5Tr7dom_Trypodendron_domesticum_Scoly_idba.7_MERGED      |
| -XX-----X---      | CP1Cur3C4S5Tr7sig    | XXXXXXXXXXXXXXXXX---- | CP1Cur3C4S5Tr7sig_Trypodendron_signatum_Scoly_idba.49       | XXXXXXXXXXXXXXXXX---- | CP1Cur3C4S5Tr7sig_Trypodendron_signatum_Scoly_idba.49_MERGED       |
| -XX-----XXX-      | CP1Cur3C4S5Xy7saxe   | XXXXXXXXXXXXXXXXX---- | CP1Cur3C4S5Xy7saxe_Xyleborinus_saxesenii_Scoly_idba.28      | XXXXXXXXXXXXXXXXX---- | CP1Cur3C4S5Xy7saxe_Xyleborinus_saxesenii_Scoly_idba.28_MERGED      |
| -XX-----XX---     | CP1Cur3C4S5Xyl7aff   | XXXXXXXXXXXXXXXXX---- | CP1Cur3C4S5Xyl7aff_Xyleborus_affinis_Scoly_idba.33          | XXXXXXXXXXXXXXXXX---- | CP1Cur3C4S5Xyl7aff_Xyleborus_affinis_Scoly_idba.33_MERGED          |
| -XX-----XX---     | CP1Cur3C4S5Xyl7per   | XXXXXXXXXXXXXXXXX---- | CP1Cur3C4S5Xyl7per_Xyleborus_perforans_Scoly_idba.27        | XXXXXXXXXXXXXXXXX---- | CP1Cur3C4S5Xyl7per_Xyleborus_perforans_Scoly_idba.27_MERGED        |
| -X-----X-----     | CP1Cur3C4S5Xyl7vol   | XXXXXXXXX-----        | CP1Cur3C4S5Xyl7vol_Xyleborus_volvulus_Scoly_idba.63         | XXXXXXXXX-----X---    | CP1Cur3C4S5Xyl7vol_Xyleborus_volvulus_Scoly_idba.63_MERGED         |
| -X-----X-----     | CP1Cur3C4S5Xyl7com   | XXXXXXXXXXXXXXXXX---- | CP1Cur3C4S5Xyl7com_Xylosandrus_compactus_FG_idba.55         | XXXXXXXXXXXXXXXXX---- | CP1Cur3C4S5Xyl7com_Xylosandrus_compactus_FG_idba.55_MERGED         |
| -XX-----XX---     | CP1Cur3C4S5Xyl7cra   | XXXXXXXXXXXXXXXXX---- | CP1Cur3C4S5Xyl7cra_Xylosandrus_crassiusculus_Scoly_idba.34  | XXXXXXXXXXXXXXXXX---- | CP1Cur3C4S5Xyl7cra_Xylosandrus_crassiusculus_Scoly_idba.34_MERGED  |
| -XX-----X---      | CP1Cur3C4S5Xyl7ger   | XXXXXXXXXXXXXXXXX---- | CP1Cur3C4S5Xyl7ger_Xylosandrus_germanus_Scoly_idba.35       | XXXXXXXXXXXXXXXXX---- | CP1Cur3C4S5Xyl7ger_Xylosandrus_germanus_Scoly_idba.35_MERGED       |
| -X-----X-----     | CP1Cur3C4S5Xyl7mor   | XXXXXXXXXXXXXXXXX---- | CP1Cur3C4S5Xyl7mor_Xylosandrus_morigerus_Scoly_idba.37      | XXXXXXXXXXXXXXXXX---- | CP1Cur3C4S5Xyl7mor_Xylosandrus_morigerus_Scoly_idba.37_MERGED      |
| -X-----X-----     | CP1Cur3C4S5Xyl7mac   | XXXXXXXXXXXXXXXXX---- | CP1Cur3C4S5Xyl7mac_Xyloctonus_maculatus_Curc_idba.71        | XXXXXXXXXXXXXXXXX---- | CP1Cur3C4S5Xyl7mac_Xyloctonus_maculatus_Curc_idba.71_MERGED        |
| -XX-----XX---     | CP1Cur3C4T5T7pus     | XXXXXXXXXXXXXXXXX---- | CP1Cur3C4T5T7pus_Tychius_pusillus_Soil_idba.71              | XXXXXXXXXXXXXXXXX---- | CP1Cur3C4T5T7pus_Tychius_pusillus_Soil_idba.71_MERGED              |
| -X-----X--XXX-    | CP1Cur3M4D07aus      | -XXXXXXXX-----        | CP1Cur3M4D07aus_Doydirhynchus_austriacus_JN163964           | -XXXXXXXX-----XXX-    | CP1Cur3M4D07aus_Doydirhynchus_austriacus_JN163964_MERGED           |
| -XX-----XX--XXX-  | CP1D3D4Da7cer        | -XXXXXXXX-----        | CP1D3D4Da7cer_Dascillus_cervinus_JQ034414                   | -XXXXXXXX-----XXX-    | CP1D3D4Da7cer_Dascillus_cervinus_JQ034414_MERGED                   |
| -XX-----XXXX-     | CP1E3C4C5Ca7pel      | -XXXXXXXX-----        | CP1E3C4C5Ca7pel_Cantharis_pellucida_HQ232817                | -XXXXXXXX-----XXXX-   | CP1E3C4C5Ca7pel_Cantharis_pellucida_HQ232817_MERGED                |
| -X-----X-----     | CP1E3C4C5Ca7tri      | -XXXXXXXX-----        | CP1E3C4C5Ca7tri_Cantharis_tristis_amie_idba.95              | -XXXXXXXX-----X-----  | CP1E3C4C5Ca7tri_Cantharis_tristis_amie_idba.95_MERGED              |
| XXXXXXXXXX-XXXXXX | CP1E3C4Ch5Ch7opa     | XXXXXXXXXXXXXXXXX---- | CP1E3C4Ch5Ch7opa_Chauliognathus_opacus_NC_013576            | XXXXXXXXXXXXXXXXX---- | CP1E3C4Ch5Ch7opa_Chauliognathus_opacus_NC_013576_MERGED            |
| -X-----X-----     | CP1E3C4M5Ma7bal      | XXXXXXXXXXXXXXXXX---- | CP1E3C4M5Ma7bal_Malthinus_balteatus_Soil_idba.38            | XXXXXXXXXXXXXXXXX---- | CP1E3C4M5Ma7bal_Malthinus_balteatus_Soil_idba.38_MERGED            |
| -XX-----XXXX-     | CP1E3C4M5Ma7mar      | XXXXXXX-----          | CP1E3C4M5Ma7mar_Malthodes_marginatus_BIUK_idba.61           | XXXXXXX-----XXXX-     | CP1E3C4M5Ma7mar_Malthodes_marginatus_BIUK_idba.61_MERGED           |
| -XX-----XX--XXX-  | CP1E3D4Dr7fla        | XXXXXXXXXXXXXXXXX---- | CP1E3D4Dr7fla_Drilus_flavescens_HQ232815                    | XXXXXXXXXXXXXXXXX---- | CP1E3D4Dr7fla_Drilus_flavescens_HQ232815_MERGED                    |
| XXXX-XXXXX-X-X--- | CP1E3E4A5Py7div      | XXXXXXXXXXXXXXXXX---- | CP1E3E4A5Py7div_Pyrophorus_divergens_NC_009964              | XXXXXXXXXXXXXXXXX---- | CP1E3E4A5Py7div_Pyrophorus_divergens_NC_009964_MERGED              |

|                      |                      |                       |                                                           |                          |                                                                  |
|----------------------|----------------------|-----------------------|-----------------------------------------------------------|--------------------------|------------------------------------------------------------------|
| -XX-----XX-XXX       | CP1E3E4C5Dc7c9in     | -XXXXXXXXXX-----      | CP1E3E4C5Dc7c9in_Dicronychus_cinereus_amie.idba.96        | -XXXXXXXXXXXX-XXX        | CP1E3E4C5Dc7c9in_Dicronychus_cinereus_amie.idba.96_MERGED        |
| -X-----XX-XXX        | CP1E3E4D5Ca7bip      | XXXXXXXXXXXXXXXX----- | CP1E3E4D5Ca7bip_Calambus_bipustulatus_BIUK.idba.31        | XXXXXXXXXXXXXXXX-----    | CP1E3E4D5Ca7bip_Calambus_bipustulatus_BIUK.idba.31_MERGED        |
| -X-----XX-XXX        | CP1E3E4D5Hyp7inu     | XXXXXXXXXXXXXXXX----- | CP1E3E4D5Hyp7inu_Hypoganus_inunctus_amie.idba.58          | XXXXXXXXXXXXXXXX-----    | CP1E3E4D5Hyp7inu_Hypoganus_inunctus_amie.idba.58_MERGED          |
| -XX-----XX-XXX       | CP1E3E4D5PH7que      | XXXXXXXXXX-----       | CP1E3E4D5PH7que_Pheletes_quercus_amie.idba.137            | XXXXXXXXXX-----XX-XXX    | CP1E3E4D5PH7que_Pheletes_quercus_amie.idba.137_MERGED            |
| -X-----XX-XXX        | CP1E3E4De5An7cas     | XXXXXXXXXXXXXXXX----- | CP1E3E4De5An7cas_Anostirus_castaneus_amie.idba.28         | XXXXXXXXXXXXXXXX-----    | CP1E3E4De5An7cas_Anostirus_castaneus_amie.idba.28_MERGED         |
| -XX-----XX-XXX       | CP1E3E4De5At7hae     | XXXXXXXXXXXXXXXX----- | CP1E3E4De5At7hae_Athous_haemorrhoidalis_2VGB.idba.8       | XXXXXXXXXXXXXXXX-----XXX | CP1E3E4De5At7hae_Athous_haemorrhoidalis_2VGB.idba.8_MERGED       |
| -XX-----XX-XXX       | CP1E3E4De5Lim7min    | XXXXXXXXXXXXXXXX----- | CP1E3E4De5Lim7min_Limonius_minutus_amie.idba.27           | XXXXXXXXXXXXXXXX-----    | CP1E3E4De5Lim7min_Limonius_minutus_amie.idba.27_MERGED           |
| -X-----XX-XXX        | CP1E3E4E5Ad7rac      | XXXXXXXXXXXXXXXX----- | CP1E3E4E5Ad7rac_Adrastus_rachifer_amie.idba.32            | XXXXXXXXXXXXXXXX-----    | CP1E3E4E5Ad7rac_Adrastus_rachifer_amie.idba.32_MERGED            |
| -XX-----XX-XXX       | CP1E3E4E5Ag7obs      | XXXXXXXXXXXXXXXX----- | CP1E3E4E5Ag7obs_Aagriotes_obscurus_2VGB.idba.10           | XXXXXXXXXXXXXXXX-----XXX | CP1E3E4E5Ag7obs_Aagriotes_obscurus_2VGB.idba.10_MERGED           |
| -XX-----XX-XXX       | CP1E3E4E5Ag7ust      | -XXXXXXXXXXXX-----    | CP1E3E4E5Ag7ust_Aagriotes_ustulatus_JX412737              | -XXXXXXXXXXXX-----XXX    | CP1E3E4E5Ag7ust_Aagriotes_ustulatus_JX412737_MERGED              |
| -X-----XX-XXX        | CP1E3E4E5Da7mar      | XXXXXXXXXXXXXXXX----- | CP1E3E4E5Da7mar_Dalopius_marginatus_BIUK.idba.34          | XXXXXXXXXXXXXXXX-----    | CP1E3E4E5Da7mar_Dalopius_marginatus_BIUK.idba.34_MERGED          |
| -X-----XX-XXX        | CP1E3E4E5Id7pic      | XXXXXXXXXXXXXXXX----- | CP1E3E4E5Id7pic_Idolus_picipennis_amie.idba.67            | XXXXXXXXXXXXXXXX-----    | CP1E3E4E5Id7pic_Idolus_picipennis_amie.idba.67_MERGED            |
| -XX-----XX-XXX       | CP1E3E4M5Me7vii      | XXXXXXXXXXXXXXXX----- | CP1E3E4M5Me7vii_Melanotus_villosus_2VGB.idba.11           | XXXXXXXXXXXXXXXX-----XXX | CP1E3E4M5Me7vii_Melanotus_villosus_2VGB.idba.11_MERGED           |
| -X-----XX-XXX        | CP1E3E4N5Ne7sab      | XXXXXX-----           | CP1E3E4N5Ne7sab_Negastrius_sabulicola_amie.idba.161       | XXXXXX-----              | CP1E3E4N5Ne7sab_Negastrius_sabulicola_amie.idba.161_MERGED       |
| -XX-----XX-XXX       | CP1E3E4U4Me7bup      | XXXXXXXXXXXXXXXX----- | CP1E3E4U4Me7bup_Melasis_buprestoides_amie.idba.87         | XXXXXXXXXXXXXXXX-----XXX | CP1E3E4U4Me7bup_Melasis_buprestoides_amie.idba.87_MERGED         |
| -XX-----X--XX-       | CP1E3L4L5La7noc      | XXXXXXXXXXXXXXXX----- | CP1E3L4L5La7noc_Lampyrus_noctiluca_amie.idba.10           | XXXXXXXXXXXXXXXX-----XX- | CP1E3L4L5La7noc_Lampyrus_noctiluca_amie.idba.10_MERGED           |
| XXXXXXXXXXXX-XXX-XXX | CP1E3L4L5Py7ruf      | XXXXXXXXXXXXXXXX----- | CP1E3L4L5Py7ruf_Pyrocoelia_rufa_NC_003970                 | XXXXXXXXXXXXXXXX-----    | CP1E3L4L5Py7ruf_Pyrocoelia_rufa_NC_003970_MERGED                 |
| XXXXXXXXXXXX-XXX-XXX | CP1E3L4Lu5Aq7lei     | XXXXXXXXXXXXXXXX----- | CP1E3L4Lu5Aq7lei_Aquatica_lei_NC_025276                   | XXXXXXXXXXXXXXXX-----    | CP1E3L4Lu5Aq7lei_Aquatica_lei_NC_025276_MERGED                   |
| XXXXXXXXXXXX-XXX-XXX | CP1E3L4Lu5Lu7cru     | XXXXXXXXXXXXXXXX----- | CP1E3L4Lu5Lu7cru_Luciola_cruciata_NC_022472               | XXXXXXXXXXXXXXXX-----    | CP1E3L4Lu5Lu7cru_Luciola_cruciata_NC_022472_MERGED               |
| -XX-----X--XXX       | CP1E3Ly4Be7tay       | XXXXXXXXXXXXXXXX----- | CP1E3Ly4Be7tay_Benibotarus_taygetanus_amie.idba.23        | XXXXXXXXXXXXXXXX-----XXX | CP1E3Ly4Be7tay_Benibotarus_taygetanus_amie.idba.23_MERGED        |
| -XX-----X--XXX       | CP1E3Ly4Dic7aur      | XXXXXXXXXXXXXXXX----- | CP1E3Ly4Dic7aur_Dictyoptera_aurora_JX412733               | XXXXXXXXXXXXXXXX-----XXX | CP1E3Ly4Dic7aur_Dictyoptera_aurora_JX412733_MERGED               |
| -X-----X--XXX        | CP1E3Ly4Li7gra       | -----XXXXXXXX-----    | CP1E3Ly4Li7gra_Libnetis_granicollis_JX412813              | -X-----XXXXXXXX-----     | CP1E3Ly4Li7gra_Libnetis_granicollis_JX412813_MERGED              |
| -XX-----X--XXX       | CP1E3Ly4Pl7cos       | XXXXXXXX-----         | CP1E3Ly4Pl7cos_Platycis_cosnardi_amie.idba.135            | XXXXXXXX-----X--XXX      | CP1E3Ly4Pl7cos_Platycis_cosnardi_amie.idba.135_MERGED            |
| -XX-----X-XX-XXX     | CP1E3040m7fon        | -XXXXXXXXXXXX-----    | CP1E3040m7fon_Omalisus_fontisbellaquei_JX412744           | -XXXXXXXXXXXX-----XXX    | CP1E3040m7fon_Omalisus_fontisbellaquei_JX412744_MERGED           |
| -X-----X--XXX        | CP1E30m4Dr7str       | -XXXXXXXXXXXX-----    | CP1E30m4Dr7str_Drilonius_striatulus_JX412822              | -XXXXXXXXXXXX-----XXX    | CP1E30m4Dr7str_Drilonius_striatulus_JX412822_MERGED              |
| XXXXXXXX-XXXXX-XXX   | CP1E3P4R5Rh7luf      | XXXXXXXXXXXXXXXX----- | CP1E3P4R5Rh7luf_Rhagophthalmus_lufengensis_NC_010969      | XXXXXXXXXXXXXXXX-----    | CP1E3P4R5Rh7luf_Rhagophthalmus_lufengensis_NC_010969_MERGED      |
| XXXXXXXXXXXXXXXX-XX- | CP1E3P4R5Rh7ohb      | XXXXXXXXXXXXXXXX----- | CP1E3P4R5Rh7ohb_Rhagophthalmus_ohbai_NC_010964            | XXXXXXXXXXXXXXXX-----XX- | CP1E3P4R5Rh7ohb_Rhagophthalmus_ohbai_NC_010964_MERGED            |
| -XX-----X--XXX       | CP1E3T4Tr7der        | XXXXXXXXXXXXXXXX----- | CP1E3T4Tr7der_Trixaqus_dermestoides_BIUK.idba.35          | XXXXXXXXXXXXXXXX-----XXX | CP1E3T4Tr7der_Trixaqus_dermestoides_BIUK.idba.35_MERGED          |
| -X-----X--XXX        | CP1H3H4H5Be7aff      | XXXXXXXXXXXXXXXX----- | CP1H3H4H5Be7aff_Berosus_affinis_1VWB.idba.9               | XXXXXXXXXXXXXXXX-----    | CP1H3H4H5Be7aff_Berosus_affinis_1VWB.idba.9_MERGED               |
| -XXX-----X-X-XXX     | CP1H3H4H5Cy7mar      | XXXXXXXXXXXXXXXX----- | CP1H3H4H5Cy7mar_Cymbiodyta_marginella_amie.idba.89        | XXXXXXXXXXXXXXXX-----XXX | CP1H3H4H5Cy7mar_Cymbiodyta_marginella_amie.idba.89_MERGED        |
| -XX-----XX-XXX       | CP1H3H4S5Ce7uni      | XXXXXXXXXXXXXXXX----- | CP1H3H4S5Ce7uni_Cercyon_unipunctatus_amie.idba.9          | XXXXXXXXXXXXXXXX-----    | CP1H3H4S5Ce7uni_Cercyon_unipunctatus_amie.idba.9_MERGED          |
| -XXX-----XX-XXX      | CP1H3H4S5Cr7min      | XXXXXXXXXXXXXXXX----- | CP1H3H4S5Cr7min_Cryptopleurum_minutum_Staph.idba.52       | XXXXXXXXXXXXXXXX-----XX- | CP1H3H4S5Cr7min_Cryptopleurum_minutum_Staph.idba.52_MERGED       |
| -X-----XX-XXX        | CP1H3H4S5Da7abd      | XXXXXXXXXXXXXXXX----- | CP1H3H4S5Da7abd_Dactylosternum_abdominale_amie.idba.74    | XXXXXXXXXXXXXXXX-----    | CP1H3H4S5Da7abd_Dactylosternum_abdominale_amie.idba.74_MERGED    |
| -XX-----X-X-XXX      | CP1H3H4S5Sp7bip      | XXXXXXXXXXXXXXXX----- | CP1H3H4S5Sp7bip_Sphaeridium_bipustulatum_Staph.idba.49    | XXXXXXXXXXXXXXXX-----XXX | CP1H3H4S5Sp7bip_Sphaeridium_bipustulatum_Staph.idba.49_MERGED    |
| -XX-----XXX-XX-      | CP1H3Hy4Hy7car       | XXXXXXXXXXXXXXXX----- | CP1H3Hy4Hy7car_Hydrochus_carinatus_729517_idba_contig_25  | XXXXXXXXXXXXXXXX-----XX- | CP1H3Hy4Hy7car_Hydrochus_carinatus_729517_idba_contig_25_MERGED  |
| -X-----XX-XXX        | CP1H13H4D5P6Ki7min   | XXXXXXXXXXXXXXXX----- | CP1H13H4D5P6Ki7min_Kissister_minimus_Soil.idba.27         | XXXXXXXXXXXXXXXX-----XX- | CP1H13H4D5P6Ki7min_Kissister_minimus_Soil.idba.27_MERGED         |
| -XX-----XXX-XXX      | CP1H13H4D5P6Pa7f1a   | -XXXXXXXXXXXX-----    | CP1H13H4D5P6Pa7f1a_Paromalus_flavicornis_JX412766         | -XXXXXXXXXXXX-----XXX    | CP1H13H4D5P6Pa7f1a_Paromalus_flavicornis_JX412766_MERGED         |
| -X-----XX-XXX        | CP1H13H4H5H16Mar7mer | XXXXXXXXXXXXXXXX----- | CP1H13H4H5H16Mar7mer_Margarinotus_merdarius_Staph.idba.57 | XXXXXXXXXXXXXXXX-----    | CP1H13H4H5H16Mar7mer_Margarinotus_merdarius_Staph.idba.57_MERGED |
| XXXXXXXXXXXXXXXX-XX- | CP1H13H4S5Eu7sci     | XXXXXXXXXXXXXXXX----- | CP1H13H4S5Eu7sci_Euspilotus_scissus_NC_018353             | XXXXXXXXXXXXXXXX-----XX- | CP1H13H4S5Eu7sci_Euspilotus_scissus_NC_018353_MERGED             |
| -XX-----XXX-XXX      | CP1L3L4Hy7der        | -XXXXXXXXXXXX-----    | CP1L3L4Hy7der_Hylecoetus_dermestoides_HQ232820            | -XXXXXXXXXXXX-----XXX    | CP1L3L4Hy7der_Hylecoetus_dermestoides_HQ232820_MERGED            |
| -XX-----XX-XXX       | CP1L3L4Ly7nav        | XXXXXXXXXXXXXXXX----- | CP1L3L4Ly7nav_Lymexylon_navale_amie.idba.55               | XXXXXXXXXXXXXXXX-----XX- | CP1L3L4Ly7nav_Lymexylon_navale_amie.idba.55_MERGED               |
| -X-----XX-XXX        | CP1S3H4Me7MEM1       | XXXXXXXXXXXXXXXX----- | CP1S3H4Me7MEM1_Meropathus_MEM1_675618_idba_contig_21      | XXXXXXXXXXXXXXXX-----XX- | CP1S3H4Me7MEM1_Meropathus_MEM1_675618_idba_contig_21_MERGED      |
| -X-----XX-XXX        | CP1S3L4C5Ag7lab      | -XXXXXXXXXXXX-----    | CP1S3L4C5Ag7lab_Agyrtodes_labralis_JX412779               | -XXXXXXXXXXXX-----XX-    | CP1S3L4C5Ag7lab_Agyrtodes_labralis_JX412779_MERGED               |
| -X-----XX-XXX        | CP1S3L4Ch5Ca7cor     | XXXXXXXXXXXXXXXX----- | CP1S3L4Ch5Ca7cor_Catops_coracinus_BIUK.idba.2             | XXXXXXXXXXXXXXXX-----XXX | CP1S3L4Ch5Ca7cor_Catops_coracinus_BIUK.idba.2_MERGED             |
| -X-----XX-XXX        | CP1S3L4Ch5Es7jea     | XXXXXX-----           | CP1S3L4Ch5Es7jea_Espnoliella_jeanneli_Staph.idba.86       | XXXXXX-----XX-XXX        | CP1S3L4Ch5Es7jea_Espnoliella_jeanneli_Staph.idba.86_MERGED       |
| -XX-----XX-XXX       | CP1S3L4Ch5Na7ve1     | -XXXXXXXXXXXX-----    | CP1S3L4Ch5Na7ve1_Nargus_velox_JX313674                    | -XXXXXXXXXXXX-----XX-    | CP1S3L4Ch5Na7ve1_Nargus_velox_JX313674_MERGED                    |
| -X-----XX-XXX        | CP1S3L4Ch5Pha7fra    | XXXXXXXXXXXXXXXX----- | CP1S3L4Ch5Pha7fra_Phacomorphus_fratylj_Staph.idba.18      | XXXXXXXXXXXXXXXX-----XXX | CP1S3L4Ch5Pha7fra_Phacomorphus_fratylj_Staph.idba.18_MERGED      |
| -X-----XX-X-X        | CP1S3L4Ch5Pt7ten     | XXXXXXXXXXXXXXXX----- | CP1S3L4Ch5Pt7ten_Ptomaphagus_tenuicornis_Soil.idba.24     | XXXXXXXXXXXXXXXX-----X-X | CP1S3L4Ch5Pt7ten_Ptomaphagus_tenuicornis_Soil.idba.24_MERGED     |
| -XX-----X-XX-XXX     | CP1S3L4Ch5Sc7wat     | XXXXXXXXXXXXXXXX----- | CP1S3L4Ch5Sc7wat_Sciodrepoides_watsoni_Staph.idba.6       | XXXXXXXXXXXXXXXX-----XXX | CP1S3L4Ch5Sc7wat_Sciodrepoides_watsoni_Staph.idba.6_MERGED       |
| -X-----X-XX-XXX      | CP1S3L4Ch5Tr7oro     | XXXXXXXXXXXXXXXX----- | CP1S3L4Ch5Tr7oro_Trapezodirus_orobios_Staph.idba.25       | XXXXXXXXXXXXXXXX-----X-X | CP1S3L4Ch5Tr7oro_Trapezodirus_orobios_Staph.idba.25_MERGED       |
| -XX-----XX-XXX       | CP1S3L4L5Ag7atr      | XXXXXXXXXXXXXXXX----- | CP1S3L4L5Ag7atr_Agathidium_atrum_BIUK.idba.3              | XXXXXXXXXXXXXXXX-----    | CP1S3L4L5Ag7atr_Agathidium_atrum_BIUK.idba.3_MERGED              |
| -XX-----XX-XXX       | CP1S3L4L5An7hum      | -XXXXXXXXXXXX-----    | CP1S3L4L5An7hum_Anisotoma_humeralis_amie.idba.93          | -XXXXXXXXXXXX-----XX-    | CP1S3L4L5An7hum_Anisotoma_humeralis_amie.idba.93_MERGED          |
| -X-----XX-XXX        | CP1S3L4L5Le7pic      | XXXXXX-----           | CP1S3L4L5Le7pic_Leiodes_picea_amie.idba.151               | XXXXXX-----              | CP1S3L4L5Le7pic_Leiodes_picea_amie.idba.151_MERGED               |
| -X-----XX-XXX        | CP1S3L4L5Tr7mae      | XXXXXXXXXXXXXXXX----- | CP1S3L4L5Tr7mae_Triarthron_maerkelii_amie.idba.15         | XXXXXXXXXXXXXXXX-----    | CP1S3L4L5Tr7mae_Triarthron_maerkelii_amie.idba.15_MERGED         |
| -XX-----XX-XXX       | CP1S3P4A5Ac7ins      | -XXXXXXXXXXXX-----    | CP1S3P4A5Ac7ins_Acrotrichis_insularis_BIUK.idba.28        | -XXXXXXXXXXXX-----       | CP1S3P4A5Ac7ins_Acrotrichis_insularis_BIUK.idba.28_MERGED        |

|              |                    |                       |                                                         |                  |                                                                |
|--------------|--------------------|-----------------------|---------------------------------------------------------|------------------|----------------------------------------------------------------|
| -XX- - - - - | CP1S3S4A5A6A17lan  | XXXXXXXXXXXXX         | CP1S3S4A5A6A17lan_Aleochara_lanuginosa_BIUk.idba.29     | XXXXXXXXXXXXX    | CP1S3S4A5A6A17lan_Aleochara_lanuginosa_BIUk.idba.29_MERGED     |
| -XX- - - - - | CP1S3S4A5A6A17ver  | -XXXXX- - - - -       | CP1S3S4A5A6A17ver_Aleochara_verna_Staph.idba.93         | -XXXXX- - - - -  | CP1S3S4A5A6A17ver_Aleochara_verna_Staph.idba.93_MERGED         |
| -X- - - - -  | CP1S3S4A5A6A7obf   | XXXX- - - - -         | CP1S3S4A5A6A7obf_Acrotona_obfuscata_Staph.idba.85       | XXXX- - - - -    | CP1S3S4A5A6A7obf_Acrotona_obfuscata_Staph.idba.85_MERGED       |
| -XX- - - - - | CP1S3S4A5A6A7cur   | XXXXXXXXXXXXX         | CP1S3S4A5A6A7cur_Alloconota_currax_Staph.idba.39        | XXXXXXXXXXXXX    | CP1S3S4A5A6A7cur_Alloconota_currax_Staph.idba.39_MERGED        |
| -XX- - - - - | CP1S3S4A5A6A7ana   | XX- - - - -           | CP1S3S4A5A6A7ana_Amischa_analis_Staph.idba.70           | XXXX- - - - -    | CP1S3S4A5A6A7ana_Amischa_analis_Staph.idba.70_MERGED           |
| -X- - - - -  | CP1S3S4A5A6A7ami   | XXXXXXXXXXXXX         | CP1S3S4A5A6A7ami_Atheta_amicula_Staph.idba.42           | XXXXXXXXXXXXX    | CP1S3S4A5A6A7ami_Atheta_amicula_Staph.idba.42_MERGED           |
| -XX- - - - - | CP1S3S4A5A6A7cas   | XXXXXXXXXXXXX         | CP1S3S4A5A6A7cas_Atheta_castanoptera_BIUk.idba.6        | XXXXXXXXXXXXX    | CP1S3S4A5A6A7cas_Atheta_castanoptera_BIUk.idba.6_MERGED        |
| -XX- - - - - | CP1S3S4A5A6A7fun   | XXXXXXXXXXXXX         | CP1S3S4A5A6A7fun_Atheta_fungi_Soil.idba.12              | XXXXXXXXXXXXX    | CP1S3S4A5A6A7fun_Atheta_fungi_Soil.idba.12_MERGED              |
| -X- - - - -  | CP1S3S4A5A6A7fung  | XXXXXXXXXXXXX         | CP1S3S4A5A6A7fung_Atheta_fungivora_Staph.idba.37        | XXXXXXXXXXXXX    | CP1S3S4A5A6A7fung_Atheta_fungivora_Staph.idba.37_MERGED        |
| -XX- - - - - | CP1S3S4A5A6A7gag   | XXXXXXXXXXXXX         | CP1S3S4A5A6A7gag_Atheta_gagatina_Staph.idba.20          | XXXXXXXXXXXXX    | CP1S3S4A5A6A7gag_Atheta_gagatina_Staph.idba.20_MERGED          |
| -XX- - - - - | CP1S3S4A5A6A7hyp   | XXXXXXXXXXXXX         | CP1S3S4A5A6A7hyp_Atheta_hypnorum_BIUk.idba.4            | XXXXXXXXXXXXX    | CP1S3S4A5A6A7hyp_Atheta_hypnorum_BIUk.idba.4_MERGED            |
| -XX- - - - - | CP1S3S4A5A6A7vol   | -XXXXXXXXXXXXX        | CP1S3S4A5A6A7vol_Atheta_volans_Staph.idba.63            | -XXXXXXXXXXXXX   | CP1S3S4A5A6A7vol_Atheta_volans_Staph.idba.63_MERGED            |
| -XX- - - - - | CP1S3S4A5A6Ca7obs  | XXXXXXXXXXXXX         | CP1S3S4A5A6Ca7obs_Callicerus_obscurus_Staph.idba.39     | XXXXXXXXXXXXX    | CP1S3S4A5A6Ca7obs_Callicerus_obscurus_Staph.idba.39_MERGED     |
| -XX- - - - - | CP1S3S4A5A6Ge7cir  | XXXXXXXXXXXXX         | CP1S3S4A5A6Ge7cir_Geostiba_circellaris_BIUk.idba.25     | XXXXXXXXXXXXX    | CP1S3S4A5A6Ge7cir_Geostiba_circellaris_BIUk.idba.25_MERGED     |
| -XX- - - - - | CP1S3S4A5A6Li7mic  | XXXXXXXXXXXXX         | CP1S3S4A5A6Li7mic_Lioglutula_longiuscula_BIUk.idba.24   | XXXXXXXXXXXXX    | CP1S3S4A5A6Li7mic_Lioglutula_longiuscula_BIUk.idba.24_MERGED   |
| -XX- - - - - | CP1S3S4A5A6Mo7fun  | -XXXXX- - - - -       | CP1S3S4A5A6Mo7fun_Mocyta_fungi_BIUk.idba.80             | -XXXXX- - - - -  | CP1S3S4A5A6Mo7fun_Mocyta_fungi_BIUk.idba.80_MERGED             |
| -XX- - - - - | CP1S3S4A5B6Eu7opt  | XXXXXXXXXXXXX         | CP1S3S4A5B6Eu7opt_Euryusa_optabilis_Staph.idba.22       | XXXXXXXXXXXXX    | CP1S3S4A5B6Eu7opt_Euryusa_optabilis_Staph.idba.22_MERGED       |
| -XX- - - - - | CP1S3S4A5Lo6Lo7pub | XXXXXXXXXXXXX         | CP1S3S4A5Lo6Lo7pub_Lomechusa_publicollis_Soil.idba.4    | XXXXXXXXXXXXX    | CP1S3S4A5Lo6Lo7pub_Lomechusa_publicollis_Soil.idba.4_MERGED    |
| -XX- - - - - | CP1S3S4A5O6Cr7sut  | -XXXXXXXXXXXXX        | CP1S3S4A5O6Cr7sut_Crataraea_suturalis_Staph.idba.50     | -XXXXXXXXXXXXX   | CP1S3S4A5O6Cr7sut_Crataraea_suturalis_Staph.idba.50_MERGED     |
| -XX- - - - - | CP1S3S4A5O6De7cor  | XXXXXXXXXXXXX         | CP1S3S4A5O6De7cor_Dexiogyia_corticina_Staph.idba.34     | XXXXXXXXXXXXX    | CP1S3S4A5O6De7cor_Dexiogyia_corticina_Staph.idba.34_MERGED     |
| -XX- - - - - | CP1S3S4A5O6Ox7acu  | XXXXXXXXXXXXX         | CP1S3S4A5O6Ox7acu_Oxypoda_acuminata_BIUk.idba.20        | XXXXXXXXXXXXX    | CP1S3S4A5O6Ox7acu_Oxypoda_acuminata_BIUk.idba.20_MERGED        |
| -X- - - - -  | CP1S3S4A5O6Ox7bre  | XXXXXXXXXXXXX         | CP1S3S4A5O6Ox7bre_Oxypoda_brevicornis_BIUk.idba.22      | XXXXXXXXXXXXX    | CP1S3S4A5O6Ox7bre_Oxypoda_brevicornis_BIUk.idba.22_MERGED      |
| -XX- - - - - | CP1S3S4A5O6Ox7lon  | XXXXXXXXXXXXX         | CP1S3S4A5O6Ox7lon_Oxypoda_longipes_Staph.idba.36        | XXXXXXXXXXXXX    | CP1S3S4A5O6Ox7lon_Oxypoda_longipes_Staph.idba.36_MERGED        |
| -XX- - - - - | CP1S3S4A5O6Ox7opa  | X-XXXXXX-XXXX         | CP1S3S4A5O6Ox7opa_Oxypoda_opaca_JX412751                | XXXXXXXXXX-XXXX  | CP1S3S4A5O6Ox7opa_Oxypoda_opaca_JX412751_MERGED                |
| -XX- - - - - | CP1S3S4A5O6Par7lon | -XXXXXXXXXXXXX        | CP1S3S4A5O6Par7lon_Parocycusa_longitarsis_JX313678      | -XXXXXXXXXXXXX   | CP1S3S4A5O6Par7lon_Parocycusa_longitarsis_JX313678_MERGED      |
| -XX- - - - - | CP1S3S4A5O6Ph7tes  | -XXXXXX- - - - -      | CP1S3S4A5O6Ph7tes_Phloeopora_testacea_Staph.idba.81     | -XXXXXX- - - - - | CP1S3S4A5O6Ph7tes_Phloeopora_testacea_Staph.idba.81_MERGED     |
| -XX- - - - - | CP1S3S4A5T6Da7fal  | XXXXXXXXXXXXX         | CP1S3S4A5T6Da7fal_Dacrila_fallax_Staph.idba.43          | XXXXXXXXXXXXX    | CP1S3S4A5T6Da7fal_Dacrila_fallax_Staph.idba.43_MERGED          |
| -XX- - - - - | CP1S3S4A5T6Th7atr  | XXXXXXXXXXXXX         | CP1S3S4A5T6Th7atr_Thinonoma_atra_Staph.idba.40          | XXXXXXXXXXXXX    | CP1S3S4A5T6Th7atr_Thinonoma_atra_Staph.idba.40_MERGED          |
| -XX- - - - - | CP1S3S4Eu5Eu7ruf   | XXXXXXXXXXXXX         | CP1S3S4Eu5Eu7ruf_Euaesthetus_ruficapillus_Staph.idba.45 | XXXXXXXXXXXXX    | CP1S3S4Eu5Eu7ruf_Euaesthetus_ruficapillus_Staph.idba.45_MERGED |
| -XX- - - - - | CP1S3S4H5Ha7cap    | XXXXXXXXXXXXX         | CP1S3S4H5Ha7cap_Habrocerus_capillaricornis_JX412795     | XXXXXXXXXXXXX    | CP1S3S4H5Ha7cap_Habrocerus_capillaricornis_JX412795_MERGED     |
| -XX- - - - - | CP1S3S4O5An7atr    | XXXXXX- - - - -       | CP1S3S4O5An7atr_Anthobium_atrocephalum_BIUk.idba.67     | XXXXXX- - - - -  | CP1S3S4O5An7atr_Anthobium_atrocephalum_BIUk.idba.67_MERGED     |
| -X- - - - -  | CP1S3S4O5An7mel    | XXXXXXXXXXXXX         | CP1S3S4O5An7mel_Anthobium_melanocephalum_ameie.idba.2   | XXXXXXXXXXXXX    | CP1S3S4O5An7mel_Anthobium_melanocephalum_ameie.idba.2_MERGED   |
| -X- - - - -  | CP1S3S4O5Eu7tor    | XXXXXXXXXXXXX         | CP1S3S4O5Eu7tor_Euspalerum_torquatum_Staph.idba.31      | XXXXXXXXXXXXX    | CP1S3S4O5Eu7tor_Euspalerum_torquatum_Staph.idba.31_MERGED      |
| -XX- - - - - | CP1S3S4O5Ne7bru    | XXXXXXXXXXXXX         | CP1S3S4O5Ne7bru_Neophonus_bruchi_Staph.idba.0           | XXXXXXXXXXXXX    | CP1S3S4O5Ne7bru_Neophonus_bruchi_Staph.idba.0_MERGED           |
| -X- - - - -  | CP1S3S4O5O17pic    | XXXXXXXXXXXXX         | CP1S3S4O5O17pic_Olophrum_piceum_Staph.idba.35           | XXXXXXXXXXXXX    | CP1S3S4O5O17pic_Olophrum_piceum_Staph.idba.35_MERGED           |
| -XX- - - - - | CP1S3S4O5Om7riv    | -XXXXXXXXXXXXX        | CP1S3S4O5Om7riv_Omalium_rivulare_JX412759               | -XXXXXXXXXXXXX   | CP1S3S4O5Om7riv_Omalium_rivulare_JX412759_MERGED               |
| -XX- - - - - | CP1S3S4O5Om7rug    | XXXXXXXXXXXXX         | CP1S3S4O5Om7rug_Omalium_rugatum_BIUk.idba.7             | XXXXXXXXXXXXX    | CP1S3S4O5Om7rug_Omalium_rugatum_BIUk.idba.7_MERGED             |
| -X- - - - -  | CP1S3S4Ox5An7mut   | -XXXXXXXXXXXXX        | CP1S3S4Ox5An7mut_Anotylus_mutator_BIUk.idba.48          | -XXXXXXXXXXXXX   | CP1S3S4Ox5An7mut_Anotylus_mutator_BIUk.idba.48_MERGED          |
| -XX- - - - - | CP1S3S4Ox5An7scu   | -XXXXXX- - - - -      | CP1S3S4Ox5An7scu_Anotylus_sculpturatus_Staph.idba.76    | -XXXXXX- - - - - | CP1S3S4Ox5An7scu_Anotylus_sculpturatus_Staph.idba.76_MERGED    |
| -X- - - - -  | CP1S3S4Ox5Ca7ful   | X-XXXXXXXXXX- - - - - | CP1S3S4Ox5Ca7ful_Carpelimus_fuliginosus_ameie.idba.60   | XXXXXXXXXXXXX    | CP1S3S4Ox5Ca7ful_Carpelimus_fuliginosus_ameie.idba.60_MERGED   |
| -XX- - - - - | CP1S3S4Ox5Ox7pic   | XXXXXXXXXXXXX         | CP1S3S4Ox5Ox7pic_Oxytelus_piceus_ameie.idba.86          | XXXXXXXXXXXXX    | CP1S3S4Ox5Ox7pic_Oxytelus_piceus_ameie.idba.86_MERGED          |
| -X- - - - -  | CP1S3S4P5A7lyo     | XXXXXXXXXXXXX         | CP1S3S4P5A7lyo_Astenus_lyonessius_Staph.idba.17         | XXXXXXXXXXXXX    | CP1S3S4P5A7lyo_Astenus_lyonessius_Staph.idba.17_MERGED         |
| -X- - - - -  | CP1S3S4P5Hy7deb    | -XXXXXXXXXXXXX        | CP1S3S4P5Hy7deb_Hypomedon_debilocornis_JX313672         | -XXXXXXXXXXXXX   | CP1S3S4P5Hy7deb_Hypomedon_debilocornis_JX313672_MERGED         |
| -XX- - - - - | CP1S3S4P5La7bru    | XXXXXXXXXXXXX         | CP1S3S4P5La7bru_Lathrobium_brunnipes_Staph.idba.10      | XXXXXXXXXXXXX    | CP1S3S4P5La7bru_Lathrobium_brunnipes_Staph.idba.10_MERGED      |
| -XX- - - - - | CP1S3S4P5La7ful    | XXXXXX- - - - -       | CP1S3S4P5La7ful_Lathrobium_fulvipenne_BIUk.idba.70      | XXXXXX- - - - -  | CP1S3S4P5La7ful_Lathrobium_fulvipenne_BIUk.idba.70_MERGED      |
| -XX- - - - - | CP1S3S4P5Me7api    | XXXXXXXXXXXXX         | CP1S3S4P5Me7api_Medon_apicalis_Staph.idba.9             | XXXXXXXXXXXXX    | CP1S3S4P5Me7api_Medon_apicalis_Staph.idba.9_MERGED             |
| -X- - - - -  | CP1S3S4P5Me7pic    | XXXXXXXXXXXXX         | CP1S3S4P5Me7pic_Medon_piceus_ameie.idba.112             | XXXXXXXXXXXXX    | CP1S3S4P5Me7pic_Medon_piceus_ameie.idba.112_MERGED             |
| -XX- - - - - | CP1S3S4P5Ru7gen    | XXXXXXXXXXXXX         | CP1S3S4P5Ru7gen_Rugilus_geniculatus_Staph.idba.38       | XXXXXXXXXXXXX    | CP1S3S4P5Ru7gen_Rugilus_geniculatus_Staph.idba.38_MERGED       |
| -X- - - - -  | CP1S3S4P5Su7mel    | XXXXXXXXXXXXX         | CP1S3S4P5Su7mel_Sunius_melanocephalus_Staph.idba.61     | XXXXXXXXXXXXX    | CP1S3S4P5Su7mel_Sunius_melanocephalus_Staph.idba.61_MERGED     |
| -XX- - - - - | CP1S3S4P5Te7ter    | XXXXXXXXXXXXX         | CP1S3S4P5Te7ter_Tetartopeus_terminatus_Staph.idba.27    | XXXXXXXXXXXXX    | CP1S3S4P5Te7ter_Tetartopeus_terminatus_Staph.idba.27_MERGED    |
| -XX- - - - - | CP1S3S4Ps5Bra7fos  | XXXXXXXXXXXXX         | CP1S3S4Ps5Bra7fos_Brachygluta_fossulata_BIUk.idba.21    | XXXXXXXXXXXXX    | CP1S3S4Ps5Bra7fos_Brachygluta_fossulata_BIUk.idba.21_MERGED    |
| -XX- - - - - | CP1S3S4Ps5Bra7hel  | XXXXXX- - - - -       | CP1S3S4Ps5Bra7hel_Brachygluta_helferi_Staph.idba.82     | XXXXXX- - - - -  | CP1S3S4Ps5Bra7hel_Brachygluta_helferi_Staph.idba.82_MERGED     |
| -X- - - - -  | CP1S3S4Ps5Ct7pic   | XXXXX- - - - -        | CP1S3S4Ps5Ct7pic_Ctenisodes_piceus_Staph.idba.88        | XXXXX- - - - -   | CP1S3S4Ps5Ct7pic_Ctenisodes_piceus_Staph.idba.88_MERGED        |
| -XX- - - - - | CP1S3S4Ps5Eu7pic   | -XXXXXXXXXXXXX        | CP1S3S4Ps5Eu7pic_Euplectus_piceus_BIUk.idba.53          | -XXXXXXXXXXXXX   | CP1S3S4Ps5Eu7pic_Euplectus_piceus_BIUk.idba.53_MERGED          |
| -XX- - - - - | CP1S3S4Ps5Ty7nig   | XXXXXXXXXXXXX         | CP1S3S4Ps5Ty7nig_Tychus_niger_BIUk.idba.17              | XXXXXXXXXXXXX    | CP1S3S4Ps5Ty7nig_Tychus_niger_BIUk.idba.17_MERGED              |



|                   |                      |              |                                                           |                |                                                                  |
|-------------------|----------------------|--------------|-----------------------------------------------------------|----------------|------------------------------------------------------------------|
| --X-----          | CP1S3S4Q5Qu7nem      | XXXXXXXXXXXX | CP1S3S4Q5Qu7nem_Quedius_nemoralis_BIUK.idba.5             | XXXXXXXXXXXX   | CP1S3S4Q5Qu7nem_Quedius_nemoralis_BIUK.idba.5_MERGED             |
| --X-----XX-       | CP1S3S4S5Br7lat      | --XXXXXXXX-- | CP1S3S4S5Br7lat_Brachynopus_latus_JX412745                | --XXXXXXXX--   | CP1S3S4S5Br7lat_Brachynopus_latus_JX412745_MERGED                |
| -XX-----XX-XXX    | CP1S3S4S5Sc7qua      | XXXXXXXXXXXX | CP1S3S4S5Sc7qua_Scaphidium_quadrimaculatum_Staph.idba.5   | XXXXXXXXXXXX   | CP1S3S4S5Sc7qua_Scaphidium_quadrimaculatum_Staph.idba.5_MERGED   |
| -X-----           | CP1S3S4S5Sca7bol     | XXXXXXXXXXXX | CP1S3S4S5Sca7bol_Scaphisoma_boleti_Staph.idba.55          | XXXXXXXXXXXX   | CP1S3S4S5Sca7bol_Scaphisoma_boleti_Staph.idba.55_MERGED          |
| -XX-----X-----    | CP1S3S4St5St7cla     | XXXXXXXXXXXX | CP1S3S4St5St7cla_Stenus_clavicornis_2VGB.idba.1           | XXXXXXXXXXXX   | CP1S3S4St5St7cla_Stenus_clavicornis_2VGB.idba.1_MERGED           |
| -XX-----X-----    | CP1S3S4St5St7com     | XXXXXXXXXXXX | CP1S3S4St5St7com_Stenus_comma_Staph.idba.58               | XXXXXXXXXXXX   | CP1S3S4St5St7com_Stenus_comma_Staph.idba.58_MERGED               |
| -XX-----XX-       | CP1S3S4Sta506At7aff  | XXXXXXXXXXXX | CP1S3S4Sta506At7aff_Atreucus_affinis_Staph.idba.41        | XXXXXXXXXXXX   | CP1S3S4Sta506At7aff_Atreucus_affinis_Staph.idba.41_MERGED        |
| -XX-----          | CP1S3S4Sta5060t7lae  | XXXXXX       | CP1S3S4Sta5060t7lae_Othius_laeviusculus_amei.idba.150     | XXXXXX         | CP1S3S4Sta5060t7lae_Othius_laeviusculus_amei.idba.150_MERGED     |
| -XX-----          | CP1S3S4Sta5060t7pun  | XXXXXX       | CP1S3S4Sta5060t7pun_Othius_punctulatus_Soil.idba.158      | XXXXXX         | CP1S3S4Sta5060t7pun_Othius_punctulatus_Soil.idba.158_MERGED      |
| -XX-----          | CP1S3S4Sta5P6Ga7pil  | XXXXXXXXXXXX | CP1S3S4Sta5P6Ga7pil_Gabrius_piliger_Staph.idba.12         | XXXXXXXXXXXX   | CP1S3S4Sta5P6Ga7pil_Gabrius_piliger_Staph.idba.12_MERGED         |
| -XX-----          | CP1S3S4Sta5S6B17sor  | XXXXXXXXXXXX | CP1S3S4Sta5S6B17sor_Bisnius_sordidus_Staph.idba.16        | XXXXXXXXXXXX   | CP1S3S4Sta5S6B17sor_Bisnius_sordidus_Staph.idba.16_MERGED        |
| -X-----           | CP1S3S4Sta5S6Gab7the | XXXXXXXXXXXX | CP1S3S4Sta5S6Gab7the_Gabronthus_thermarum_Staph.idba.53   | XXXXXXXXXXXX   | CP1S3S4Sta5S6Gab7the_Gabronthus_thermarum_Staph.idba.53_MERGED   |
| -----XX-          | CP1S3S4Sta5S6Ne7vil  | XXXXXXXXXXXX | CP1S3S4Sta5S6Ne7vil_Neobisnius_villosulus_Staph.idba.1    | XXXXXXXXXXXX   | CP1S3S4Sta5S6Ne7vil_Neobisnius_villosulus_Staph.idba.1_MERGED    |
| -XX-----          | CP1S3S4Sta5S6Oc7aet  | XXXXXXXXXXXX | CP1S3S4Sta5S6Oc7aet_Ocypus_aethiops_Soil.idba.34          | XXXXXXXXXXXX   | CP1S3S4Sta5S6Oc7aet_Ocypus_aethiops_Soil.idba.34_MERGED          |
| -X-----           | CP1S3S4Sta5S6Oc7bru  | XXXXXXXXXXXX | CP1S3S4Sta5S6Oc7bru_Ocypus_brunnipes_Staph.idba.56        | XXXXXXXXXXXX   | CP1S3S4Sta5S6Oc7bru_Ocypus_brunnipes_Staph.idba.56_MERGED        |
| -XX-----          | CP1S3S4Sta5S6Oc7ole  | XXXXXXXXXXXX | CP1S3S4Sta5S6Oc7ole_Ocypus_olens_2VGB.idba.7              | XXXXXXXXXXXX   | CP1S3S4Sta5S6Oc7ole_Ocypus_olens_2VGB.idba.7_MERGED              |
| -XX-----XX-       | CP1S3S4Sta5S6Oc7oph  | XXXXXXXXXXXX | CP1S3S4Sta5S6Oc7oph_Ocypus_ophthalmicus_amei.idba.21      | XXXXXXXXXXXX   | CP1S3S4Sta5S6Oc7oph_Ocypus_ophthalmicus_amei.idba.21_MERGED      |
| -XX-----XX-       | CP1S3S4Sta5S6On7tes  | XXXXXXXXXXXX | CP1S3S4Sta5S6On7tes_Ontholestes_tessellatus_amei.idba.69  | XXXXXXXXXXXX   | CP1S3S4Sta5S6On7tes_Ontholestes_tessellatus_amei.idba.69_MERGED  |
| -XX-----XX-       | CP1S3S4Sta5S6Ph7fim  | XXXXXXXXXXXX | CP1S3S4Sta5S6Ph7fim_Philonthus_fimeticus_Staph.idba.11    | XXXXXXXXXXXX   | CP1S3S4Sta5S6Ph7fim_Philonthus_fimeticus_Staph.idba.11_MERGED    |
| -X-----           | CP1S3S4Sta5S6Ta7mor  | XXXXXXXXXXXX | CP1S3S4Sta5S6Ta7mor_Tasgius_morsitans_Staph.idba.32       | XXXXXXXXXXXX   | CP1S3S4Sta5S6Ta7mor_Tasgius_morsitans_Staph.idba.32_MERGED       |
| -XX-----          | CP1S3S4Sta5X6Gy7fra  | XXXXXXXXXXXX | CP1S3S4Sta5X6Gy7fra_Gyrohypnus_fracticornis_Staph.idba.29 | XXXXXXXXXXXX   | CP1S3S4Sta5X6Gy7fra_Gyrohypnus_fracticornis_Staph.idba.29_MERGED |
| -XX-----XX-       | CP1S3S4Sta5X6Nu7len  | XXXXXX       | CP1S3S4Sta5X6Nu7len_Nudobius_lentus_Staph.idba.72         | XXXXXX         | CP1S3S4Sta5X6Nu7len_Nudobius_lentus_Staph.idba.72_MERGED         |
| -X-----           | CP1S3S4T5Bo7cas      | XXXXXXXXXXXX | CP1S3S4T5Bo7cas_Bolitobius_castaneus_BIUK.idba.14         | XXXXXXXXXXXX   | CP1S3S4T5Bo7cas_Bolitobius_castaneus_BIUK.idba.14_MERGED         |
| -X-----           | CP1S3S4T5Lo7exo      | XXXXXXXXXXXX | CP1S3S4T5Lo7exo_Lordithon_exoletus_amei.idba.7            | XXXXXXXXXXXX   | CP1S3S4T5Lo7exo_Lordithon_exoletus_amei.idba.7_MERGED            |
| -X-----XX-        | CP1S3S4T5Se7bip      | XXXXXXXXXXXX | CP1S3S4T5Se7bip_Sepedophilus_bipunctatus_Staph.idba.23    | XXXXXXXXXXXX   | CP1S3S4T5Se7bip_Sepedophilus_bipunctatus_Staph.idba.23_MERGED    |
| -XX-----          | CP1S3S4T5Ta7chr      | XXXXXXXXXXXX | CP1S3S4T5Ta7chr_Tachyporus_chrysomelinus_Soil.idba.10     | XXXXXXXXXXXX   | CP1S3S4T5Ta7chr_Tachyporus_chrysomelinus_Soil.idba.10_MERGED     |
| -X-----           | CP1S3S4T5Tac7lat     | XXXXXXXXXXXX | CP1S3S4T5Tac7lat_Tachinus_laticollis_BIUK.idba.8          | XXXXXXXXXXXX   | CP1S3S4T5Tac7lat_Tachinus_laticollis_BIUK.idba.8_MERGED          |
| -XX-----          | CP1S3S4T5Tac7sub     | XXXXXXXXXXXX | CP1S3S4T5Tac7sub_Tachinus_subterraneus_amei.idba.1        | XXXXXXXXXXXX   | CP1S3S4T5Tac7sub_Tachinus_subterraneus_amei.idba.1_MERGED        |
| -XX-----XX-       | CP1S3Sc4Ce7gal       | XXXXXX       | CP1S3Sc4Ce7gal_Cephennium_gallicum_BIUK.idba.66           | XXXXXX         | CP1S3Sc4Ce7gal_Cephennium_gallicum_BIUK.idba.66_MERGED           |
| XXXXXXXXXXXX--X   | CP1S3S14S5Ne7ame     | XXXXXXXXXXXX | CP1S3S14S5Ne7ame_Necrophila_americae_NC_018352            | XXXXXXXXXXXX   | CP1S3S14S5Ne7ame_Necrophila_americae_NC_018352_MERGED            |
| -X-----           | CP1S3S14S5Si7tyr     | XXXXXXXXXXXX | CP1S3S14S5Si7tyr_Silpha_tyrolensis_amei.idba.102          | XXXXXXXXXXXX   | CP1S3S14S5Si7tyr_Silpha_tyrolensis_amei.idba.102_MERGED          |
| -XX-----XX-XX-    | CP1Sc3Ge4An7ste      | --XXXXXXXX-- | CP1Sc3Ge4An7ste_Anoplotrupes_stercorosus_JX412838         | --XXXXXXXX--   | CP1Sc3Ge4An7ste_Anoplotrupes_stercorosus_JX412838_MERGED         |
| -XX-----XX-       | CP1Sc3L4Lu5Do7par    | XXXXXX       | CP1Sc3L4Lu5Do7par_Dorcus_parallepipedus_2VGB.idba.16      | XXXXXX         | CP1Sc3L4Lu5Do7par_Dorcus_parallepipedus_2VGB.idba.16_MERGED      |
| -XX-----          | CP1Sc3L4Lu5Lu7cer    | XXXXXXXXXXXX | CP1Sc3L4Lu5Lu7cer_Lucanus_cervus_2VGB.idba.13             | XXXXXXXXXXXX   | CP1Sc3L4Lu5Lu7cer_Lucanus_cervus_2VGB.idba.13_MERGED             |
| XXXXXXXXXXXX--X   | CP1Sc3L4Lu5Lu7maz    | XXXXXXXXXXXX | CP1Sc3L4Lu5Lu7maz_Lucanus_mazama_NC_013578                | XXXXXXXXXXXX   | CP1Sc3L4Lu5Lu7maz_Lucanus_mazama_NC_013578_MERGED                |
| -X-----X---X      | CP1Sc3L4S5Ce7chr     | XXXXXXXXXXXX | CP1Sc3L4S5Ce7chr_Ceruchus_chrysomelinus_amei.idba.108     | XXXXXXXXXXXX   | CP1Sc3L4S5Ce7chr_Ceruchus_chrysomelinus_amei.idba.108_MERGED     |
| --XX-----         | CP1Sc3S4A5Ap7ele     | XXXXXXXXXXXX | CP1Sc3S4A5Ap7ele_Aphodius_elevatus_Soil.idba.32           | XXXXXXXXXXXX   | CP1Sc3S4A5Ap7ele_Aphodius_elevatus_Soil.idba.32_MERGED           |
| -XX-----          | CP1Sc3S4A5Ap7foe     | -----XXXX--  | CP1Sc3S4A5Ap7foe_Aphodius_foetens_amei.idba.115           | -XX-XXXXXX-    | CP1Sc3S4A5Ap7foe_Aphodius_foetens_amei.idba.115_MERGED           |
| -XX-----          | CP1Sc3S4A5Ap7mer     | XXXXXXXXXXXX | CP1Sc3S4A5Ap7mer_Aphodius_merdarius_Soil.idba.93          | XXXXXXXXXXXX   | CP1Sc3S4A5Ap7mer_Aphodius_merdarius_Soil.idba.93_MERGED          |
| -XX-----X---XXX   | CP1Sc3S4A5Ox7syl     | XXXXXXXXXXXX | CP1Sc3S4A5Ox7syl_Oxyomus_sylvestris_amei.idba.121         | XXXXXXXXXXXX   | CP1Sc3S4A5Ox7syl_Oxyomus_sylvestris_amei.idba.121_MERGED         |
| -XX-----X         | CP1Sc3S4A5Ple7cae    | XXXXXXXXXXXX | CP1Sc3S4A5Ple7cae_Pleurophorus_caesus_Soil.idba.33        | XXXXXXXXXXXX   | CP1Sc3S4A5Ple7cae_Pleurophorus_caesus_Soil.idba.33_MERGED        |
| -X-----XX---X     | CP1Sc3S4D5Cyp7val    | XXXXXXXXXXXX | CP1Sc3S4D5Cyp7val_Cyphonistes_vallatus_JX412731           | XXXXXXXXXXXX   | CP1Sc3S4D5Cyp7val_Cyphonistes_vallatus_JX412731_MERGED           |
| XXXXXXXXXX-X-X-X  | CP1Sc3S4M5Chei7jan   | XXXXXXXXXXXX | CP1Sc3S4M5Chei7jan_Cheirotonus_jansoni_NC_023246          | XXXXXXXXXXXX   | CP1Sc3S4M5Chei7jan_Cheirotonus_jansoni_NC_023246_MERGED          |
| -XX-----          | CP1Sc3S4M5Me7hip     | XXXXXXXXXXXX | CP1Sc3S4M5Me7hip_Melolontha_hippocastani_amei.idba.79     | XXXXXXXXXXXX   | CP1Sc3S4M5Me7hip_Melolontha_hippocastani_amei.idba.79_MERGED     |
| XXXXXXXXXXXX--X   | CP1Sc3S4M5Rh7mag     | XXXXXXXXXXXX | CP1Sc3S4M5Rh7mag_Rhopaea_magnicornis_NC_013252            | XXXXXXXXXXXX   | CP1Sc3S4M5Rh7mag_Rhopaea_magnicornis_NC_013252_MERGED            |
| -XX-----XX-XXX    | CP1Sc3S4R5Ph7hor     | --XXXX--     | CP1Sc3S4R5Ph7hor_Phyllopertha_horticola_amei.idba.189     | XXXXXX--XX-XXX | CP1Sc3S4R5Ph7hor_Phyllopertha_horticola_amei.idba.189_MERGED     |
| -XX-----X---X     | CP1Sc3S4S5Bu7bis     | XXXXXXXXXXXX | CP1Sc3S4S5Bu7bis_Bubas_bison_CS.idba.2                    | XXXXXXXXXXXX   | CP1Sc3S4S5Bu7bis_Bubas_bison_CS.idba.2_MERGED                    |
| --XX-----X---X    | CP1Sc3S4S5Bu7bub     | XXXXXXXXXXXX | CP1Sc3S4S5Bu7bub_Bubas_bubalus_CS.idba.14                 | XXXXXXXXXXXX   | CP1Sc3S4S5Bu7bub_Bubas_bubalus_CS.idba.14_MERGED                 |
| -----X-----       | CP1Sc3S4S5C6Ca7aeq   | XXXXXX       | CP1Sc3S4S5C6Ca7aeq_Canthon_aequinoctialis_Panama.idba.243 | XXXXXX         | CP1Sc3S4S5C6Ca7aeq_Canthon_aequinoctialis_Panama.idba.243_MERGED |
| -X-----X---XXX    | CP1Sc3S4S5Ca7bin     | XXXXXXXXXXXX | CP1Sc3S4S5Ca7bin_Caccobius_binodulus_CS.idba.46           | XXXXXXXXXXXX   | CP1Sc3S4S5Ca7bin_Caccobius_binodulus_CS.idba.46_MERGED           |
| -X-----X---X      | CP1Sc3S4S5Ca7nig     | XXXXXXXXXXXX | CP1Sc3S4S5Ca7nig_Caccobius_nigriritulus_CS.idba.25        | XXXXXXXXXXXX   | CP1Sc3S4S5Ca7nig_Caccobius_nigriritulus_CS.idba.25_MERGED        |
| -X-----X---XXX    | CP1Sc3S4S5Cl7con     | XXXXXX       | CP1Sc3S4S5Cl7con_Cleptocaccobius_convexifrons_CS.idba.80  | XXXXXX         | CP1Sc3S4S5Cl7con_Cleptocaccobius_convexifrons_CS.idba.80_MERGED  |
| -----X---XXX      | CP1Sc3S4S5Dig7dia    | XXXXXXXXXXXX | CP1Sc3S4S5Dig7dia_Onthophagus_diabolicus_Scarab.idba.18   | XXXXXXXXXXXX   | CP1Sc3S4S5Dig7dia_Onthophagus_diabolicus_Scarab.idba.18_MERGED   |
| -XXX-----X-XX---X | CP1Sc3S4S5Dig7gaz    | XXXXXXXXXXXX | CP1Sc3S4S5Dig7gaz_Digitonthophagus_gazella_Scarab.idba.8  | XXXXXXXXXXXX   | CP1Sc3S4S5Dig7gaz_Digitonthophagus_gazella_Scarab.idba.8_MERGED  |
| -X-----X---X      | CP1Sc3S4S5Dr7kir     | XXXXXXXXXXXX | CP1Sc3S4S5Dr7kir_Drepanocerus_kirbyi_CS.idba.15           | XXXXXXXXXXXX   | CP1Sc3S4S5Dr7kir_Drepanocerus_kirbyi_CS.idba.15_MERGED           |

|                   |                     |                    |                                                                 |                     |                                                                       |
|-------------------|---------------------|--------------------|-----------------------------------------------------------------|---------------------|-----------------------------------------------------------------------|
| --X-----X----     | CP1Sc3S4S5Eu6Eu7car | XXXXXXXXXXXXX----  | CP1Sc3S4S5Eu6Eu7car_Cheironitis_hoplosternus_Scarab.idba.15     | XXXXXXXXXXXXX----   | CP1Sc3S4S5Eu6Eu7car_Cheironitis_hoplosternus_Scarab.idba.15_MERGED    |
| --X-----X----     | CP1Sc3S4S5Eu6Eu7foe | XXXXXXXXXXXXX----  | CP1Sc3S4S5Eu6Eu7foe_Eurysternus_foedus_Scarab.idba.1            | XXXXXXXXXXXXX----   | CP1Sc3S4S5Eu6Eu7foe_Eurysternus_foedus_Scarab.idba.1_MERGED           |
| --X-----X----     | CP1Sc3S4S5Eu6Eu7ham | XXXXXXXXXXXXX----  | CP1Sc3S4S5Eu6Eu7ham_Eurysternus_hamaticollis_CS.idba.53         | XXXXXXXXXXXXX----   | CP1Sc3S4S5Eu6Eu7ham_Eurysternus_hamaticollis_CS.idba.53_MERGED        |
| --X-----X----     | CP1Sc3S4S5Eu6Eu7inf | XXXXXXXXXXXXX----  | CP1Sc3S4S5Eu6Eu7inf_Eurysternus_inflexus_CS.idba.17             | XXXXXXXXXXXXX----   | CP1Sc3S4S5Eu6Eu7inf_Eurysternus_inflexus_CS.idba.17_MERGED            |
| -XX-----X----     | CP1Sc3S4S5Eu7ful    | XXXXXXXXXXXXX----  | CP1Sc3S4S5Eu7ful_Euoniticellus_fulvus_Scarab.idba.0             | XXXXXXXXXXXXX-XX    | CP1Sc3S4S5Eu7ful_Euoniticellus_fulvus_Scarab.idba.0_MERGED            |
| -XX-----X----     | CP1Sc3S4S5Eu7int    | XXXXXXXXXXXXX----  | CP1Sc3S4S5Eu7int_Euoniticellus_intermedius_CS.idba.5            | XXXXXXXXXXXXX-XX    | CP1Sc3S4S5Eu7int_Euoniticellus_intermedius_CS.idba.5_MERGED           |
| --X-----X----     | CP1Sc3S4S5Euon7car  | -XXXXXXXXXXXXX---- | CP1Sc3S4S5Euon7car_Onthophagus_carbonarius_Scarab.idba.19       | -XXXXXXXXXXXXX-XX   | CP1Sc3S4S5Euon7car_Onthophagus_carbonarius_Scarab.idba.19_MERGED      |
| --X-----X-XX-XXX  | CP1Sc3S4S5Hel7qua   | XXXX-----          | CP1Sc3S4S5Hel7qua_Helictopleurus_quadripunctatus_CS.idba.79     | XXXX-----X-XX-XXX   | CP1Sc3S4S5Hel7qua_Helictopleurus_quadripunctatus_CS.idba.79_MERGED    |
| --X-----X-XXX     | CP1Sc3S4S5Het7cas   | XXXXXXXXXXXXX----  | CP1Sc3S4S5Het7cas_Heteronitis_castelnaui_CS.idba.56             | XXXXXXXXXXXXX-XXX   | CP1Sc3S4S5Het7cas_Heteronitis_castelnaui_CS.idba.56_MERGED            |
| --X-----X-XXX     | CP1Sc3S4S5Hy7alc    | XXXXXXXXXXXXX----  | CP1Sc3S4S5Hy7alc_Hyalonthophagus_alcyon_CS.idba.42              | XXXXXXXXXXXXX-XXX   | CP1Sc3S4S5Hy7alc_Hyalonthophagus_alcyon_CS.idba.42_MERGED             |
| --X-----X-XXX     | CP1Sc3S4S5Li7mil    | --XXXXXXXX----     | CP1Sc3S4S5Li7mil_Liatongus_militaris_Scarab.idba.22             | --XXXXXXXX-X----    | CP1Sc3S4S5Li7mil_Liatongus_militaris_Scarab.idba.22_MERGED            |
| --X-----X-XXX     | CP1Sc3S4S5Mi7api    | XXXXXXXXXXXXX----  | CP1Sc3S4S5Mi7api_Millichus_apicalis_CS.idba.13                  | XXXXXXXXXXXXX-XXX   | CP1Sc3S4S5Mi7api_Millichus_apicalis_CS.idba.13_MERGED                 |
| --X-----X-XXX     | CP1Sc3S4S5On7ale    | XXXXXXXXXXXXX----  | CP1Sc3S4S5On7ale_Onitis_alexis_CS.idba.60                       | XXXXXXXXXXXXX-XXX   | CP1Sc3S4S5On7ale_Onitis_alexis_CS.idba.60_MERGED                      |
| --X-----X-XXX     | CP1Sc3S4S5On7caf    | XXXXXXXXXXXXX----  | CP1Sc3S4S5On7caf_Onitis_caffer_CS.idba.6                        | XXXXXXXXXXXXX-XX    | CP1Sc3S4S5On7caf_Onitis_caffer_CS.idba.6_MERGED                       |
| --X-----X-XXX     | CP1Sc3S4S5On7fal    | XXXXXXXXXXXXX----  | CP1Sc3S4S5On7fal_Onitis_falcatu CS.idba.22                      | XXXXXXXXXXXXX-XXX   | CP1Sc3S4S5On7fal_Onitis_falcatu CS.idba.22_MERGED                     |
| -XX-----X-XXX     | CP1Sc3S4S5On7ful    | -----XXXXXXXX      | CP1Sc3S4S5On7ful_Onitis_fulgidus_CS.idba.62                     | -----XXXXXXXX-XXX   | CP1Sc3S4S5On7ful_Onitis_fulgidus_CS.idba.62_MERGED                    |
| --X-----X-XXX     | CP1Sc3S4S5On7egr    | XXXXXXXXXXXXX----  | CP1Sc3S4S5On7egr_Onitice llus_egregius_CS.idba.9                | XXXXXXXXXXXXX-XX    | CP1Sc3S4S5On7egr_Onitice llus_egregius_CS.idba.9_MERGED               |
| --X-----X-XXX     | CP1Sc3S4S5On7bid    | -----XXXXXX        | CP1Sc3S4S5On7bid_Onthophagus_bidentatus_CS.idba.77              | --X-----XXXXX----   | CP1Sc3S4S5On7bid_Onthophagus_bidentatus_CS.idba.77_MERGED             |
| -XX-----XX----    | CP1Sc3S4S5On7cly    | XXXXXXXXXXXXX----  | CP1Sc3S4S5On7cly_Onthophagus_clypeatus_CS.idba.50               | XXXXXXXXXXXXX-XX    | CP1Sc3S4S5On7cly_Onthophagus_clypeatus_CS.idba.50_MERGED              |
| -XX-----XX----    | CP1Sc3S4S5On7coe    | XXXXXXXXXXXXX----  | CP1Sc3S4S5On7coe_Onthophagus_coenobita_CS.idba.24               | XXXXXXXXXXXXX-XX    | CP1Sc3S4S5On7coe_Onthophagus_coenobita_CS.idba.24_MERGED              |
| -X-----X----      | CP1Sc3S4S5On7fim    | XXXXXXXXXXXXX----  | CP1Sc3S4S5On7fim_Onthophagus_fimetarius_Scarab.idba.6           | XXXXXXXXXXXXX-XX    | CP1Sc3S4S5On7fim_Onthophagus_fimetarius_Scarab.idba.6_MERGED          |
| -X-----X----      | CP1Sc3S4S5On7gra    | XXXXXXXXXXXXX----  | CP1Sc3S4S5On7gra_Onthophagus_gracillipes_Scarab.idba.3          | XXXXXXXXXXXXX-XX    | CP1Sc3S4S5On7gra_Onthophagus_gracillipes_Scarab.idba.3_MERGED         |
| -XX-----XX----    | CP1Sc3S4S5On7hae    | XXXXXXXXXXXXX----  | CP1Sc3S4S5On7hae_Onthophagus_haematopus_CS.idba.41              | XXXXXXXXXXXXX-XX    | CP1Sc3S4S5On7hae_Onthophagus_haematopus_CS.idba.41_MERGED             |
| --XX-----         | CP1Sc3S4S5On7lat    | -XXXXXXXXXXXXX---- | CP1Sc3S4S5On7lat_Onthophagus_laticollis_Scarab.idba.13          | -XXXXXXXXXXXXX----  | CP1Sc3S4S5On7lat_Onthophagus_laticollis_Scarab.idba.13_MERGED         |
| --X-----X----     | CP1Sc3S4S5On7lon    | XXXXXXXXXXXXX----  | CP1Sc3S4S5On7lon_Onthophagus_longimanus_CS.idba.23              | XXXXXXXXXXXXX-XX    | CP1Sc3S4S5On7lon_Onthophagus_longimanus_CS.idba.23_MERGED             |
| --X-----X----     | CP1Sc3S4S5On7nit    | -XXXXXXXXXXXXX---- | CP1Sc3S4S5On7nit_Onthophagus_nitidior_CS.idba.10                | -XXXXXXXXXXXXX----  | CP1Sc3S4S5On7nit_Onthophagus_nitidior_CS.idba.10_MERGED               |
| --X-----X----     | CP1Sc3S4S5On7obs    | XXXXXXXXXXXXX----  | CP1Sc3S4S5On7obs_Onthophagus_obscurior_CS.idba.31               | XXXXXXXXXXXXX-XX    | CP1Sc3S4S5On7obs_Onthophagus_obscurior_CS.idba.31_MERGED              |
| -XX-----X----     | CP1Sc3S4S5On7och    | -----XXXXXX        | CP1Sc3S4S5On7och_Onthophagus_ochreatus_Scarab.idba.30           | -----XXXXX----      | CP1Sc3S4S5On7och_Onthophagus_ochreatus_Scarab.idba.30_MERGED          |
| --X-----X----     | CP1Sc3S4S5On7rhi    | XXXXXXXXXXXXX----  | CP1Sc3S4S5On7rhi_Onthophagus_rhinolophus_Scarab.idba.2          | XXXXXXXXXXXXX-XX    | CP1Sc3S4S5On7rhi_Onthophagus_rhinolophus_Scarab.idba.2_MERGED         |
| -X-----X----      | CP1Sc3S4S5On7ror    | XXXXXXXXXXXXX----  | CP1Sc3S4S5On7ror_Onthophagus_rorarius_CS.idba.1                 | XXXXXXXXXXXXX-XX    | CP1Sc3S4S5On7ror_Onthophagus_rorarius_CS.idba.1_MERGED                |
| --X-----X----     | CP1Sc3S4S5On7sem    | XXXXXXXXXXXXX----  | CP1Sc3S4S5On7sem_Onthophagus_semiareus_CS.idba.51               | XXXXXXXXXXXXX-XX    | CP1Sc3S4S5On7sem_Onthophagus_semiareus_CS.idba.51_MERGED              |
| -XX-----X-XX-     | CP1Sc3S4S5On7sim    | XXXXXXXXXXXXX----  | CP1Sc3S4S5On7sim_Onthophagus_similis_CS.idba.37                 | XXXXXXXXXXXXX-XX    | CP1Sc3S4S5On7sim_Onthophagus_similis_CS.idba.37_MERGED                |
| -XX-----X----     | CP1Sc3S4S5On7vac    | -XXXXXXXXXXXXX---- | CP1Sc3S4S5On7vac_Onthophagus_vacca_CS.idba.55                   | -XXXXXXXXXXXXX----  | CP1Sc3S4S5On7vac_Onthophagus_vacca_CS.idba.55_MERGED                  |
| --X-----X----     | CP1Sc3S4S5On7vul    | -----XXXXXXXX      | CP1Sc3S4S5On7vul_Onthophagus_vulpes_CS.idba.70                  | --X-----XXXXXX----  | CP1Sc3S4S5On7vul_Onthophagus_vulpes_CS.idba.70_MERGED                 |
| --X-----X-XXX     | CP1Sc3S4S5Ph7ard    | XXXXXXXXXXXXX----  | CP1Sc3S4S5Ph7ard_Phalops_ardea_CS.idba.8                        | XXXXXXXXXXXXX-XX    | CP1Sc3S4S5Ph7ard_Phalops_ardea_CS.idba.8_MERGED                       |
| --X-----X-XXX     | CP1Sc3S4S5Pr7bic    | XXXXXXXXXXXXX----  | CP1Sc3S4S5Pr7bic_Proagoderus_bicallosus_CS.idba.3               | XXXXXXXXXXXXX-XXX   | CP1Sc3S4S5Pr7bic_Proagoderus_bicallosus_CS.idba.3_MERGED              |
| --X-----X-XXX     | CP1Sc3S4S5Pr7sch    | XXXXXXXXXXXXX----  | CP1Sc3S4S5Pr7sch_Proagoderus_schwani CS.idba.12                 | XXXXXXXXXXXXX-XX    | CP1Sc3S4S5Pr7sch_Proagoderus_schwani CS.idba.12_MERGED                |
| -X-----X-XXX      | CP1Sc3S4S5Ti7sar    | XXXXXXXXXXXXX----  | CP1Sc3S4S5Ti7sar_Tiniocellus_sarawacus_CS.idba.21               | XXXXXXXXXXXXX-XXX   | CP1Sc3S4S5Ti7sar_Tiniocellus_sarawacus_CS.idba.21_MERGED              |
| --X-----X-XXX     | CP1Sc3S4S5Tra7dim   | XXXXXXXXXXXXX----  | CP1Sc3S4S5Tra7dim_Tragiscus_dimidiatus_Scarab.idba.4            | XXXXXXXXXXXXX-XX    | CP1Sc3S4S5Tra7dim_Tragiscus_dimidiatus_Scarab.idba.4_MERGED           |
| -XX-----XX----    | CP1Sc3S4T5Gn7var    | XXXXXXXXXXXXX----  | CP1Sc3S4T5Gn7var_Gnorimus_variabilis_ame. idba.13               | XXXXXXXXXXXXX-XX    | CP1Sc3S4T5Gn7var_Gnorimus_variabilis_ame. idba.13_MERGED              |
| -XX-----X-XXX     | CP1Sc3E4Eu7hae      | XXXXXXXXXXXXX----  | CP1Sci3E4Eu7hae_Eucinetus_haemorrhoidolis_842710_idba_contig_14 | XXXXXXXXXXXXX-XXX   | CP1Sc3E4Eu7hae_Eucinetus_haemorrhoidolis_842710_idba_contig_14_MERGED |
| -XX-----X----     | CP1Sci3S4E17min     | XXXXXXXXXXXXX----  | CP1Sci3S4E17min_Elodes_minuta_ame. idba.24                      | XXXXXXXXXXXXX----   | CP1Sci3S4E17min_Elodes_minuta_ame. idba.24_MERGED                     |
| -X-----X----      | CP1Sci3S4Sc7orb     | XXXXXXXXXXXXX----  | CP1Sci3S4Sc7orb_Scirtes_orbicularis_ame. idba.100               | XXXXXXXXXXXXX----   | CP1Sci3S4Sc7orb_Scirtes_orbicularis_ame. idba.100_MERGED              |
| -XX-----          | CP1T3An40m7f1o      | --XXXXXXXXXXXX     | CP1T3An40m7f1o_Omonadus_floralis_HQ232825                       | -XXXXXXXXXXXX----   | CP1T3An40m7f1o_Omonadus_floralis_HQ232825_MERGED                      |
| -XX-----          | CP1T3An4St7tob      | XXXXXXXXXXXXX----  | CP1T3An4St7tob_Stricticomus_tobias_ame. idba.57                 | XXXXXXXXXXXXX----   | CP1T3An4St7tob_Stricticomus_tobias_ame. idba.57_MERGED                |
| -XX-----X-XXX     | CP1T3B4Bo7sch       | XXXXX-----         | CP1T3B4Bo7sch_Boros_schneideri_ame. idba.177                    | XXXXX-----X-XXX     | CP1T3B4Bo7sch_Boros_schneideri_ame. idba.177_MERGED                   |
| -X-----X----      | CP1T3C4C5C17mic     | XXXXXXXXXXXXX----  | CP1T3C4C5C17mic_Cis_micans_ame. idba.118                        | XXXXXXXXXXXXX----   | CP1T3C4C5C17mic_Cis_micans_ame. idba.118_MERGED                       |
| -XX-----XX-XXX    | CP1T3C4C5O7r7pyg    | --XXXXXX-----      | CP1T3C4C5O7r7pyg_Orthocis_pygmaeus_ame. idba.147                | -XXXXXX--XX-XXX     | CP1T3C4C5O7r7pyg_Orthocis_pygmaeus_ame. idba.147_MERGED               |
| -X-----X-XXX      | CP1T3Me4Mik7gra     | --XXXXXXXXXXXX     | CP1T3Me4Mik7gra_Mikadonius_gracilis_JX412823                    | -XXXXXXXXXXXX-XXX   | CP1T3Me4Mik7gra_Mikadonius_gracilis_JX412823_MERGED                   |
| -X-----X----      | CP1T3Me4Os7bip      | --XXXXXXXXXXXX     | CP1T3Me4Os7bip_Osypa_bipunctata_JX313675                        | -X-XXXXXXXXXXXX---- | CP1T3Me4Os7bip_Osypa_bipunctata_JX313675_MERGED                       |
| XXXXXXXXXXXXX---- | CP1T3Mo4Mo7atr      | XXXXXXXXXXXXX----  | CP1T3Mo4Mo7atr_Mordella atrata_NC_013254                        | XXXXXXXXXXXXX----   | CP1T3Mo4Mo7atr_Mordella atrata_NC_013254_MERGED                       |
| -X-----X----      | CP1T3Mo4Morde7mil   | XXXXXXXXXXXXX----  | CP1T3Mo4Morde7mil_Mordellochroa_millieri_ame. idba.36           | XXXXXXXXXXXXX----   | CP1T3Mo4Morde7mil_Mordellochroa_millieri_ame. idba.36_MERGED          |
| -XX-----XX----    | CP1T3Mo4To7buc      | XXXXXXXXXXXXX----  | CP1T3Mo4To7buc_Tomoxia_bucephala_ame. idba.63                   | XXXXXXXXXXXXX-XX    | CP1T3Mo4To7buc_Tomoxia_bucephala_ame. idba.63_MERGED                  |
| -XX-----X-XXX     | CP1T3My4My7qua      | --XXXXXXXXXXXX     | CP1T3My4My7qua_Mycetophagus_quadripustulatus_HQ232824           | -XXXXXXXXXXXX-XXX   | CP1T3My4My7qua_Mycetophagus_quadripustulatus_HQ232824_MERGED          |
| -X-----X----      | CP1T3O4I7s7cae      | XXXXXXXXXXXXX----  | CP1T3O4I7s7cae_Iscnomera caerulea_JX412790                      | XXXXXXXXXXXXX-XX    | CP1T3O4I7s7cae_Iscnomera caerulea_JX412790_MERGED                     |

|                     |                   |                     |                                                                        |                    |                                                                               |
|---------------------|-------------------|---------------------|------------------------------------------------------------------------|--------------------|-------------------------------------------------------------------------------|
| -XX-----            | CP1T304Is7cya     | XXXXXXXXXXXXX----   | CP1T304Is7cya_Ischnomera_cyanea_BIUK.idba.38                           | XXXXXXXXXXXXX----  | CP1T304Is7cya_Ischnomera_cyanea_BIUK.idba.38_MERGED                           |
| -XX-----XXX         | CP1T3040e7vir     | --XXXXXXXXXXXXX---- | CP1T3040e7vir_Oedemera_virescens_HQ232826                              | -XXXXXXXXXXXXX---- | CP1T3040e7vir_Oedemera_virescens_HQ232826_MERGED                              |
| -X-----             | CP1T3P4Sc7pec     | XXXXXXXXXXXXX----   | CP1T3P4Sc7pec_Schizotus_pectinicornis_ameie.idba.83                    | XXXXXXXXXXXXX----  | CP1T3P4Sc7pec_Schizotus_pectinicornis_ameie.idba.83_MERGED                    |
| --X-----XX--XXX     | CP1T3R4Pe7fen     | XXXXXXXXXXXXX----   | CP1T3R4Pe7fen_Pelecotoma_fennica_842676_idba_contig_23                 | XXXXXXXXXXXXX----  | CP1T3R4Pe7fen_Pelecotoma_fennica_842676_idba_contig_23_MERGED                 |
| -X-----             | CP1T3Sa4Li7cur    | XXXXXXXXXXXXX----   | CP1T3Sa4Li7cur_Lissodema_cursor_ameie.idba.80                          | XXXXXXXXXXXXX----  | CP1T3Sa4Li7cur_Lissodema_cursor_ameie.idba.80_MERGED                          |
| --X-----XX--XXX     | CP1T3Sa4Rh7ruf    | XXXXXXXXXXXXX----   | CP1T3Sa4Rh7ruf_Rhinosimus_ruficollis_BIUK.idba.39                      | XXXXXXXXXXXXX----  | CP1T3Sa4Rh7ruf_Rhinosimus_ruficollis_BIUK.idba.39_MERGED                      |
| -X-----             | CP1T3Sa4Sa7aen    | -----XXXXX----      | CP1T3Sa4Sa7aen_Salpingus_aeneus_JX313680                               | -X-----XXXXX----   | CP1T3Sa4Sa7aen_Salpingus_aeneus_JX313680_MERGED                               |
| -XX-----XXX         | CP1T3Sa4Vi7ruf    | XXXXXXXXXXXXX----   | CP1T3Sa4Vi7ruf_Vincenzellus_ruficollis_833403_Salpingidae_Vincenzellus | XXXXXXXXXXXXX----  | CP1T3Sa4Vi7ruf_Vincenzellus_ruficollis_833403_Salpingidae_Vincenzellus_MERGED |
| -XX-----XX--XXX     | CP1T3Sc5An7mac    | XXXXXXXXXXXXX----   | CP1T3Sc5An7mac_Anasps_maculata_BIUK.idba.33                            | XXXXXXXXXXXXX----  | CP1T3Sc5An7mac_Anasps_maculata_BIUK.idba.33_MERGED                            |
| -X-----             | CP1T3Sc5Cy7pha    | XXXXXXXXXXXXX----   | CP1T3Sc5Cy7pha_Cyrtanasps_phalerata_ameie.idba.38                      | XXXXXXXXXXXXX----  | CP1T3Sc5Cy7pha_Cyrtanasps_phalerata_ameie.idba.38_MERGED                      |
| -X-----             | CP1T3T4D5Sc7met   | XXXXXXXXXXXXX----   | CP1T3T4D5Sc7met_Scaphidema_metallicum_ameie.idba.104                   | XXXXXXXXXXXXX----  | CP1T3T4D5Sc7met_Scaphidema_metallicum_ameie.idba.104_MERGED                   |
| XXXX-XXX-X-XXX----  | CP1T3T4D5U17der   | XXXXXXXXXXXXX----   | CP1T3T4D5U17der_Ulomoides_dermestoides_NC_025332                       | XXXXXXXXXXXXX----  | CP1T3T4D5U17der_Ulomoides_dermestoides_NC_025332_MERGED                       |
| -XX-----            | CP1T3T4T5Na7lae   | XXXXXXXXXXXXX----   | CP1T3T4T5Na7lae_Nalassus_laevioctostriatus_2VGB.idba.14                | XXXXXXXXXXXXX----  | CP1T3T4T5Na7lae_Nalassus_laevioctostriatus_2VGB.idba.14_MERGED                |
| -----X--X-X--       | CP1T3T4T5Sca7unc  | XXXXXXX-XXXXX----   | CP1T3T4T5Sca7unc_Scaurus_uncinus_Soil.idba.92                          | XXXXXXX-XXXXX-X-   | CP1T3T4T5Sca7unc_Scaurus_uncinus_Soil.idba.92_MERGED                          |
| XXXXXXXXX-X-XXX-XXX | CP1T3T4T5Te7mol   | XXXXXXXXXXXXX----   | CP1T3T4T5Te7mol_Tenebrio_molitor_NC_024633                             | XXXXXXXXXXXXX----  | CP1T3T4T5Te7mol_Tenebrio_molitor_NC_024633_MERGED                             |
| XXXXXXXXXX-XXX----  | CP1T3T4Tr7aud     | XXXXXXXXXXXXX----   | CP1T3T4Tr7aud_Tribolium_audax_NC_024600                                | XXXXXXXXXXXXX----  | CP1T3T4Tr7aud_Tribolium_audax_NC_024600_MERGED                                |
| -XX-----XX--XXX     | CP1T3Te4T5Te7fun  | XXXXXXXXXXXXX----   | CP1T3Te4T5Te7fun_Tetratoma_fungorum_ameie.idba.12                      | XXXXXXXXXXXXX----  | CP1T3Te4T5Te7fun_Tetratoma_fungorum_ameie.idba.12_MERGED                      |
| --X-----XX--XXX     | CP1T3Z4Z5U6Us7lac | XXXXXXXXXXXXX----   | CP1T3Z4Z5U6Us7lac_Usechus_lacerta_679350_idba_contig_8                 | XXXXXXXXXXXXX----  | CP1T3Z4Z5U6Us7lac_Usechus_lacerta_679350_idba_contig_8_MERGED                 |

## Manual correction of erroneous sequences

This list summarizes the manual corrections done for the tree of Figure 3 (and the complete tree below). These correspond to NCBI terminals whose taxonomic identification (their NCBI taxonomic id) appears erroneous in light of their phylogenetic placement.

### \*\*\*NCBI terminals with probable erroneous taxonomic identifications\*\*\*

- CP1Cur3C4M5M6Li7cor
- CP1Cu3Lat4Ak7sle
- CP1S3S4Ps5Ba7del
- CP1Hi3H4S5Gn7com
- CP1Cu3N4Am7C27
- CP1Bo3D4Tro7MC2010
- CP1Cur3C4Ma5Ma7cer
- CP1Ch3Ce4D5Cy7asa
- CP1Cur3C4M5Ph6Cr7pun
- CP1S3Si4S5De7qua
- CP1Cu3N4Cy5Cy7MJM2013

### \*\*\* minor errors detected in Genbank \*\*\*\*

- CP1S3S4Ox5Ox7\_Oxytelus\_sp\_JX412796 (should use *Anotylus rugatilis*)
- CP1S3S4O5Ne7TJH2005 is same species as  
CP1S3S4O5Ne7bru\_Neophonus\_bruchi\_Staph.idba.0\_MERGED

## NCBI extraction and Blast threshold

The following table reports the number of mitochondrial loci extracted from the NCBI at different blast Evalue thresholds. A value of 1E-5 was retained and is the baseline used for the differences reported below:

| Locus           | #sequence at 1E-5 | Variation at different Blast thresholds |       |                  |       |       |       |
|-----------------|-------------------|-----------------------------------------|-------|------------------|-------|-------|-------|
|                 |                   | 1E-12                                   | 1E-09 | 1E-05 (baseline) | 1E-03 | 1E+00 | 1E+01 |
| <i>12S</i>      | 4105              | -5                                      | -1    | 0                | 0     | +5    | +19   |
| <i>16Sa</i>     | 14723             | -4                                      | 0     | 0                | 0     | +33   | +49   |
| <i>16Sb</i>     | 13487             | -13                                     | 0     | 0                | 0     | +54   | +96   |
| <i>ATP6</i>     | 292               | -1                                      | 0     | 0                | 0     | +7    | +51   |
| <i>cox3</i>     | 448               | 0                                       | 0     | 0                | 0     | 0     | +4    |
| <i>cox2</i>     | 7363              | -1                                      | 0     | 0                | 0     | +44   | +148  |
| <i>cox1seg1</i> | 46546             | -8                                      | 0     | 0                | 0     | +7    | +11   |
| <i>cox1seg2</i> | 46009             | -1                                      | 0     | 0                | 0     | +1    | +64   |
| <i>cytb</i>     | 5370              | -6                                      | 0     | 0                | 0     | +0    | +1    |
| <i>ef1a</i>     | 3153              | -9                                      | -3    | 0                | +3    | +3    | +3    |
| <i>nad1</i>     | 360               | 0                                       | 0     | 0                | 0     | +6    | +63   |
| <i>nad2</i>     | 612               | -2                                      | -2    | 0                | 0     | +28   | +87   |
| <i>nad3</i>     | 287               | -1                                      | 0     | 0                | 0     | +6    | +30   |
| <i>nad4</i>     | 290               | 0                                       | 0     | 0                | 0     | +15   | +35   |
| <i>nad5</i>     | 1800              | 0                                       | 0     | 0                | 0     | +9    | +105  |
| <i>nad6</i>     | 191               | -29                                     | -19   | 0                | +14   | +30   | +76   |

We ran the blast extraction at different Blast evalue thresholds and observed the variation in the number of sequences extracted. When changing the blast Evalue threshold between 1e-12 and 1e-3, there is almost no change in the number of extracted sequences. This indicates that the criteria used in the pipeline are efficient in extracting all loci from the Genbank Coleopteran data (evalue<1e-5, word size =12, align\_length>=60% of the expected locus length). The only notable exception is the locus nad6, for which the number of extracted sequences is more dependant to the used threshold. After observing in detail, the new sequences extracted at higher Evalue thresholds, we observed that the corresponding Blast alignments were very short (dozens of bases) and were mainly disturbed by the second half of this gene, which contains a large portion of AT-rich segments. AT-rich segments are typically producing lower Evalues, because they are abundant in reference databases and the probability to have detected homology by chance and not because of a real signal (the meaning of the EValue), is higher. This mean that in the future, the Evalue value threshold should be raised for this Locus, or that better bait sequences should be used. Finally, for several loci, dozens of new sequences are extracted when very weak (and generally not recommended) thresholds of 0.1 or 1 are chosen. This is particularly true for *cox2* and some *nad* genes. These numbers should however be taken with caution. In fact, several of the new sequences are erroneous hits due to the sequence patterns shared by the different mitochondrial genes (similar regions between the different *nad* gene).

## Likelihood of the 20 tree searches based on the NCBI+MMG min3loci 1RY\_3Del matrix

We launched 20 searches based on the NCBI+MMG min3loci 1RY\_3Del matrix, the best tree (see below, seed = 12000) was used as starting tree for the search based on the NCBI+MMG min2loci 1RY\_3Del matrix (topology unconstrained). RAxML command:

```
raxmlHPC-PTHREADS -T 12 -n result_min3loci_smv5.1_seed12000 -s infile.txt -q partitions.txt -p 12000 -k -c 25 -m GTRCAT
```

| RAxML seed (-p) | Gamma-based Likelihood | GAMMA-based Score of best tree | time (hours) | diff to best.    |
|-----------------|------------------------|--------------------------------|--------------|------------------|
| 1000            | -11450706.323166       | -11450306.278547               | 118.416336   | -436.6692709997  |
| 2000            | -11451121.951837       | -11450571.131743               | 99.527583    | -701.5224670004  |
| 3000            | -11450905.917378       | -11450424.776289               | 117.397756   | -555.1670129988  |
| 4000            | -11450695.323051       | -11450132.612988               | 113.556559   | -263.0037120003  |
| 5000            | -11450574.745977       | -11450226.311419               | 131.865519   | -356.7021430004  |
| 6000            | -11451095.862001       | -11450515.188733               | 150.632361   | -645.5794569999  |
| 7000            | -11450840.566406       | -11450141.221002               | 112.649898   | -271.611725999   |
| 8000            | -11451099.812055       | -11450562.367976               | 103.53299    | -692.7587000001  |
| 9000            | -11451038.838944       | -11450574.763927               | 107.389821   | -705.1546509992  |
| 10000           | -11450999.71374        | -11450638.532262               | 119.203391   | -768.9229859989  |
| 11000           | -11450803.022373       | -11450319.245878               | 100.511854   | -449.6366019994  |
| 12000           | -11450428.470626       | -11449869.609276               | 124.213404   | <b>(best)</b>    |
| 13000           | -11450558.60822        | -11450214.256986               | 106.185383   | -344.6477099992  |
| 14000           | -11450694.326608       | -11450315.357446               | 114.860602   | -445.7481699996  |
| 15000           | -11450675.505885       | -11450182.739883               | 153.660767   | -313.1306069996  |
| 16000           | -11450922.880813       | -11450268.350853               | 110.463154   | -398.7415769994  |
| 17000           | -11450701.234511       | -11450250.937053               | 111.724028   | -381.3277770001  |
| 18000           | -11450850.682595       | -11450266.0749                 | 101.416929   | -396.465623999   |
| 19000           | -11451405.119621       | -11450915.764047               | 120.598017   | -1046.1547710002 |
| 20000           | -11451133.805351       | -11450629.176252               | 121.664275   | -759.5669759996  |

# Annotation of NCBI+MMG min2loci 1RY\_3Del tree

Total number in this tree based on a minimum of two loci is 15983.  
Use Suppl. File S2 to access taxonomic code details.

## 1. Suborder monophyly and basal relationships.

Molecular studies have generally recovered the four suborders as monophyletic, but their relationships are not supported. Recent consensus is (Out (Pol (Arc (Myx + Ade)))) based on transcriptomes (Misof et al., 2014), PhyloBayes analysis of mitogenomes (Timmermans et al., 2016), and multiple nuclear markers (Mckenna et al., 2015). Observed relationships in minimum-2 tree is (Out (Myx (Arc (Ade + Pol))))). Other trees from min3 and NCBI-only data show (Out (Myx (Arc (Pol+Ade))))).

## 2. Archostemata (total number of terminals: 9; codes starting with code CAr1).

All monophyletic except for two 18S sequences of Myx sister to Ar. Three families are represented: (Micromalthidae, (Cupedidae + Ommatidae)). Two contigs from a Bornean metagenome probably correspond to a single specimen.

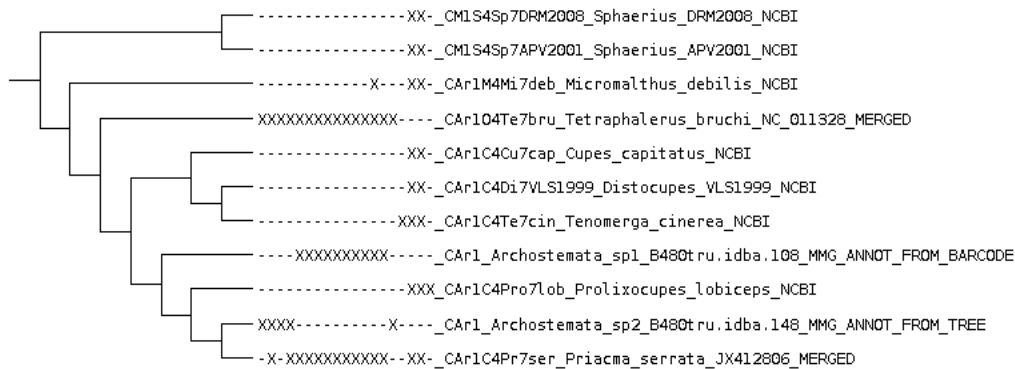

## 3. Myxophaga (25 terminals, ; codes starting with CM1).

The suborders are monophyletic except for two cox1+18S sequences of Sphaeriusidae that are sister to Archostemata. Four families are represented, with relationships (Torridincolidae ((Lepiceridae, Sphaeriusidae) Hydroscaphidae)).

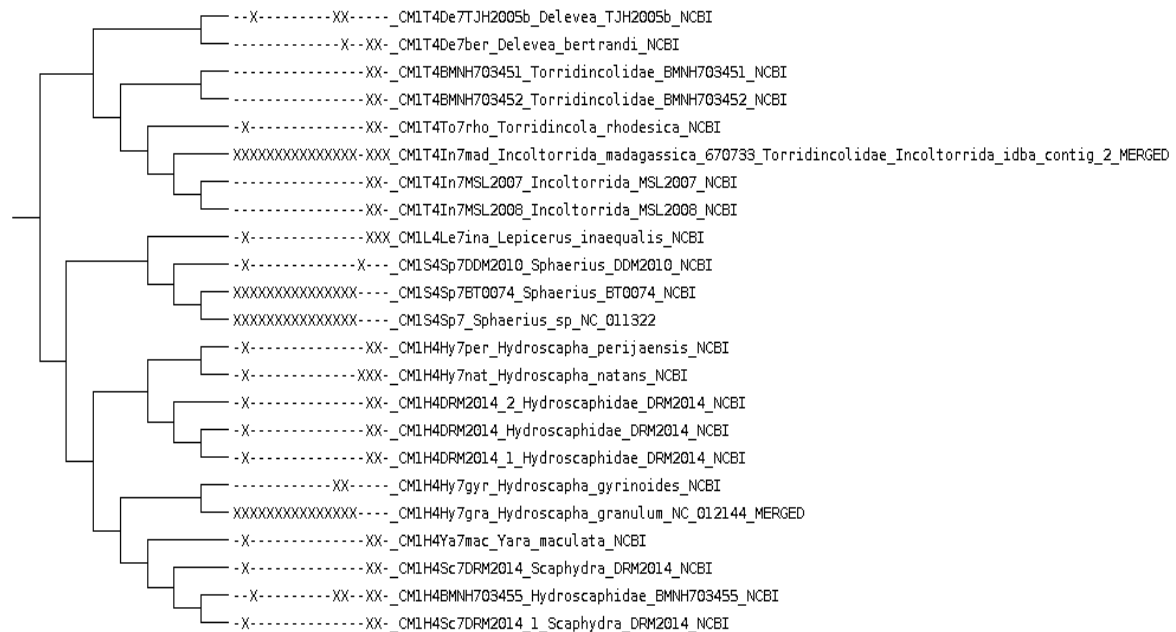

4. **Adephaga (3403 terminals, codes starting with CA1).**

Basal relationships have been separated into reciprocally monophyletic aquatic Hydradephaga and terrestrial Geadephaga (Maddison et al., 2009; Shull et al., 2001) which is confirmed by recent full mitogenome studies (Lopez et al., submitted). Here we find a paraphyletic Hydradephaga, with a comb-like arrangement of ((Noteridae + Meruidae) (Haliplidae + Dytiscoidea) ((Gyrinidae (Cicindelidae + Carabidae/Trachypachidae))))). The topology with basal split of (Noteridae + Meruidae) from all others matches Timmermans et al. 2016. Hydradephaga are paraphyletic also in (Bocak et al., 2014), but with Gyrinidae at the basal split. (Mckenna et al., 2015) constrain the monophyly of Geadephaga and Hydradephaga.

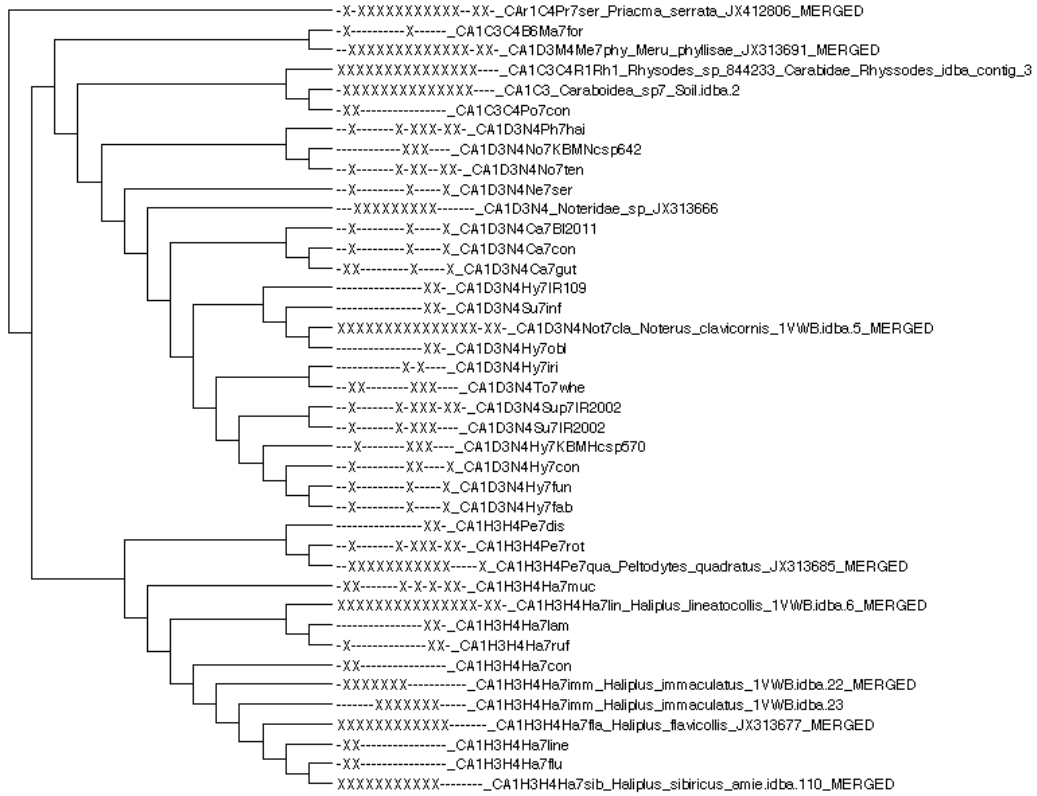



5. **Dytiscoidea (1518 terminals, codes starting with CA1D3).**The superfamily contains six families.

- a. **Basal relationships of Dytiscoidea.** The tree shows ((Aspyditidae + Amphizoidae) (Hygrobiidae (Dytiscidae))), which is in agreement with (Balke et al., 2008). Noteridae + Meruidae is placed distantly at the base of Adephaga tree (see above). All families are monophyletic, except for a few representatives of Laccophilinae are included with Hygrobiidae.
- b. **Dytiscidae (1488 terminals, codes starting with CA1D3D4).**

The most complete molecular tree available is (Ribera, 2008), which found several subfamilies non-monophyletic. The current tree is more in agreement with the subfamily classification than the summary tree of which are recovered as monophyletic here.

  - i. Dytiscinae is monophyletic, except for the distantly related Cybristrini. Ribera, 2008 recovered tribes Acilini and Hydatcini/Hydradini in a clade different from Dytiscini, which is not observed here.
  - ii. Agabinae is monophyletic: Hydrotrupes is sister to Platynectes and relatives, which combined are sister to Agabini; these groups were not a monophylum in Ribera, 2008. The two large genera Ilybius/Ilybiosoma and Agabus are reciprocally monophyletic except for species of Platambus which are scattered throughout the Agabini.
  - iii. Laccophilinae is monophyletic and includes Agabetini, which was recovered distant to Laccophilini in Ribera, 2008.
  - iv. Copelatinae: Agaporomorphus is deeply embedded in this subfamily, near Madaglymbus (not recovered as closely related to other Copelatinae in Ribera, 2008. Liopterus is sister to the large Aglymbus/Copelatus clade, which is reciprocally monophyletic to the Exocelina/Papuadytes clade (Balke et al., 2004).
  - v. Relationships within Dytiscidae show four main lineages:
    1. Basal split is Aubehydrini (Dytiscinae) as sister to all others. In Ribera, 2008 Aubehydrini is recovered near the base together with Hydrodytinae /Matinae (here found nearer Hydroporinae, clade 4.)
    2. ((Coptotominae + Lancetinae) Agabinae)
    3. ((Colymbetinae + Dytiscinae)) Copelatinae) (NB: Copelatinae are not fully monophyletic because of four species represented by 18S only are placed distantly).
    4. ((Matinae (Laccophilinae Cybistrini)) ((Hydrodytinae) Hydroporinae))).

**Important note: The following tree is a compressed version of the 1488 Dytiscidae terminals. Details are part of the complete tree included in Suppl File S4 and S5 (which spans over many pages). The corresponding tree can be reached by searching for the Label prefix “CA1D3D4”.**

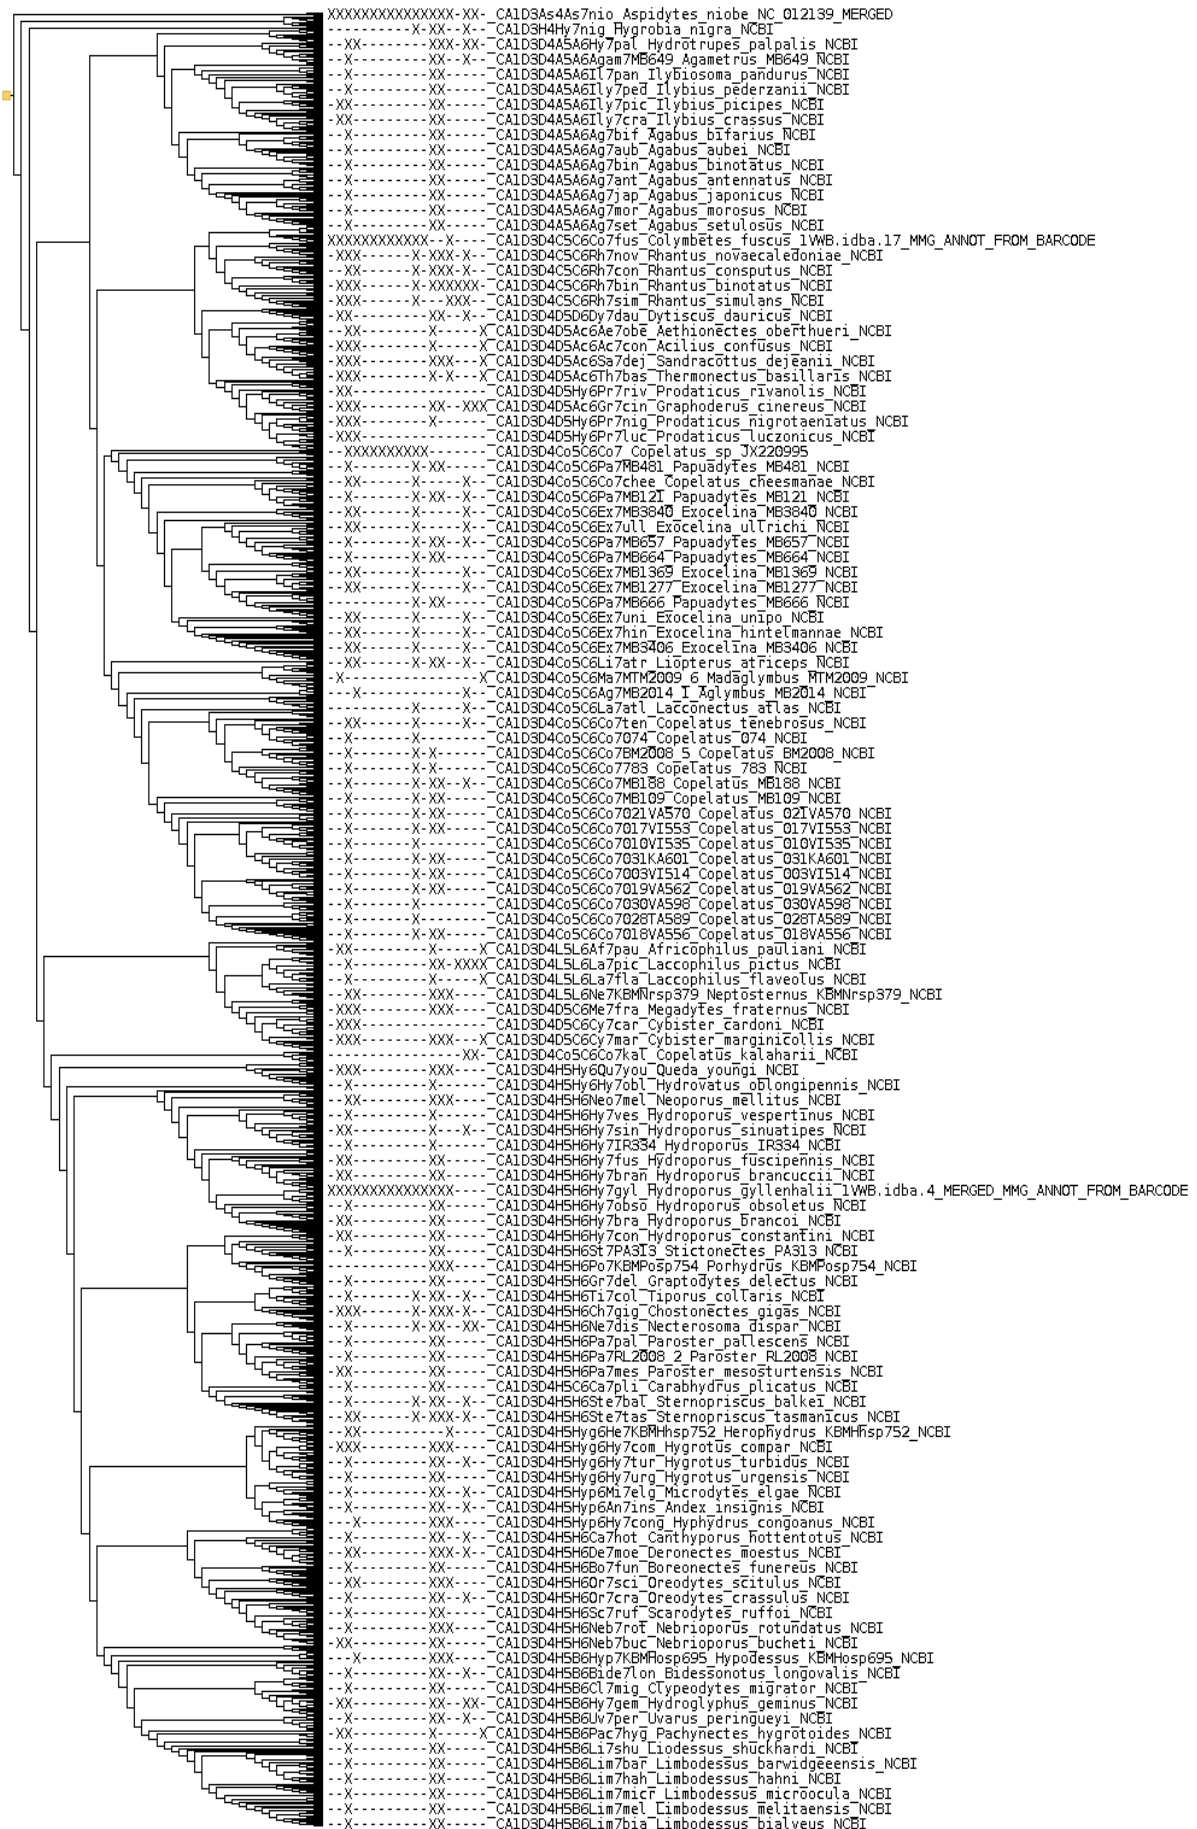

6. **Gyrinoidea (Gyrinidae) (93 terminals, codes starting with CA1G3).**

A recent study of (Miller and Bergsten, 2012) produced a tree very similar to that found here. The basal split is Spanglerogyrus versus all others, as expected; two main clades include ((Macrogyrus + Dineutus) Gyrinus) and (Heterochilus (Orectochilus ((Patrus + Gyretes) Orectogyrus))). Miller and Bergsten recover (Macrogyrus + Dineutus) as sister to the latter clade, but with low support.

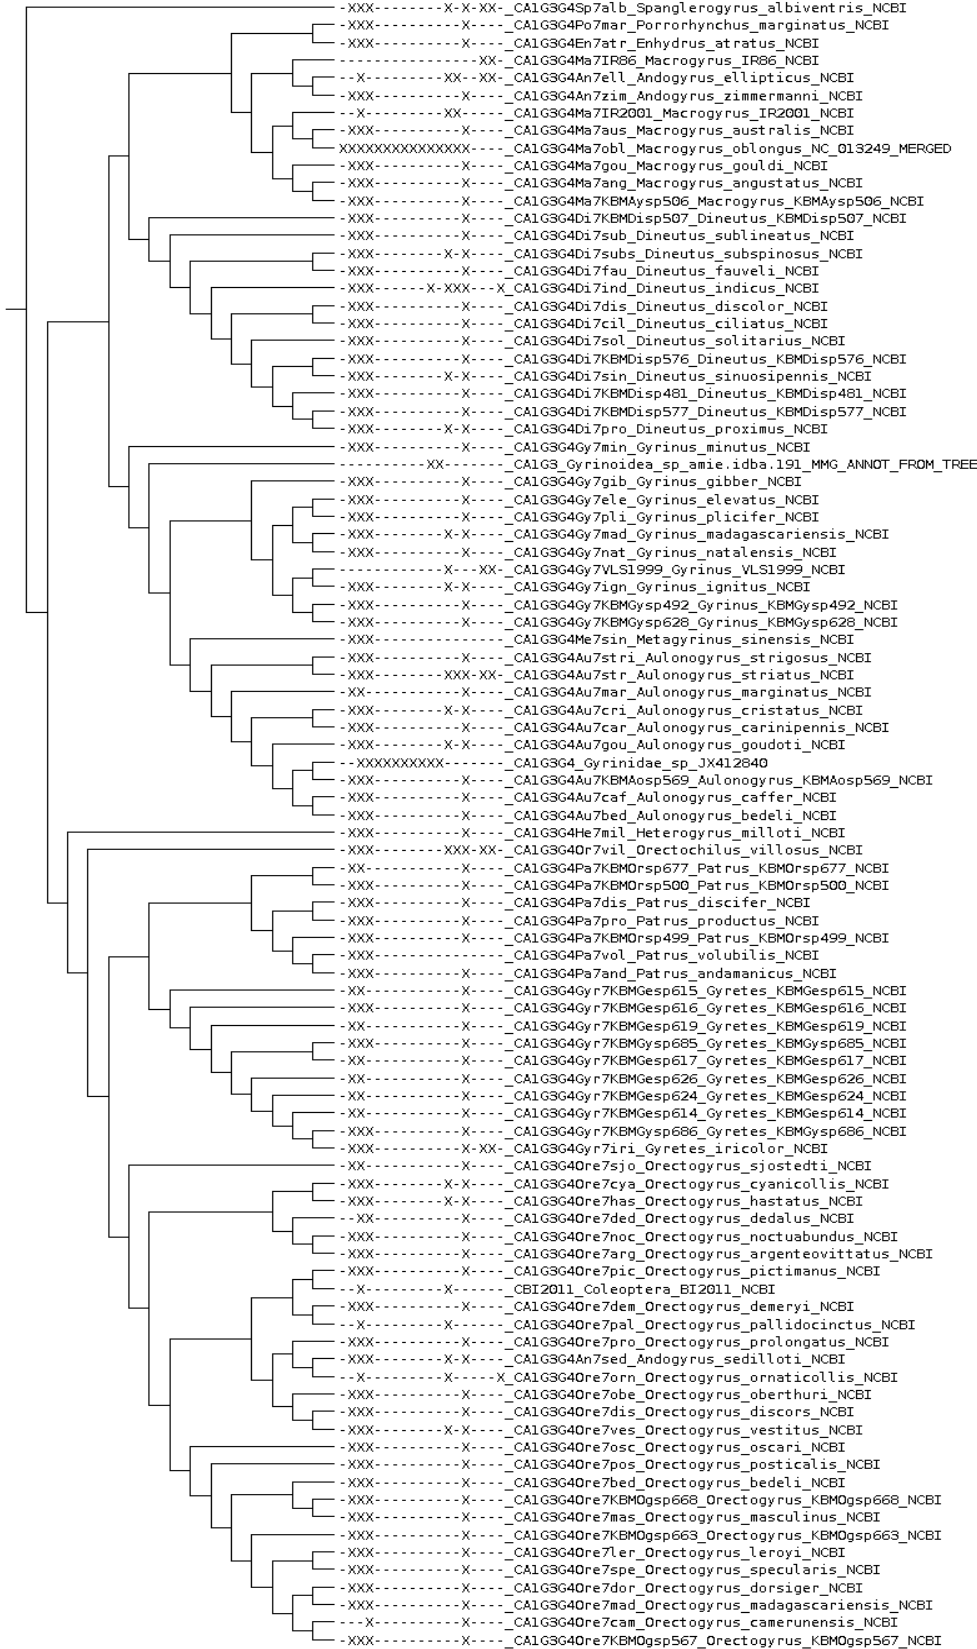

7. **Carabaeoidea (=Geadephaga) (1774 terminals, codes starting with CA1C3).**

A major attempt for resolving basal relationships was by (Maddison et al., 1999) using 18S, and basal relationships in the large subfamily Harpalinae (Ober, 2002) based on 28S and wingless. The NCBI taxonomy recognises four families, Carabidae, Cicindelidae, Trachypachidae and Rhysodidae. We find Cicindelidae and Carabidae + Trachypachidae split into two sister lineages. (The single representative of Rhysodidae groups with Cicindelidae).

a. **Cicindelidae (442 terminals, codes starting with CA1C3C4C5).**

Basal relationships have been assessed by (Vogler and Pearson, 1996) using 16S and 18S rRNA. Treated as subfamily of Carabidae in the GenBank taxonomy but is sister to all other caraboids in the current tree (except for three members of tribe Rhysodini represented by 18S sequences and thus deserves family status (also see (López-López and Vogler, n.d.) et al., in press). Cicindelidae is monophyletic, with three main groups recognised in NCBI.

- i. Megacephalini: split into two clades, including a diverse set of species of several species poor Southern Hemisphere genera (subtribe Omina), and the cosmopolitan genus Megacephala s.l. (subtribe Megacephalina). The latter is sister to Collyridini, a group of mainly arboreal species. Some inconsistencies in tree due to double entry for misspelling of Platychile and Platychila
- ii. Cicindelini: recovered as monophyletic, includes several genera frequently assigned to subtribe Prothymina. Basal split is genus (Pseud)oxycheila, and comb-like arrangement of other genera, in agreement with Vogler and Pearson 1996.
  1. Cicindelina: this group is recovered as the terminal portion of Cicindelidae, and recovers broadly the subclades of North American groups (Vogler et al., 2005) and worldwide clades based on a smaller subsample, including clades I, II, and III of (Pons et al., 2004), and Asian lineages (Sota et al., 2011). Genus and subgenus assignments in Cicindelina have been applied inconsistently, which complicates the use of measures of monophyly.

**Important note: The following tree is a compressed version of the 442 Cicindelidae terminals. Details are part of the complete tree included in Suppl File S4 and S5 (which spans over many pages). The corresponding tree can be reached by searching for the Label prefix “CA1C3C4C5”.**

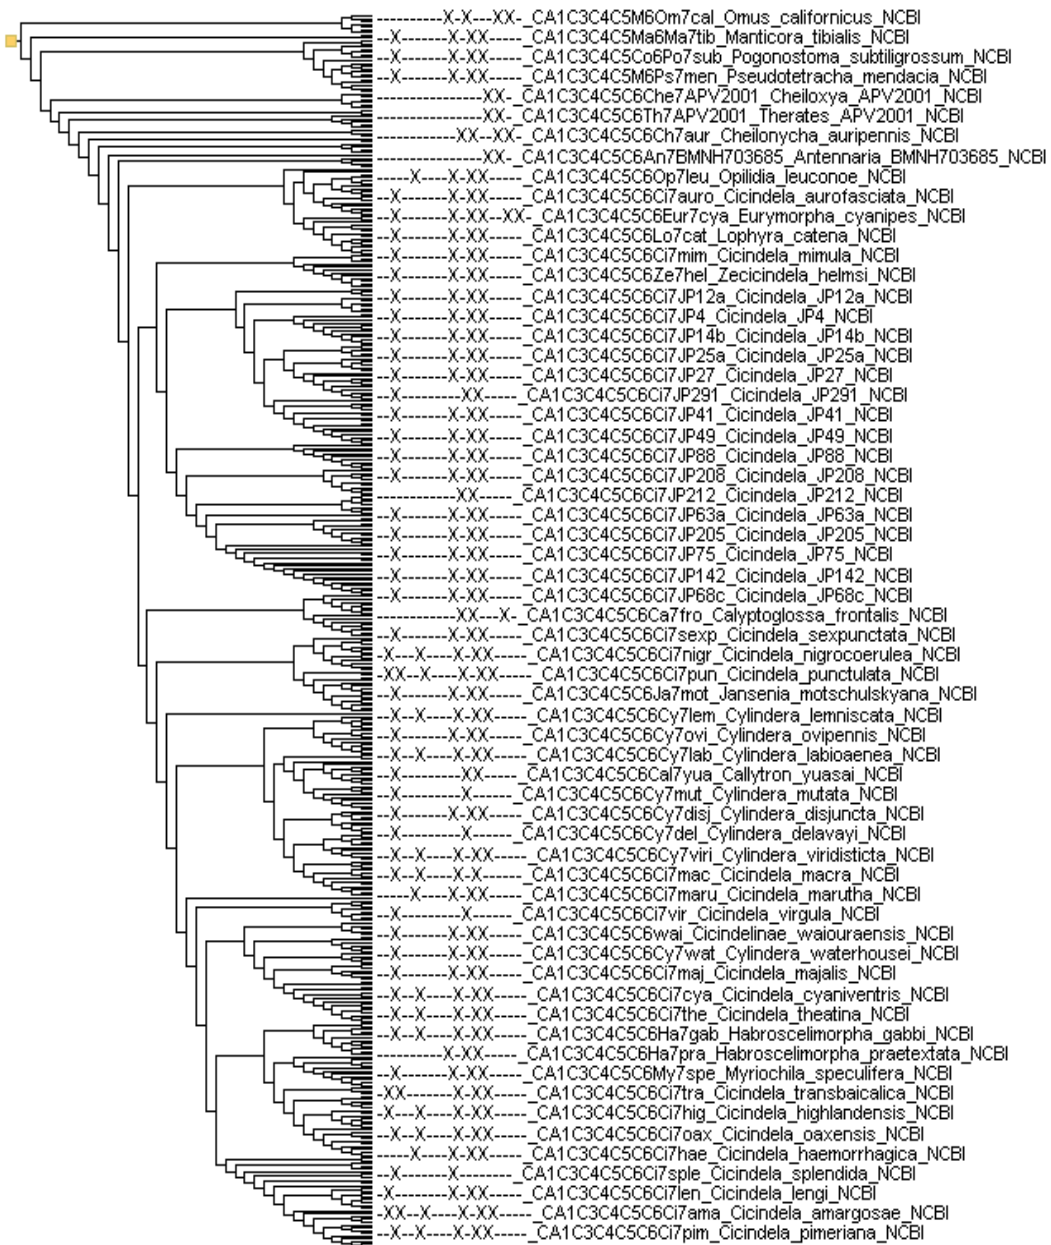

b. **Carabidae (1332 terminals, codes starting with CA1C3C4).**

Data are contributed by Maddison et al.'s (1999) study using 18S, and basal relationships in the large subfamily Harpalinae (Ober and Heider, 2010) based on 28S and wingless. This is complemented by several studies on large genera, e.g. on *Carabus* (Deuve et al., 2012), *Bembidion* (Maddison, 2012), Trechitae and various genera of Harpalinae.

i. **Carabidae.** They are a monophyletic (with the inclusion of Trachypachidae) and are sister to all other Carabidae. This branch includes several clades in a comb-shaped arrangement, including Trachypachidae + Nebriini, Elaphrini, the southern-hemisphere *Pamborus* + *Ceroglossus*, *Cychnus*, and *Calosoma* as sister to *Carabus*. These five major genus-level lineages are monophyletic except for two genera of Trachypachidae, *Trachypachis* (represented by full mitogenome) and *Systolosoma* (represented by 18S only) are widely separated.

1. *Carabus*: the species groups of (Deuve et al., 2012) are mostly recovered but with slightly different relationships to each other. For example, Neocarabi are part of a wider clade including *Ohomopterus* and Archicarabus. This clade is embedded in a set of species groups of Multistriati, which are rendered paraphyletic with regard to the extended Neocarabi. Note that *Ohomopterus* from a different dataset (Sota et al., 2001) is embedded in Multistriati sister to *C. granulatus/hortensis*. The sister group of the large Multistriati + Neocarabi clade is (*Ctenocarabus* + *Tachypus*). Basal splits in *Carabus* largely correspond to the structure in Deuve et al. 2012.

2. Remaining Carabidae: Broscini sister to all others, followed by several small groups including (Promecognathinae, (Omophroninae + Psydrini)), Migadopini and Loricerini. Most of these groups have been sequenced for 18S only. The terminal split includes two very large clades, separating Trechitae and Harpalinae, each clade includes several smaller group of uncertain placement. Harpalinae is a terminal group that is embedded in various major lineages, including Scaritini, Clvini, Psydrini, Brachinini and others.

ii. **Trechitae (469 terminals).** Consisting of two major groups, with >200 available species of *Bembidion* internal relationships and relationships with smaller genera were arranged very similarly to the study of (Maddison and Ober, 2011). Patrobini are part of Trechitae (sister to *Trechus*), as found by (Maddison and Ober, 2011).

iii. **Harpalinae.** The NCBI taxonomy splits this group into multiple subfamilies, including Harpalinae, Licininae and Platyninae. Basal relationships in this very large group have been treated by (Ober and Heider, 2010) based on 28S and wingless, thus only one locus of those used here. Taxa present are derived from several large genus level studies (each ~100 species), for Blackburnia, Pterostichus, and Calathus. Harpalinae are monophyletic. The resolution in this part of the tree shows various incongruences with the tribal taxonomy. Basal splits are Zuphiini splitting before the Lebiini/Cyclosominini, which are sister to two large terminal clades corresponding mainly to (Zabrini + Pterostichini) and (Harpalini + Platinini). The sister relationships of Harpalinae are not clear.

**Important note: The following tree is a compressed version of the 1332 Carabidae terminals. Details are part of the complete tree included in Suppl File S4 and S5 (which spans over many pages). The corresponding tree can be reached by searching for the Label prefix "CA1C3C4".**

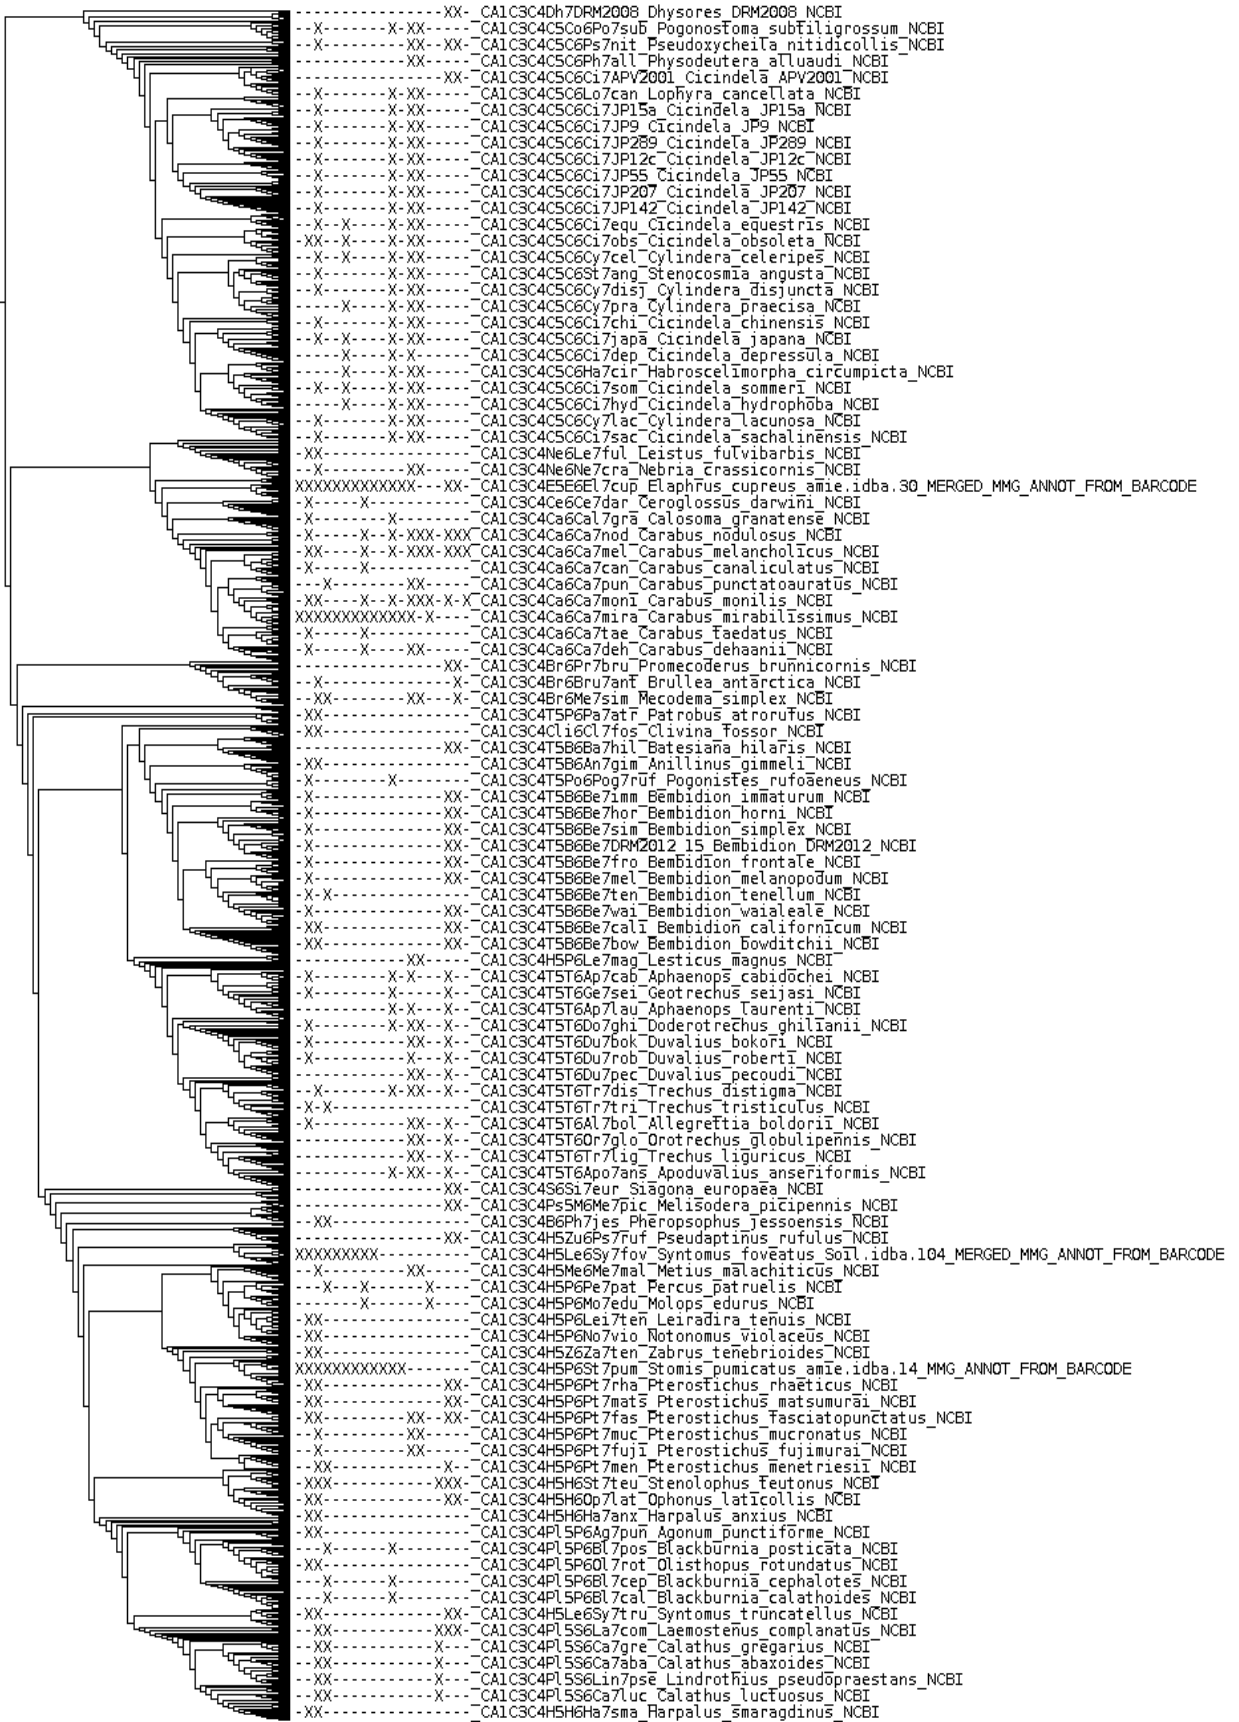

## References

- Balke, M., Ribera, I., Beutel, R., Vilorio, A., Garcia, M., Vogler, A.P., 2008. Systematic placement of the recently discovered beetle family Meruidae (Coleoptera: Dytiscoidea) based on molecular data. *Zool. Scr.* 37, 647–650.
- Balke, M., Ribera, I., Vogler, A.P., 2004. MtDNA phylogeny and biogeography of Copelatinae, a highly diverse group of tropical diving beetles (Dytiscidae). *Mol. Phylogenet. Evol.* 32, 866–880.
- Bocak, L., Barton, C., Crampton-Platt, A., Chesters, D., Ahrens, D., Vogler, A.P., 2014. Building the Coleoptera tree-of-life for >8000 species: composition of public DNA data and fit with Linnaean classification. *Syst. Entomol.* 39, 97–110.
- Deuve, T., Cruaud, A., Genson, G., Rasplus, J.-Y., 2012. Molecular systematics and evolutionary history of the genus *Carabus* (Col. Carabidae). *Mol. Phylogenet. Evol.* 65, 259–275.
- López-López, A., Vogler, A.P., n.d. The mitogenome phylogeny of Adephegidae (Coleoptera). *Mol. Phylogenet. Evol.* In press.
- Maddison, D.R., 2012. Phylogeny of Bembidion and related ground beetles (Coleoptera: Carabidae: Trechinae: Bembidiini: Bembidiina). *Mol. Phylogenet. Evol.* 63, 533–576.
- Maddison, D.R., Baker, M.D., Ober, K.A., 1999. Phylogeny of carabid beetles as inferred from 18S ribosomal DNA (Coleoptera: Carabidae). *Syst. Entomol.* 24, 103–138.
- Maddison, D.R., Moore, W., Baker, M.D., Ellis, T.M., Ober, K.A., Cannone, J.J., Gutell, R.R., 2009. Monophyly of terrestrial adephegidae beetles as indicated by three nuclear genes (Coleoptera: Carabidae and Trachypachidae). *Zool. Scr.* 38, 43–62.
- Maddison, D.R., Ober, K.A., 2011. Phylogeny of minute carabid beetles and their relatives based upon DNA sequence data (Coleoptera, Carabidae, Trechinae). *Zookeys* 229–260.
- McKenna, D.D., Wild, A.L., Kanda, K., Bellamy, C.L., Beutel, R.G., Caterino, M.S., Farnum, C.W., Hawks, D.C., Ivie, M.A., Jameson, M.L., Leschen, R.A.B., Marvaldi, A.E., Mchugh, J.V., Newton, A.F., Robertson, J.A., Thayer, M.K., Whiting, M.F., Lawrence, J.F., ŚLIPINSKI, A., Maddison, D.R., Farrell, B.D., 2015. The beetle tree of life reveals that Coleoptera survived end-Permian mass extinction to diversify during the Cretaceous terrestrial revolution. *Syst. Entomol.* 40, 835–880.
- Miller, K.B., Bergsten, J., 2012. Phylogeny and classification of whirligig beetles (Coleoptera: Gyrinidae): relaxed-clock model outperforms parsimony and time-free Bayesian analyses. *Syst. Entomol.* 37, 706–746.
- Misof, B., Liu, S., Meusemann, K., Peters, R.S., Donath, A., Mayer, C., Frandsen, P.B., Ware, J., Flouri, T., Beutel, R.G., Niehuis, O., Petersen, M., Izquierdo-Carrasco, F., Wappler, T., Rust, J., Aberer, A.J., Aspöck, U., Aspöck, H., Bartel, D., Blanck, A., Berger, S., Böhm, A., Buckley, T.R., Calcott, B., Chen, J., Friedrich, F., Fukui, M., Fujita, M., Greve, C., Grobe, P., Gu, S., Huang, Y., Jermiin, L.S., Kawahara, A.Y., Krogmann, L., Kubiak, M., Lanfear, R., Letsch, H., Li, Y., Li, Z., Li, J., Lu, H., Machida, R., Mashimo, Y., Kapli, P., McKenna, D.D., Meng, G., Nakagaki, Y., Navarrete-Heredia, J.L., Ott, M., Ou, Y., Pass, G., Podsiadlowski, L., Pohl, H., von Reumont, B.M., Schütte, K., Sekiya, K., Shimizu, S., Slipinski, A., Stamatakis, A., Song, W., Su, X., Szucsich, N.U., Tan, M., Tan, X., Tang, M., Tang, J., Timelthaler, G., Tomizuka, S., Trautwein, M., Tong, X., Uchifune, T., Walz, M.G., Wiegmann, B.M., Wilbrandt, J., Wipfler, B., Wong, T.K.F., Wu, Q., Wu, G., Xie, Y., Yang, S., Yang, Q., Yeates, D.K., Yoshizawa, K., Zhang, Q., Zhang, R., Zhang, W., Zhang, Y., Zhao, J., Zhou, C., Zhou, L., Ziesmann, T., Zou, S., Li, Y., Xu, X., Zhang, Y., Yang, H., Wang, J., Wang, J., Kjer, K.M., Zhou, X., 2014. Phylogenomics resolves the timing and pattern of insect evolution. *Science* 346, 763–767.
- Ober, K.A., 2002. Phylogenetic relationships of the carabid subfamily Harpalinae (Coleoptera) based on molecular sequence data. *Mol. Phylogenet. Evol.* 24, 228–248.
- Ober, K.A., Heider, T.N., 2010. Phylogenetic diversification patterns and divergence times in ground beetles (Coleoptera: Carabidae: Harpalinae). *BMC Evol. Biol.* 10, 262.
- Pons, J., Barraclough, T., Theodorides, K., Cardoso, A., Vogler, A., 2004. Using exon and intron sequences of the gene *Mp20* to resolve basal relationships in *Cicindela* (Coleoptera: Cicindelidae). *Syst. Biol.* 53, 554–570.
- Ribera, I., 2008. Habitat constraints and the generation of diversity in freshwater macroinvertebrates, in: *Aquatic Insects: Challenges to Populations*. pp. 289–311.
- Shull, V.L., Vogler, A.P., Baker, M.D., Maddison, D.R., Hammond, P.M., 2001. Sequence alignment of 18S ribosomal RNA and the basal relationships of Adephegidae beetles: evidence for monophyly of aquatic families and the placement of Trachypachidae. *Syst. Biol.* 50, 945–969.
- Sota, T., Ishikawa, R., Ujiié, M., Kusumoto, F., Vogler, A.P., 2001. Extensive trans-species



- mitochondrial polymorphisms in the carabid beetles *Carabus* subgenus *Ohomopterus* caused by repeated introgressive hybridization. *Mol. Ecol.* 10, 2833–2847.
- Sota, T., Liang, H., Enokido, Y., Hori, M., 2011. Phylogeny and divergence time of island tiger beetles of the genus *Cylindera* (Coleoptera: Cicindelidae) in East Asia. *Biol. J. Linn. Soc. Lond.* 102, 715–727.
- Timmermans, M.J.T.N., Barton, C., Haran, J., Ahrens, D., Culverwell, C.L., Ollikainen, A., Dodsworth, S., Foster, P.G., Bocak, L., Vogler, A.P., 2016. Family-Level Sampling of Mitochondrial Genomes in Coleoptera: Compositional Heterogeneity and Phylogenetics. *Genome Biol. Evol.* 8, 161–175.
- Vogler, A., Cardoso, A., Barraclough, T., 2005. Exploring Rate Variation Among and Within Sites in a Densely Sampled Tree: Species Level Phylogenetics of North American Tiger Beetles (Genus *Cicindela*). *Syst. Biol.* 54, 4–20.
- Vogler, A.P., Pearson, D.L., 1996. A molecular phylogeny of the tiger beetles (Cicindelidae): congruence of mitochondrial and nuclear rDNA data sets. *Mol. Phylogenet. Evol.* 6, 321–338.
